# Supplementary material for: Determination of complete chromosomal haplotypes by bulk DNA sequencing
Source: PubMed Central journal article supplement (PMC8101039; doi:10.1186/s13059-021-02330-1), 2021-05-06

# **K-562: cytogenetic karyotypes**

Gribble et al. Cancer Genetics and Cytogenetics, 2000.

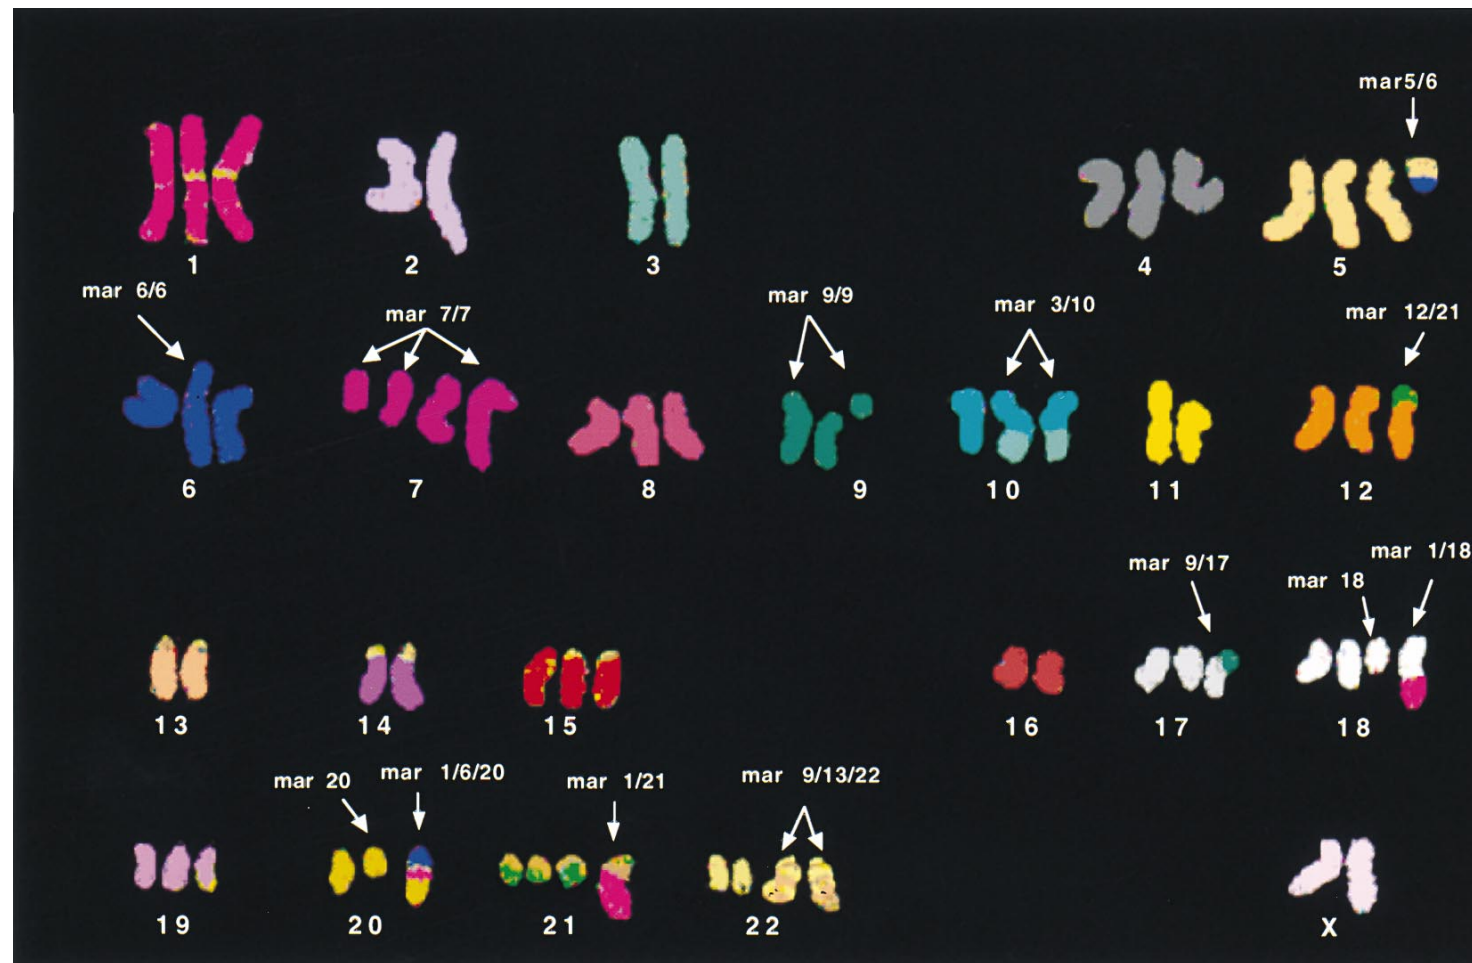

Naumann et al. Leukemia Research, 2001.

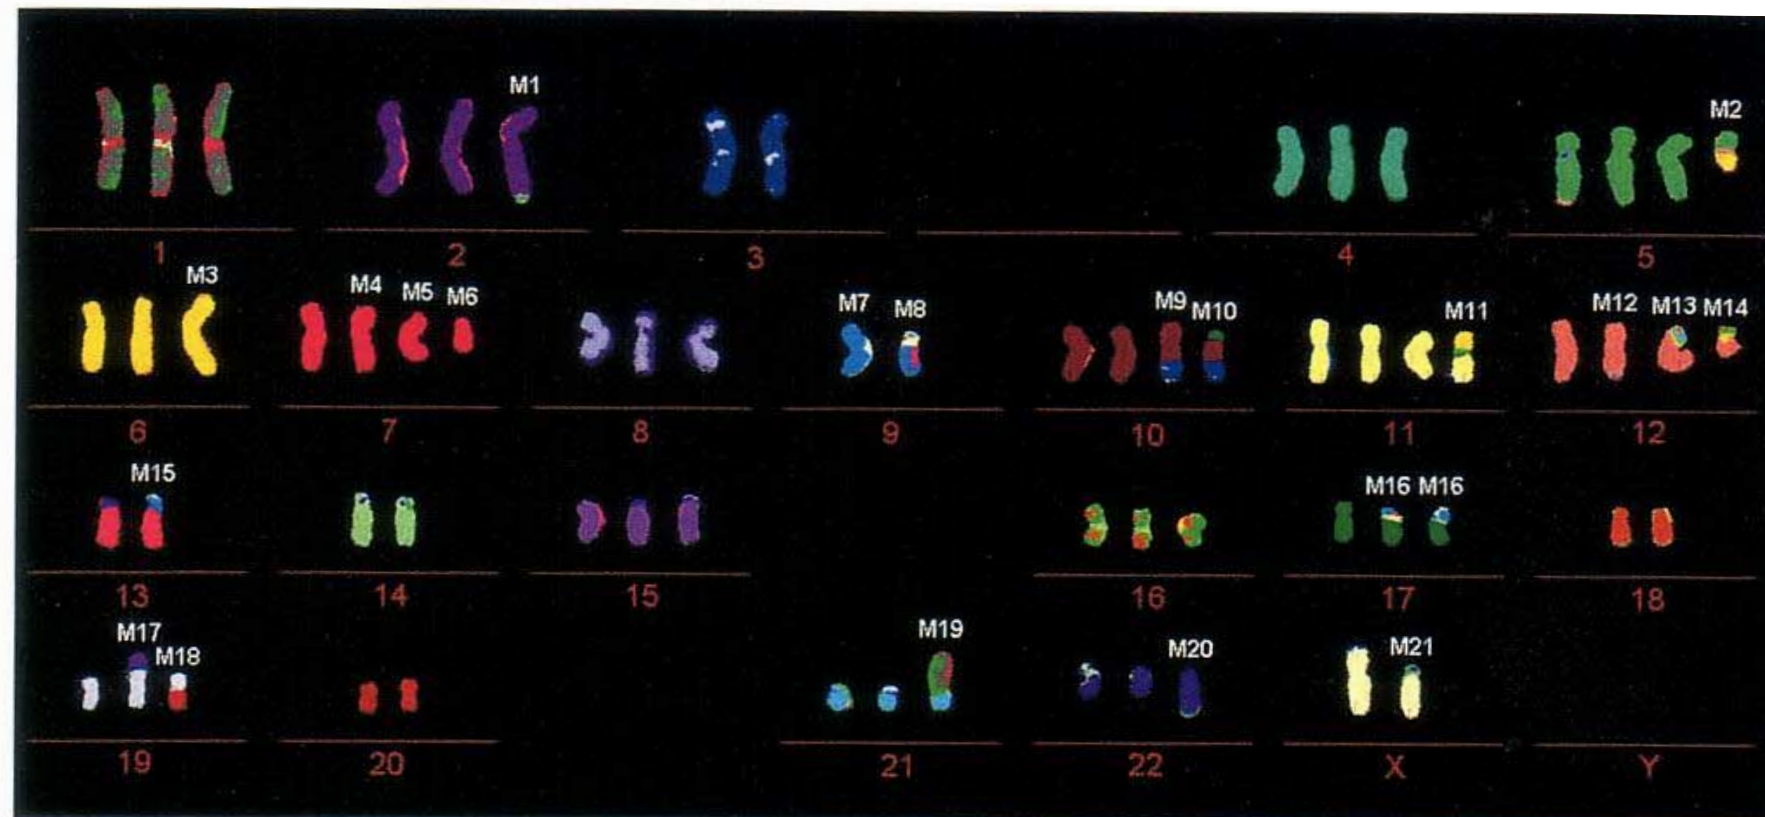

# Selected marker chromosomes

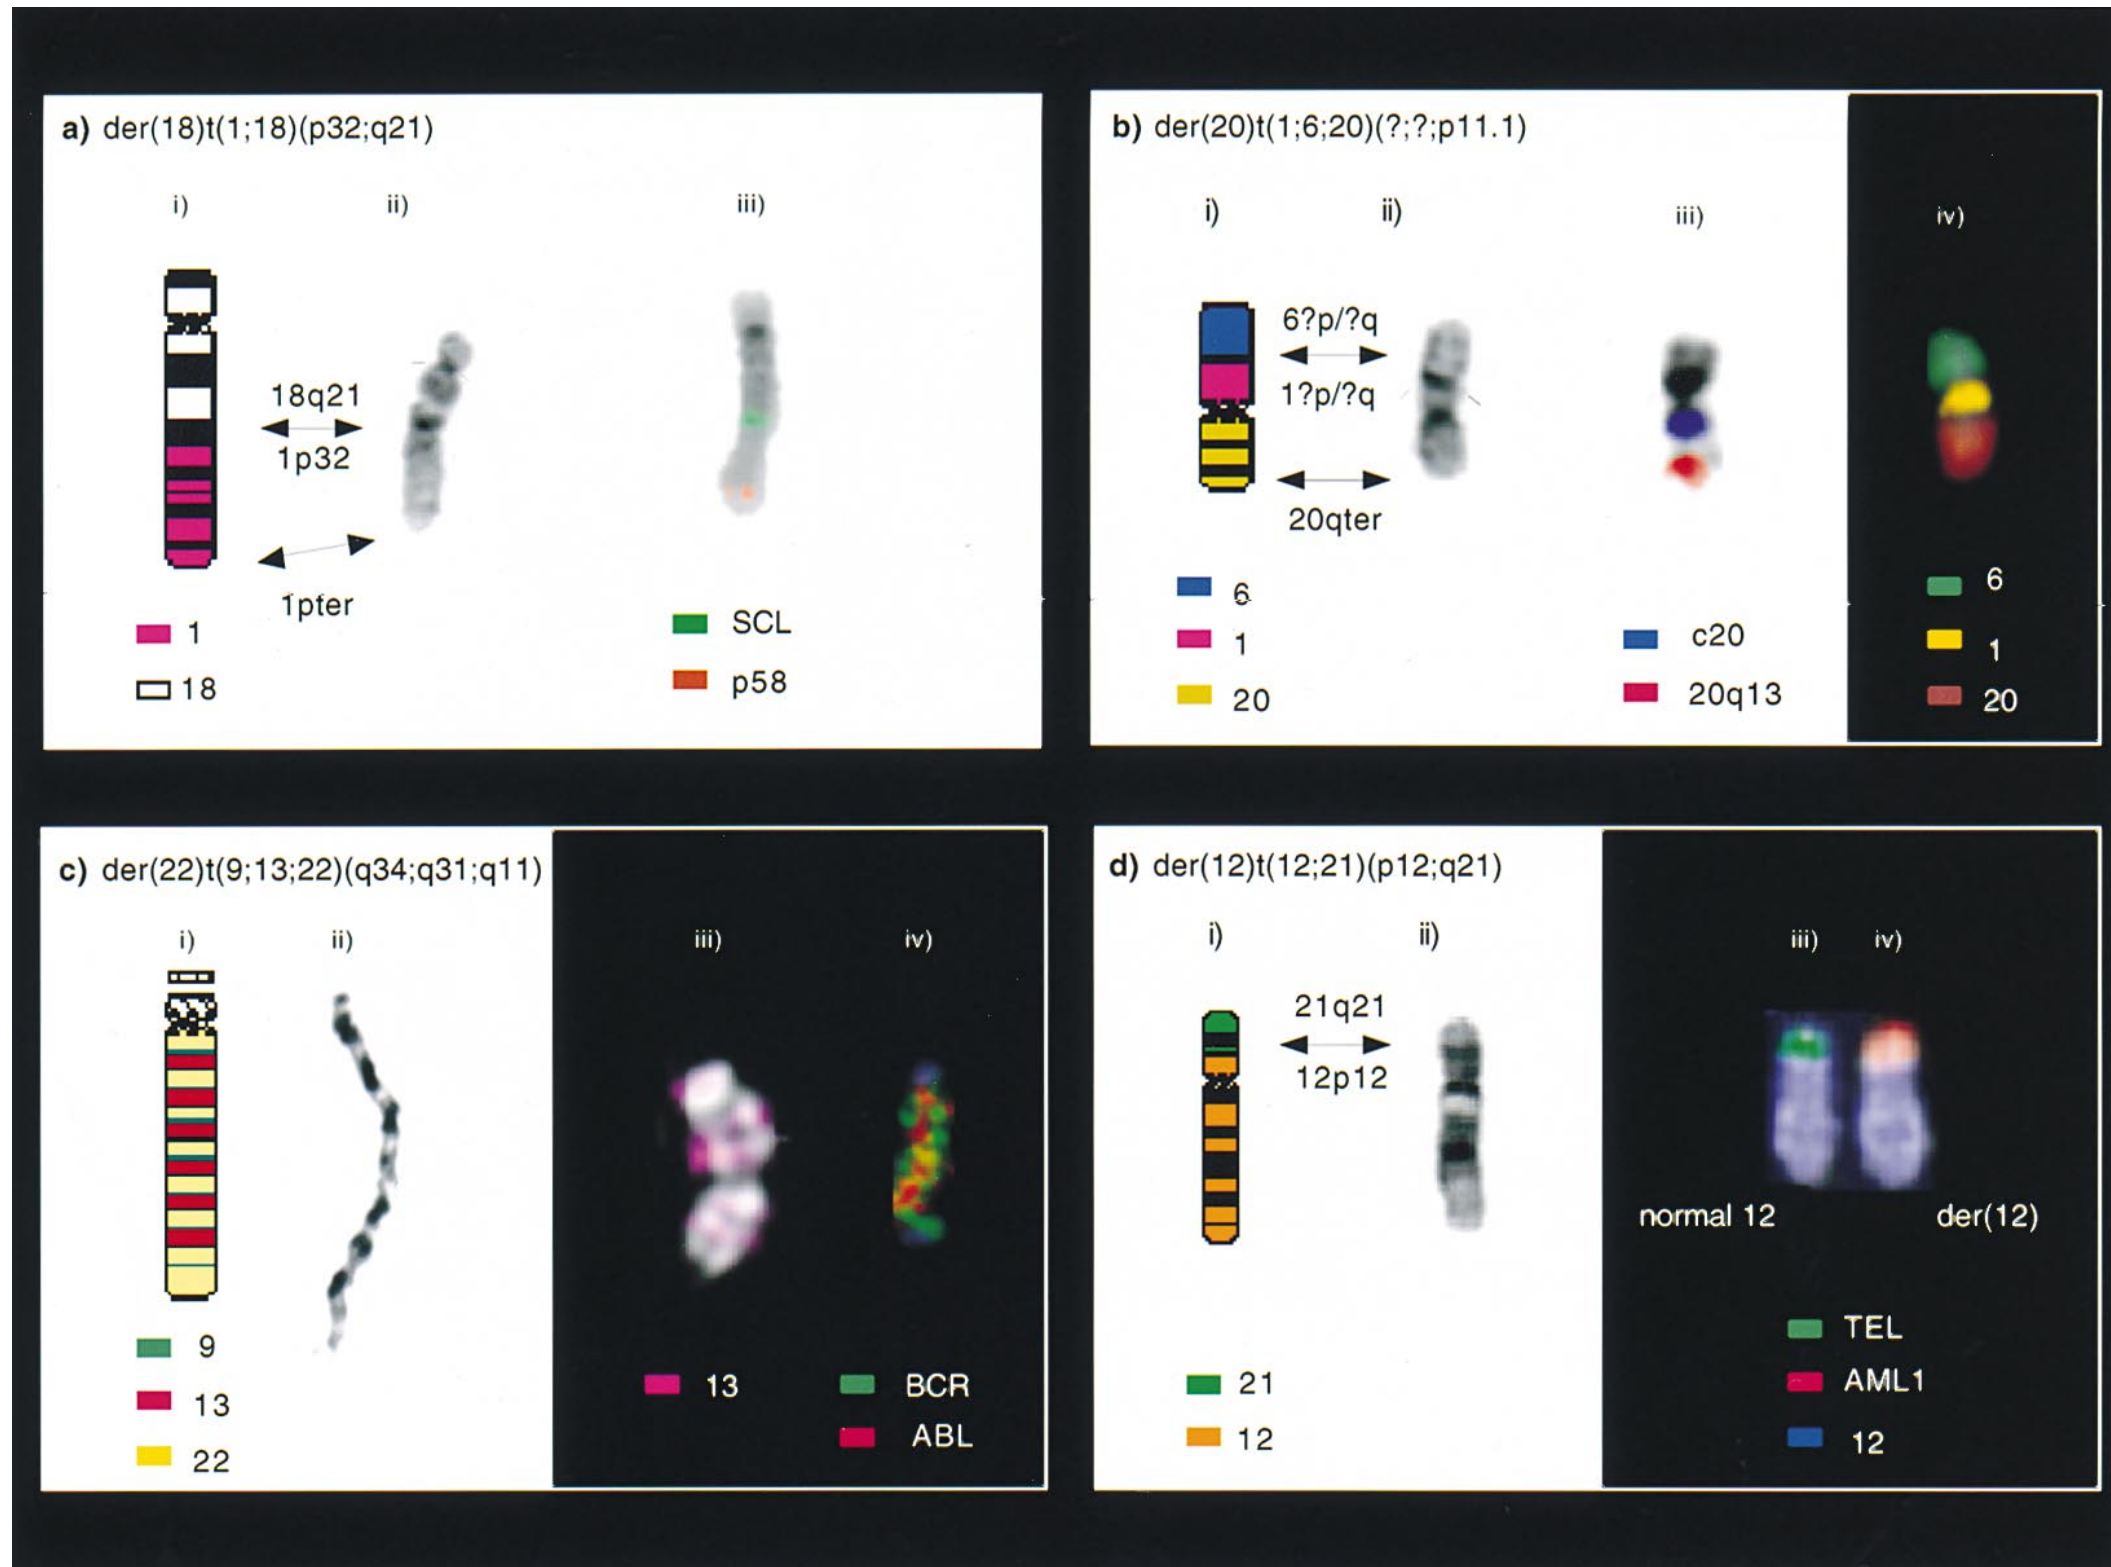

**Chromosomal copy  
number**

# Chromosomal copy number

Chr1

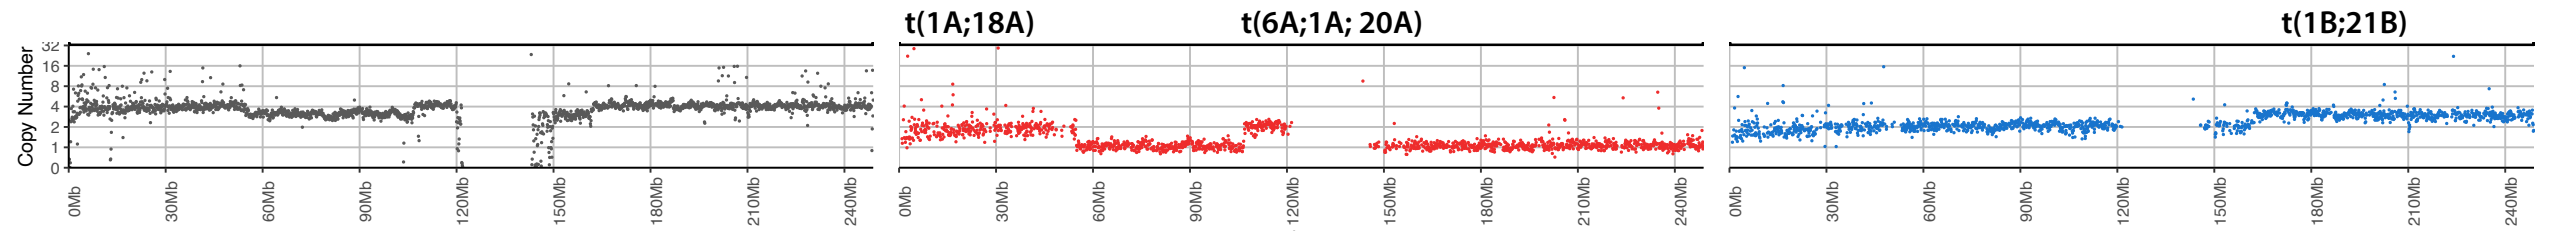

Chr2

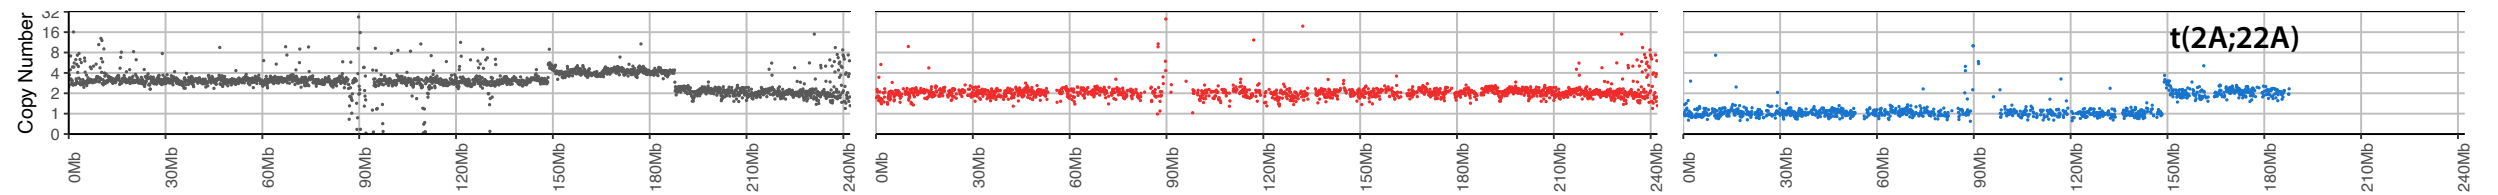

Chr3

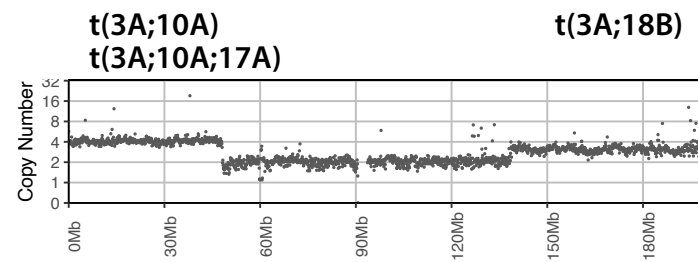

Chr4

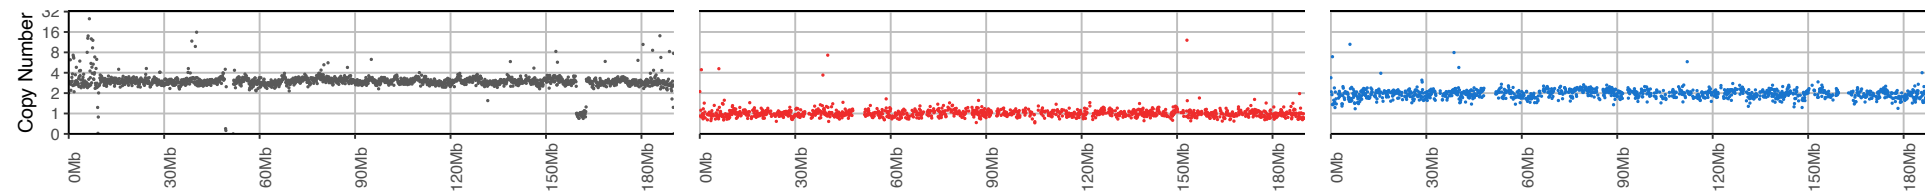

Chr5

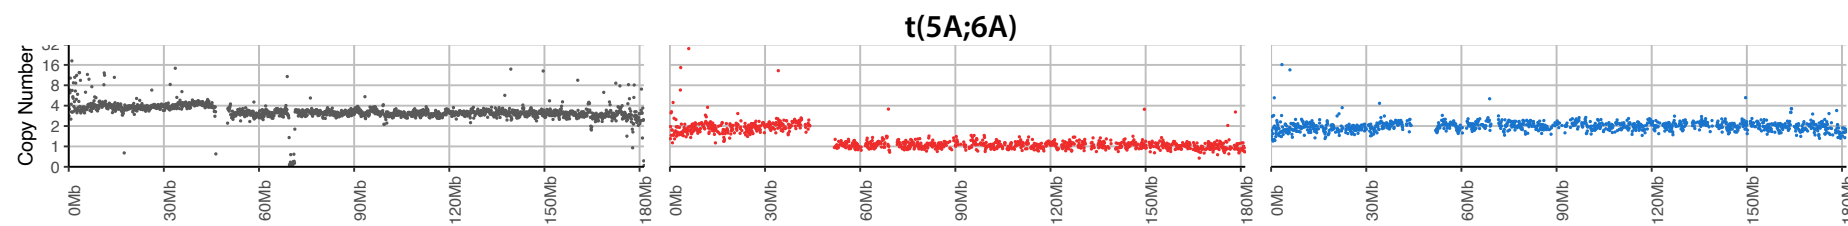

Chr6

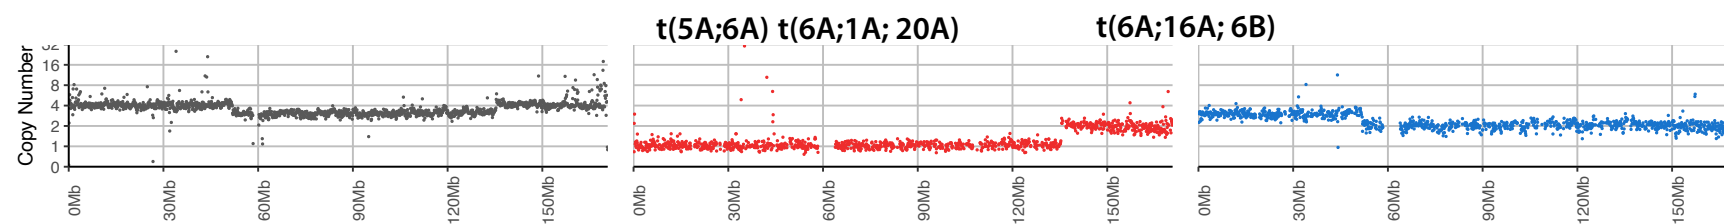

# Chromosomal copy number

Chr7

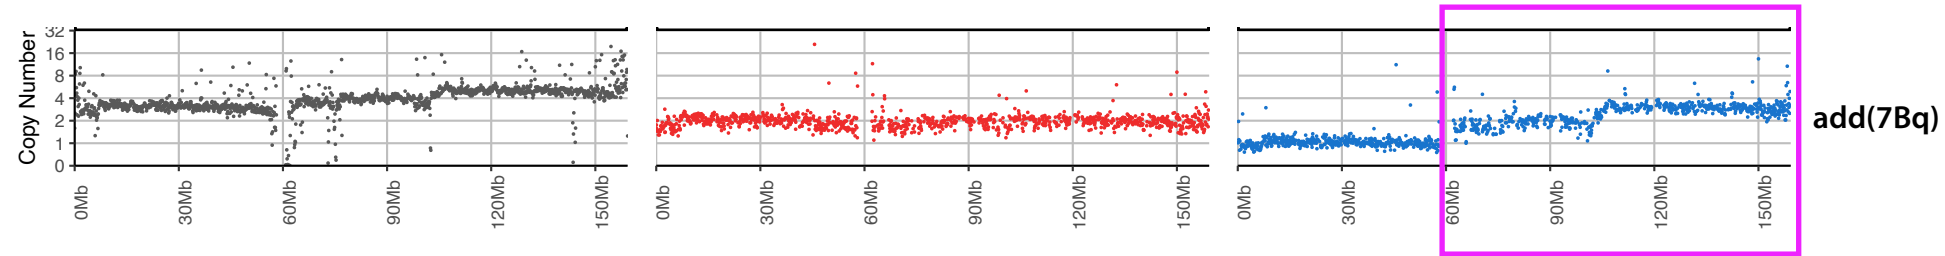

Chr8

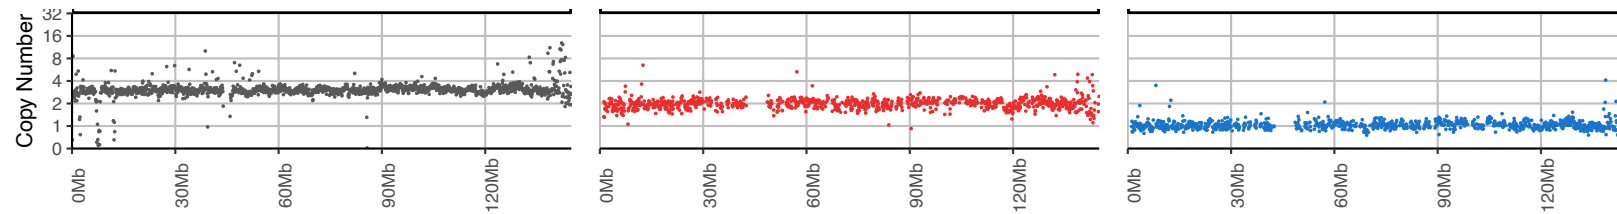

Chr9

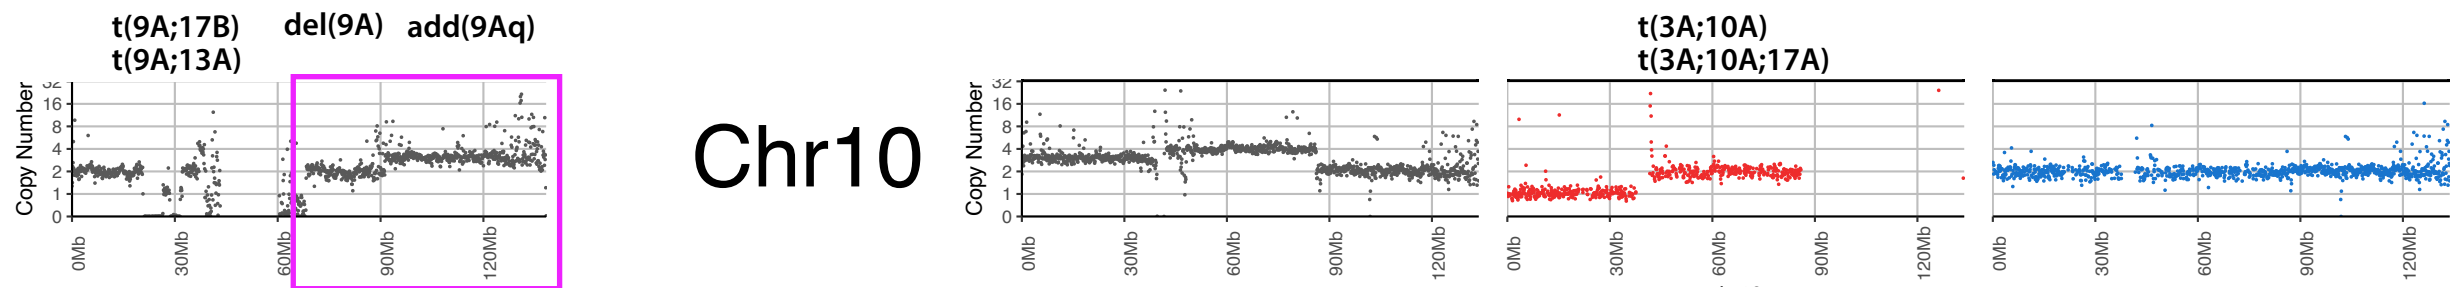

Chr11

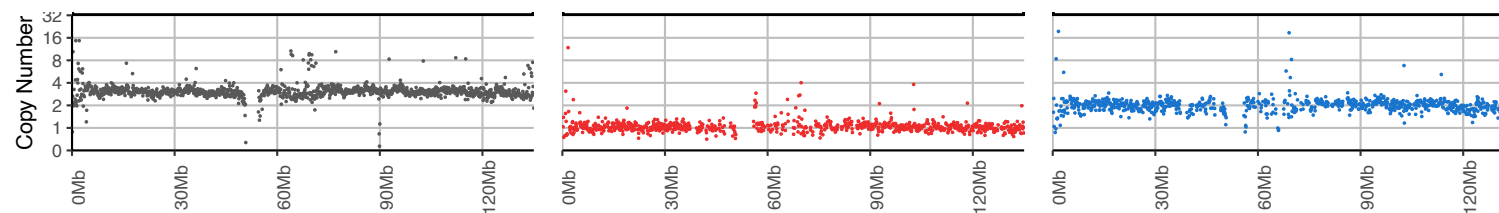

Chr13

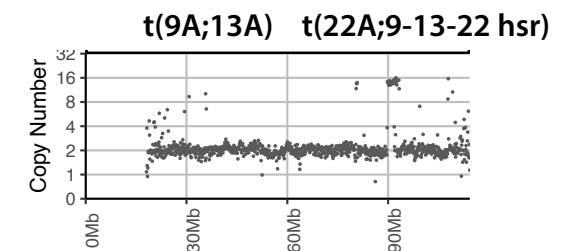

Chr12

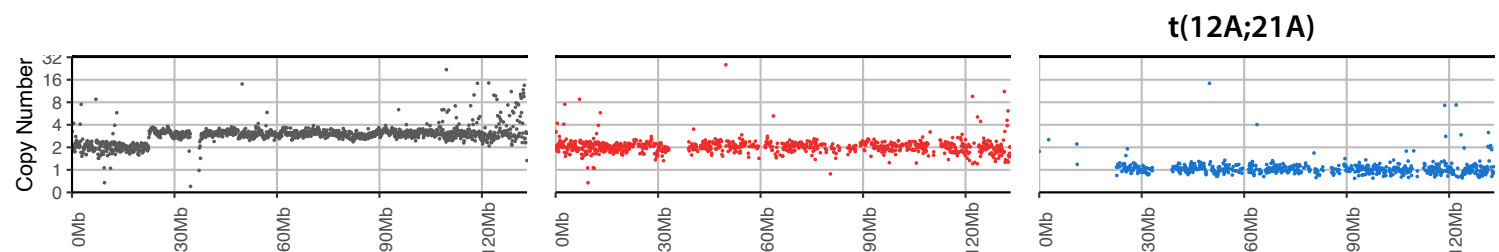

Chr14

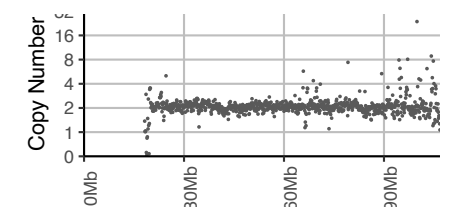

# Chromosomal copy number

Chr15

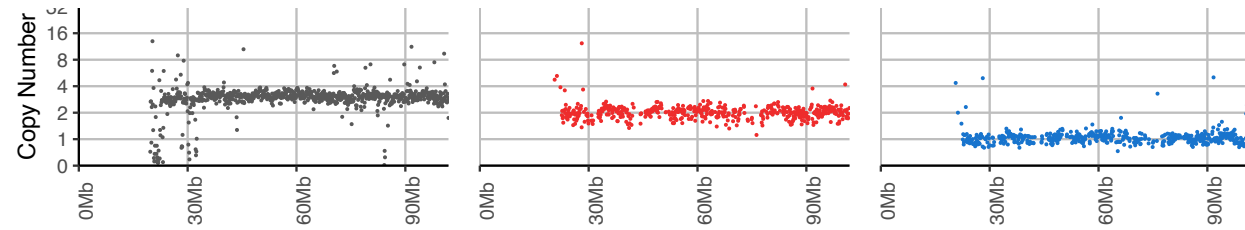

Chr19

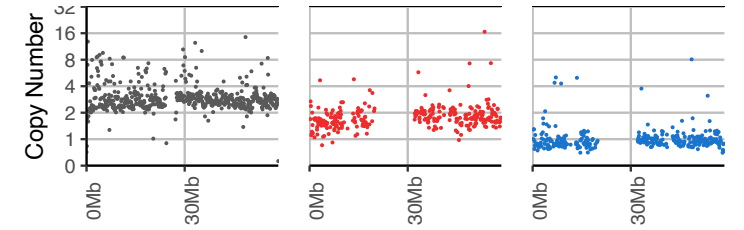

Chr16

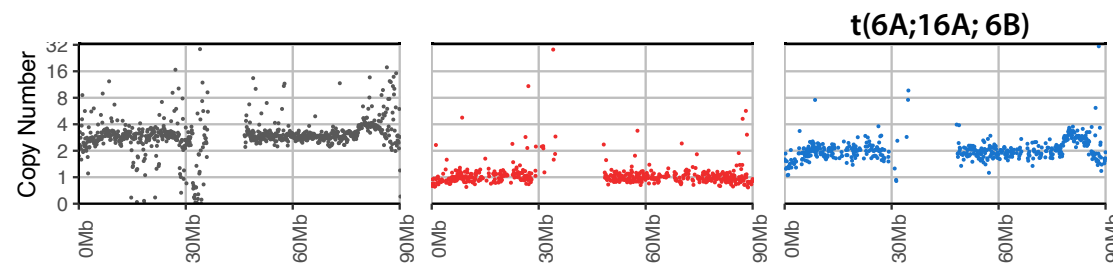

Chr20

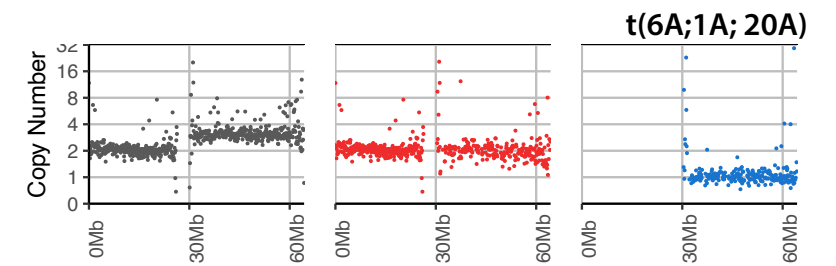

Chr17

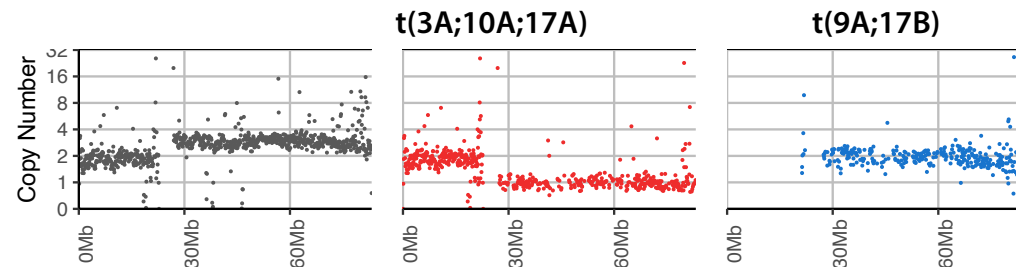

Chr21

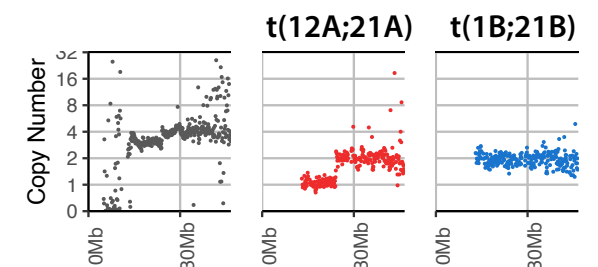

Chr18

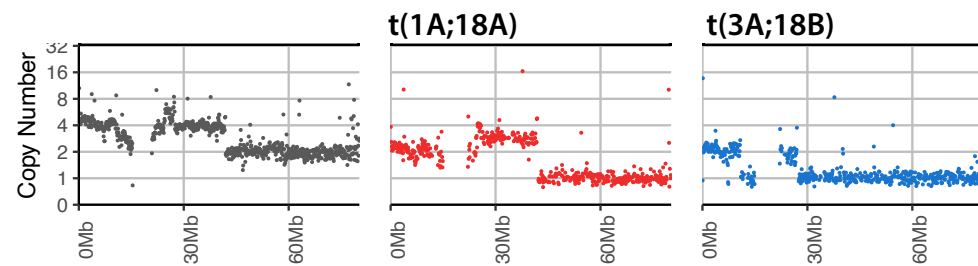

Chr22

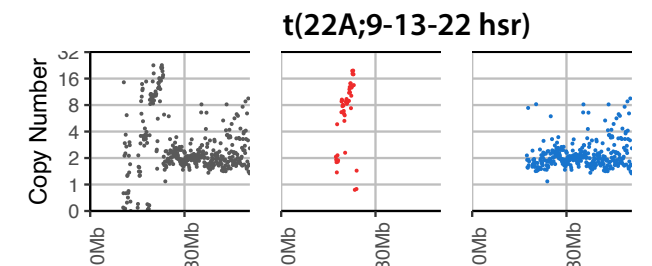

ChrX

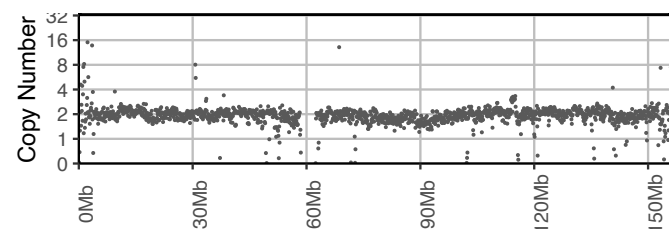

# **Digital karyotype**



# Structurally normal chromosomes

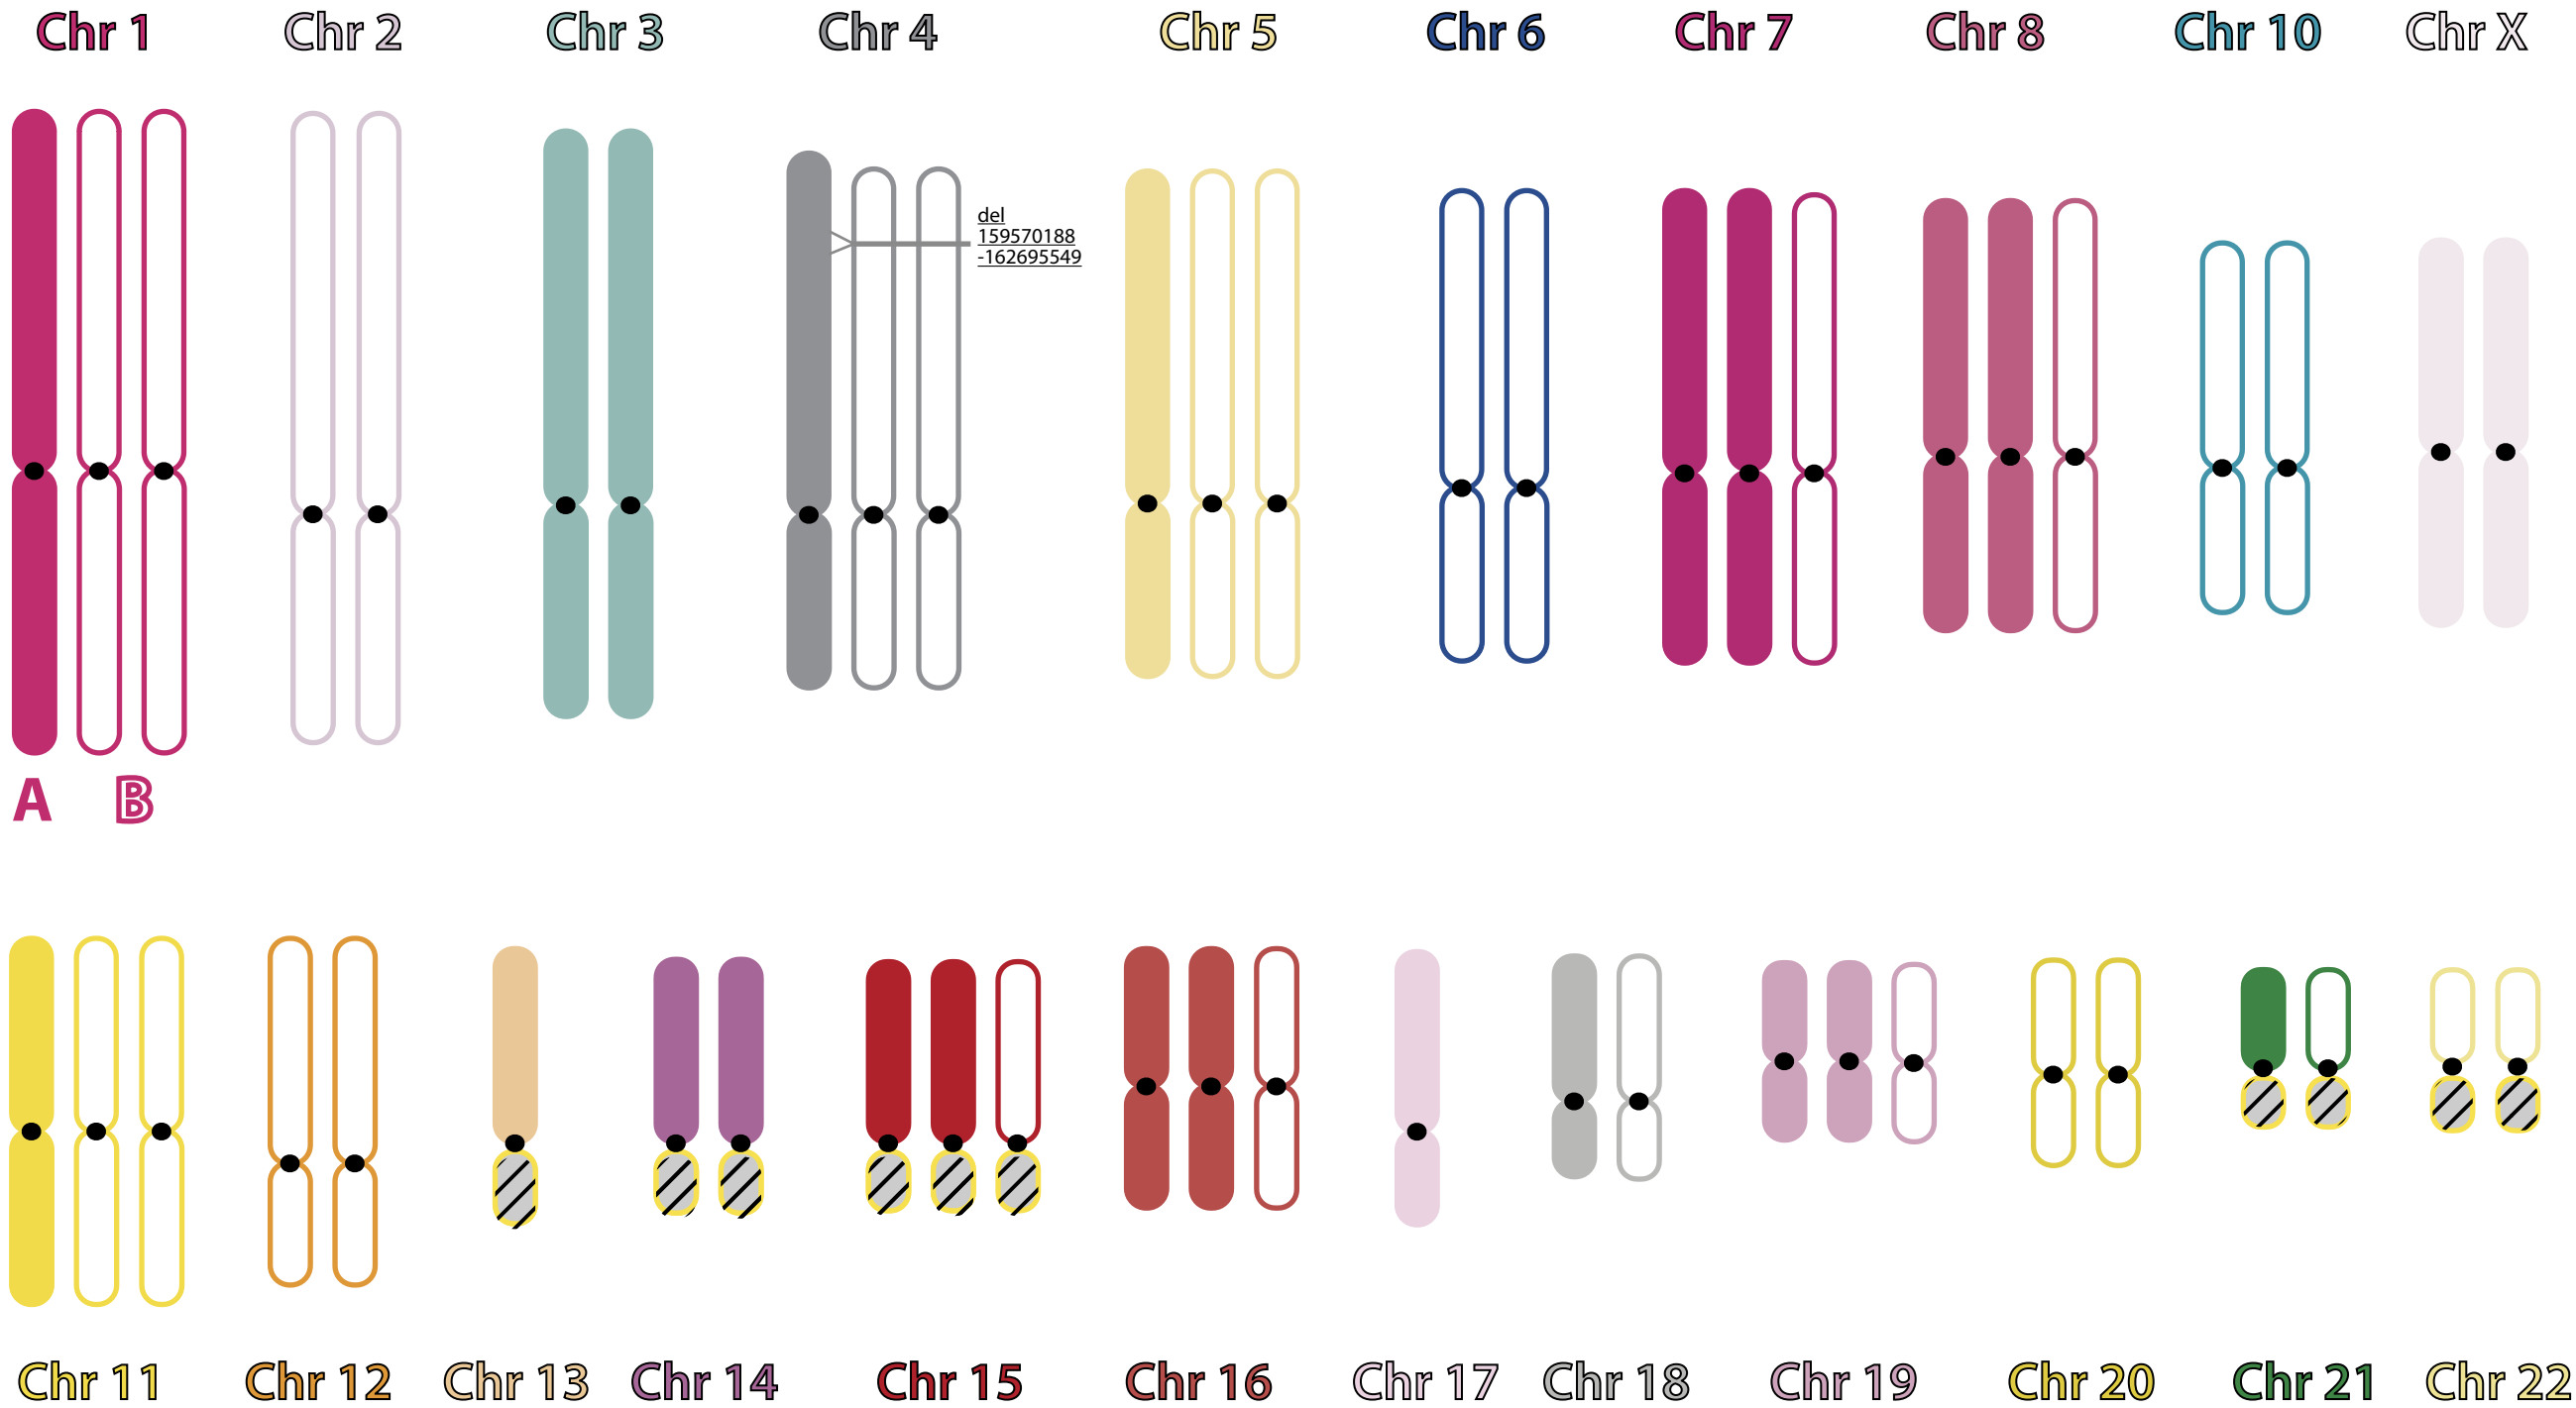

# Marker chromosomes

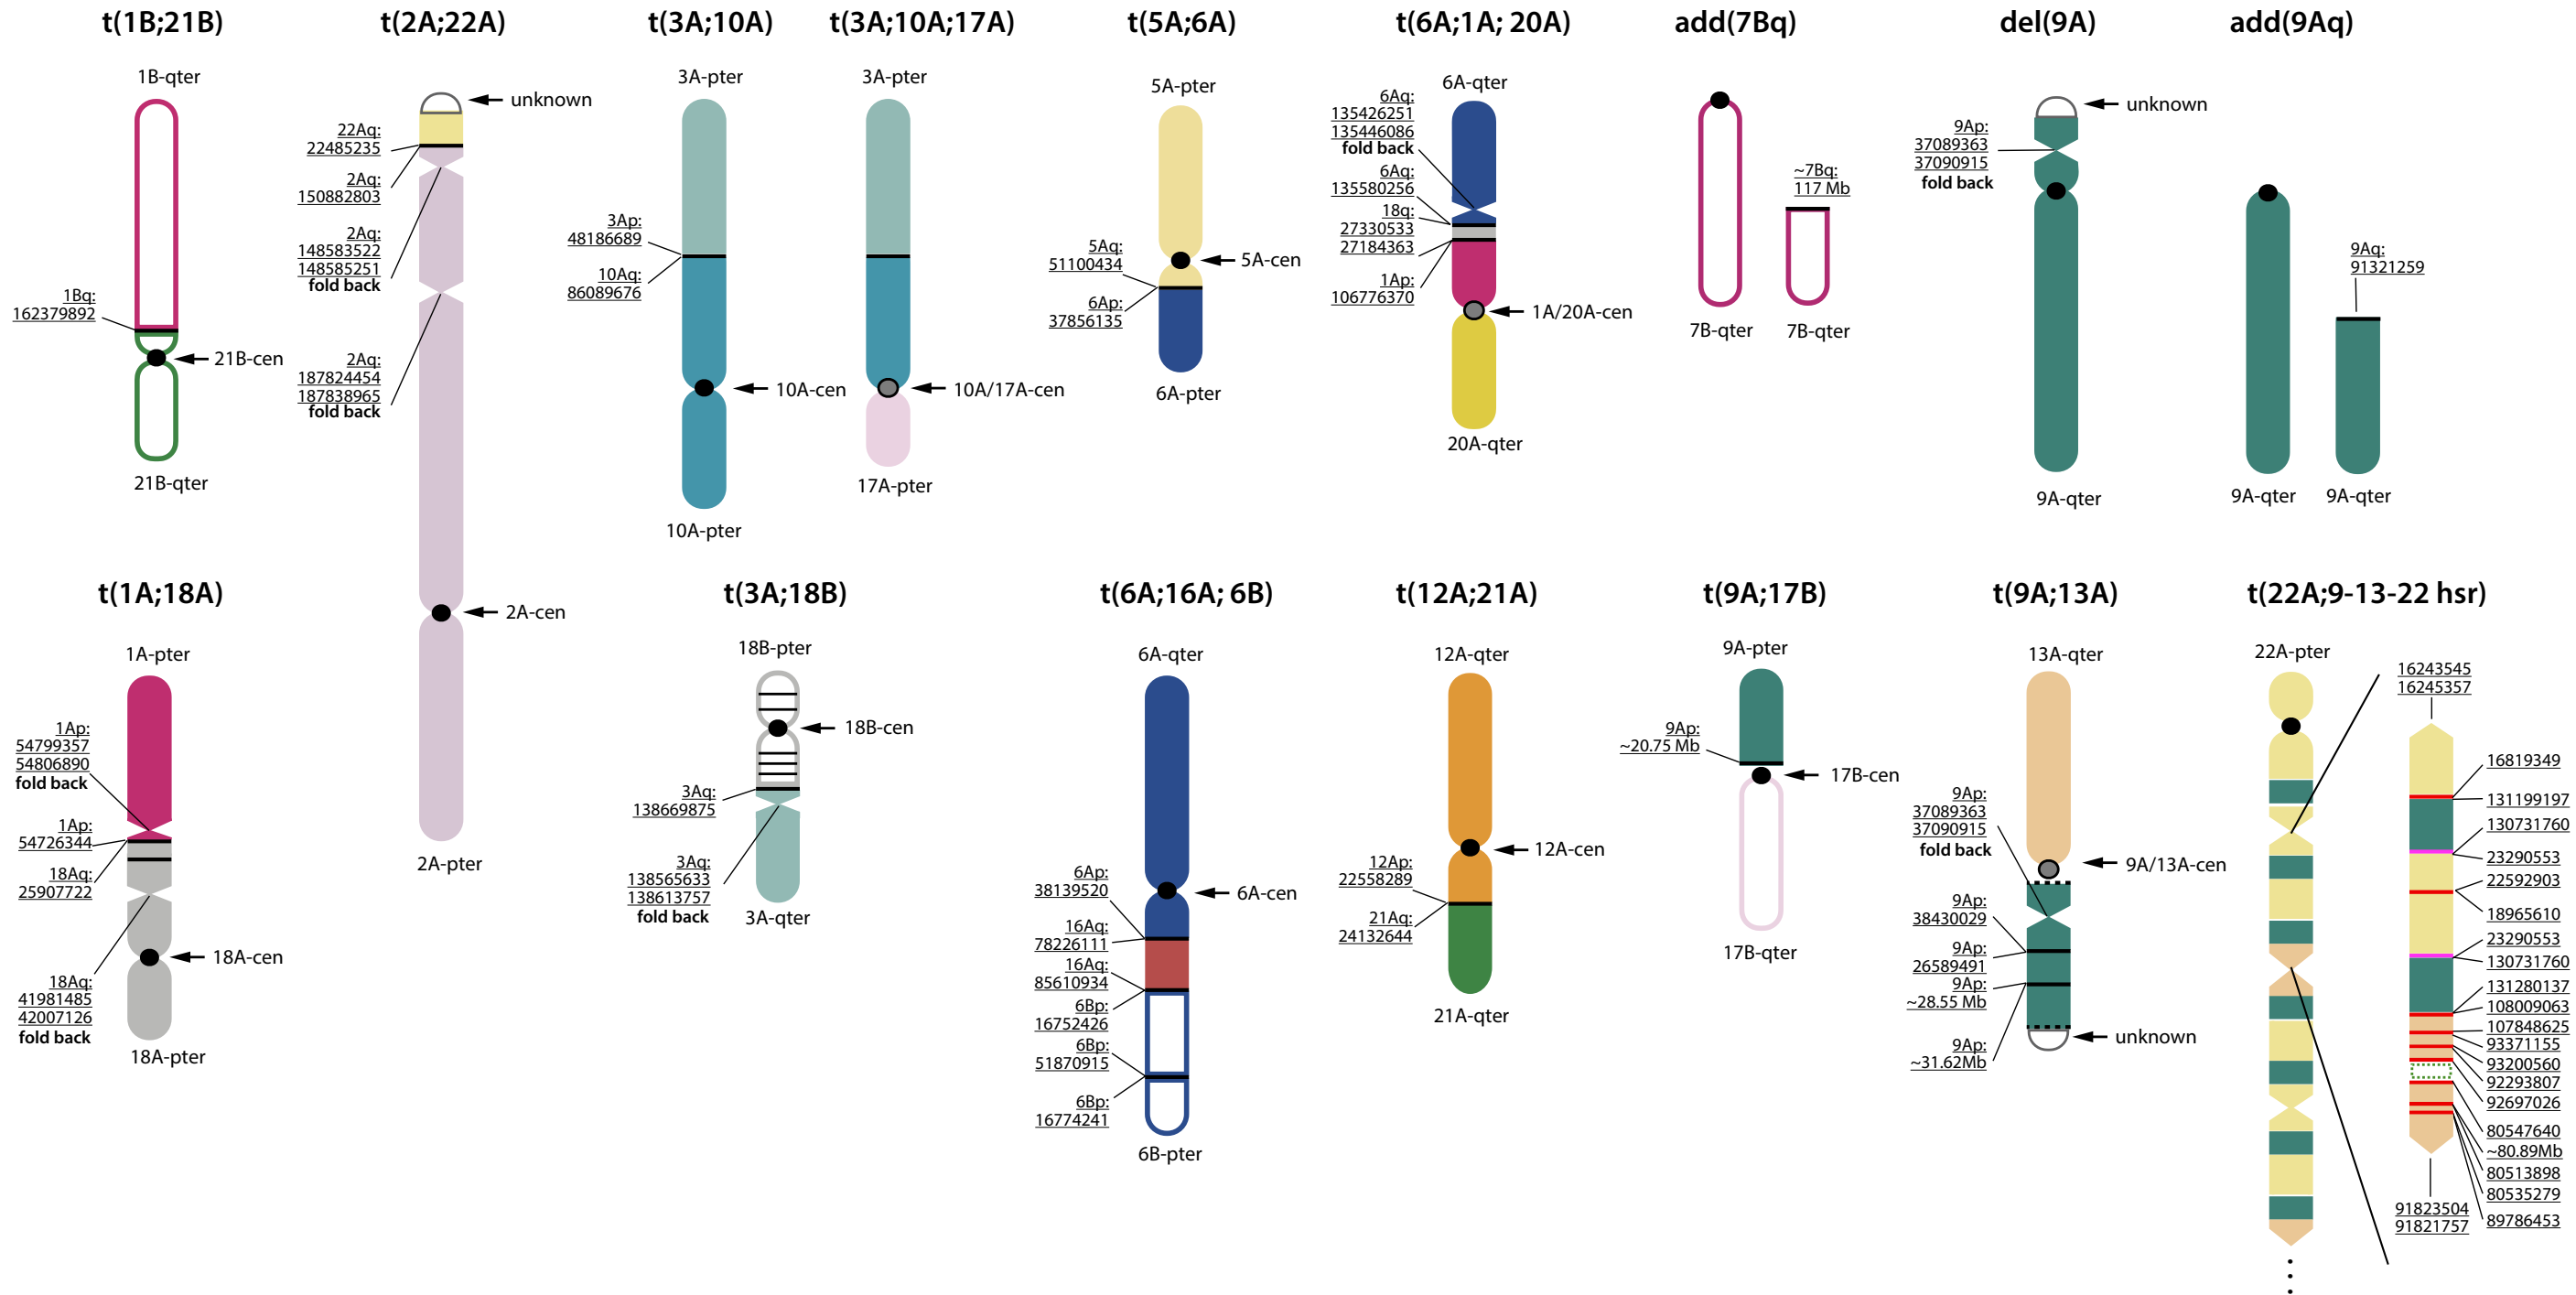

**Marker chromosomes  
with completely resolved  
translocations**

t(5A;6A)

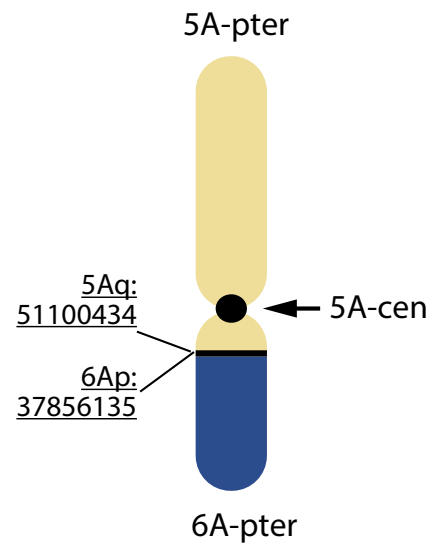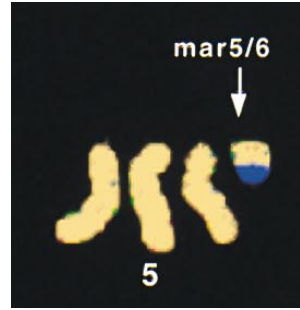

10X

chr5\_51100434---chr6\_37856135

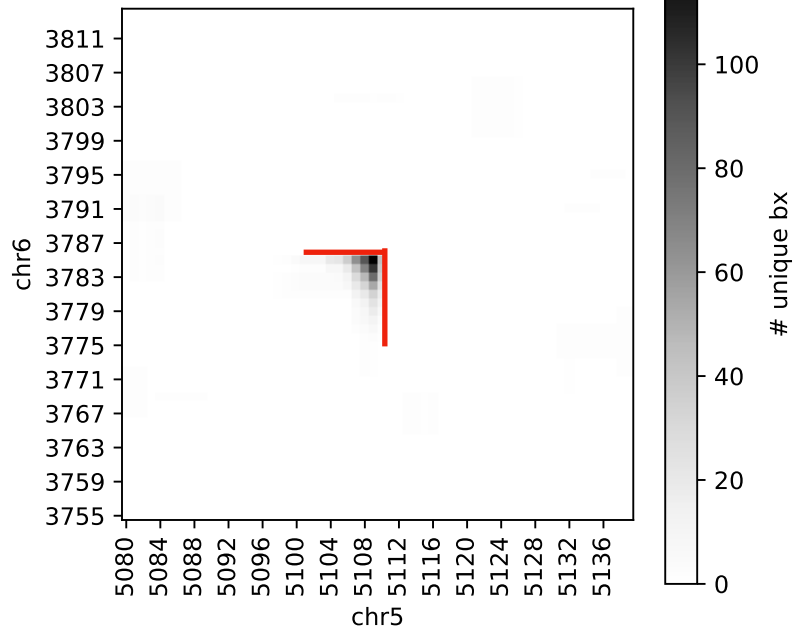

A

B

Chr6

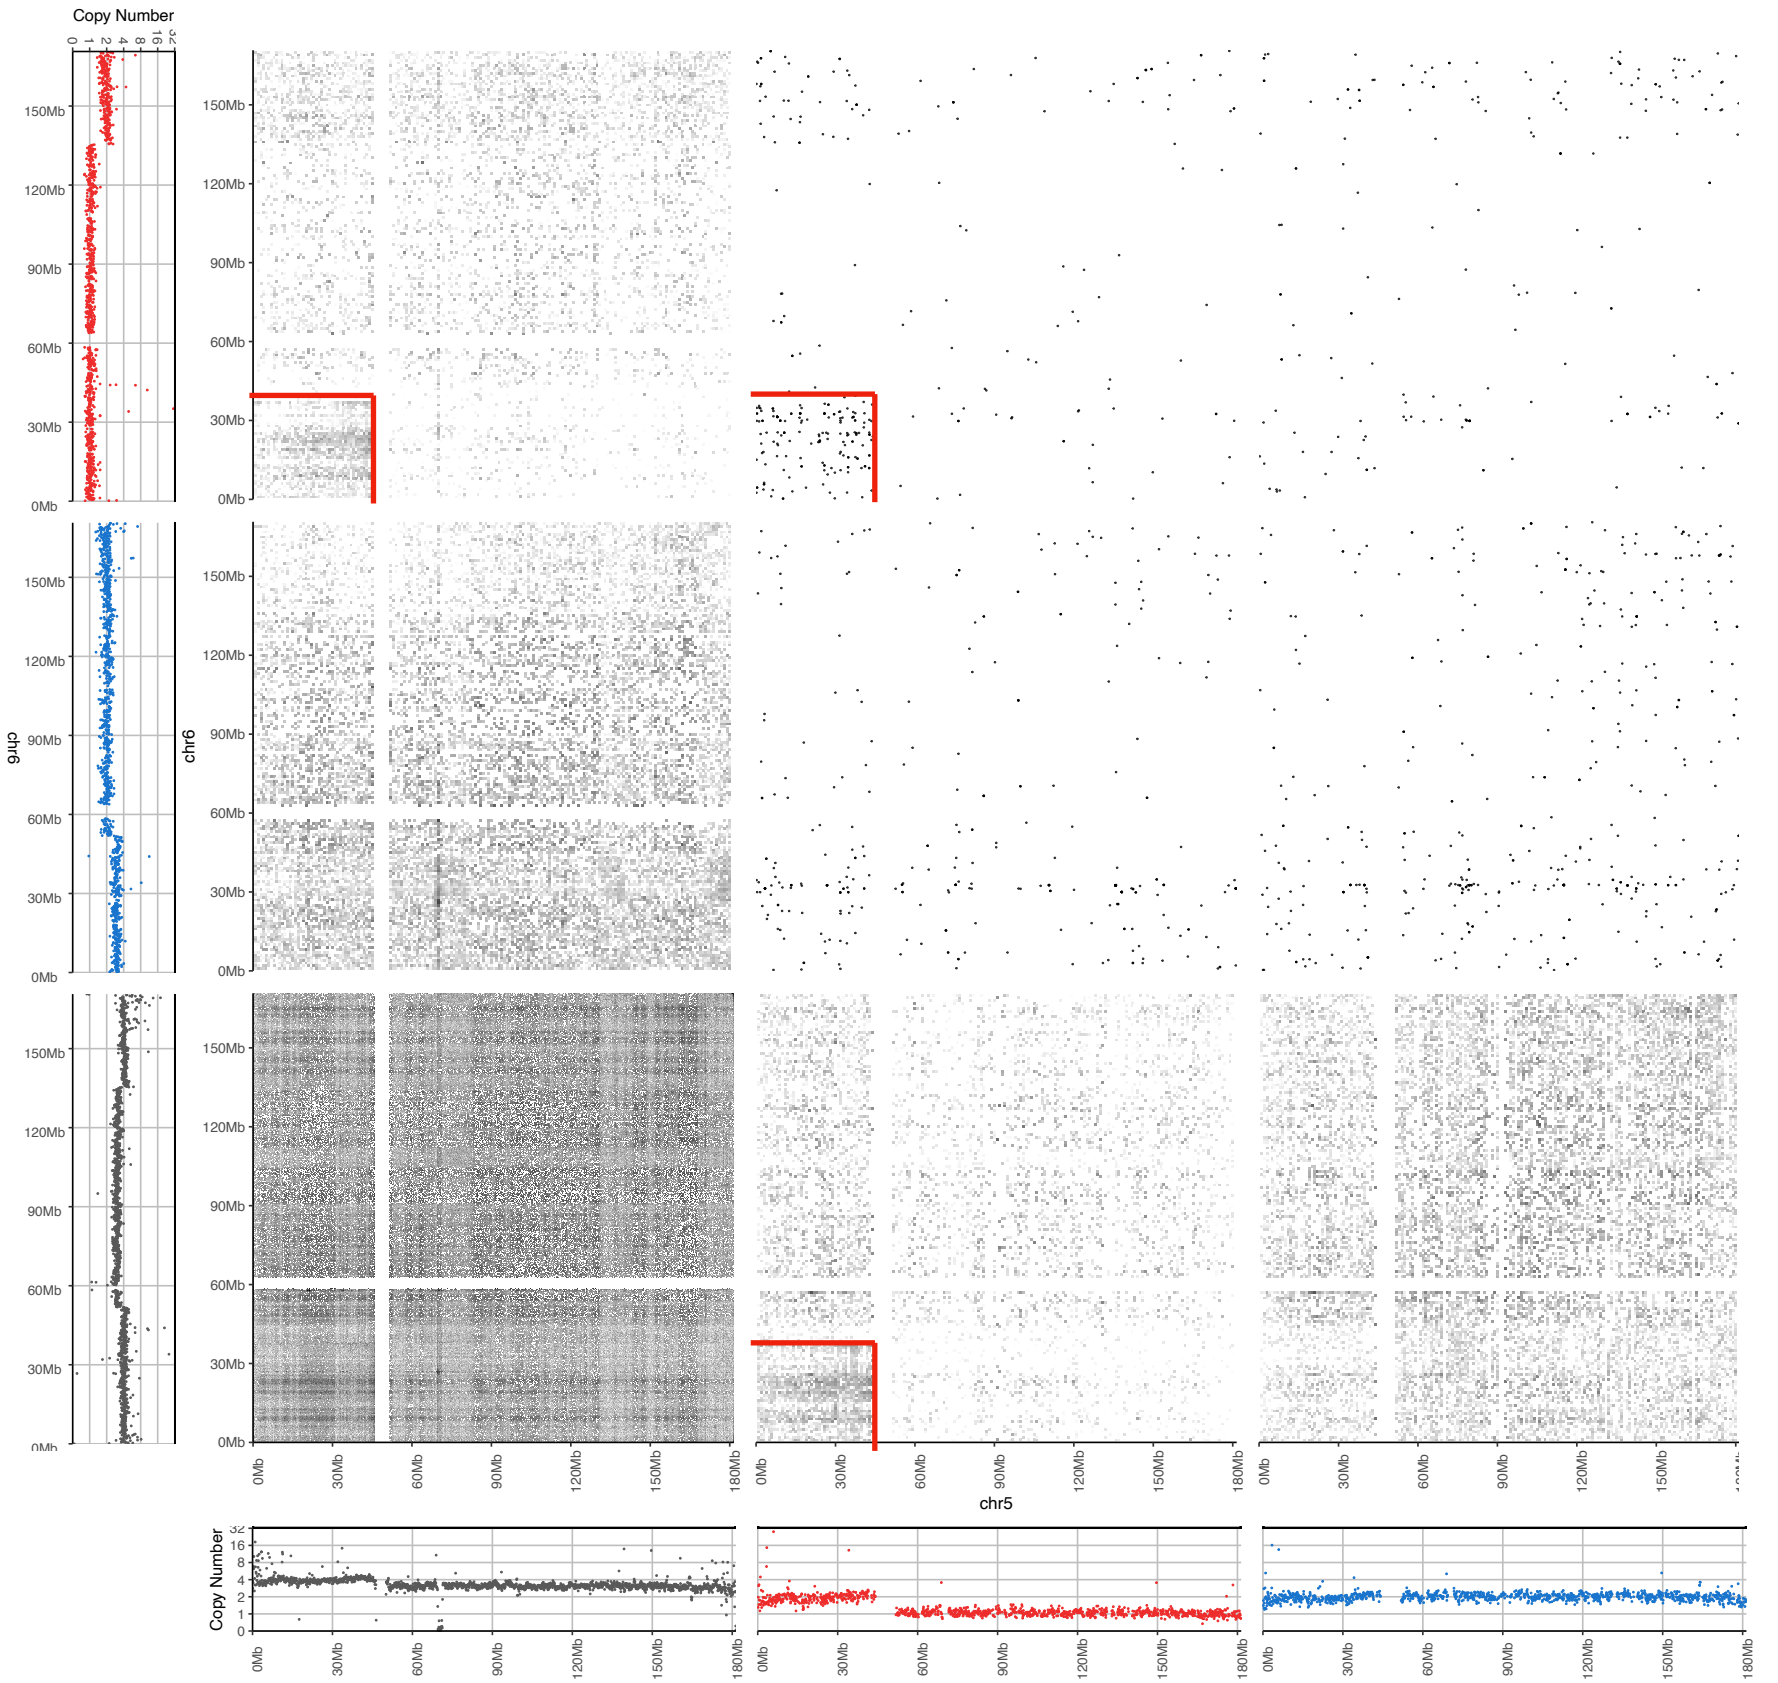

Chr5

A

B

HiC

# t(12A;21A)

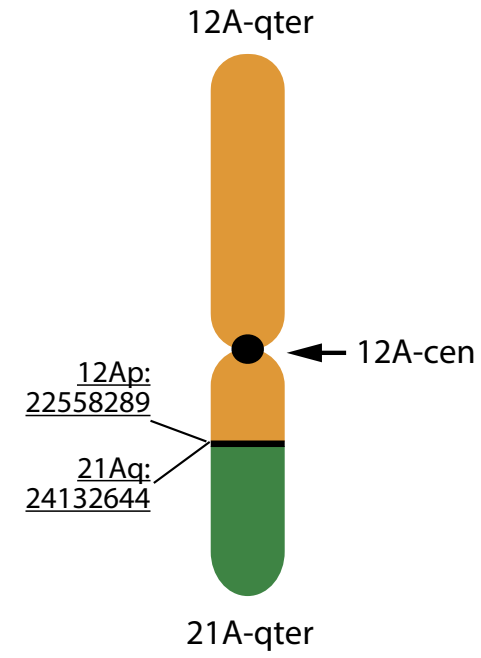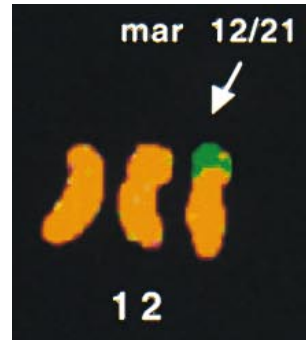

# 10X

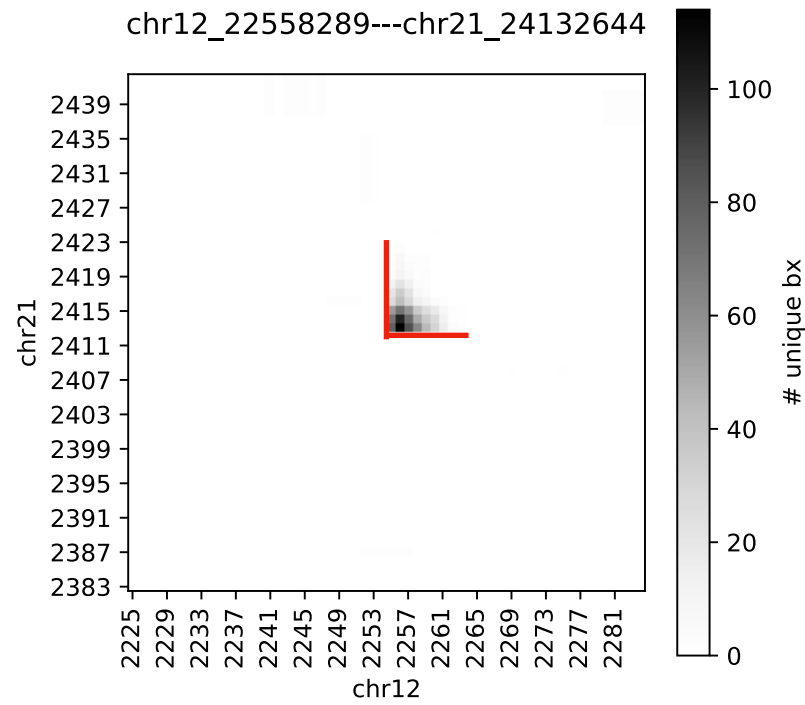

A

B

Chr21

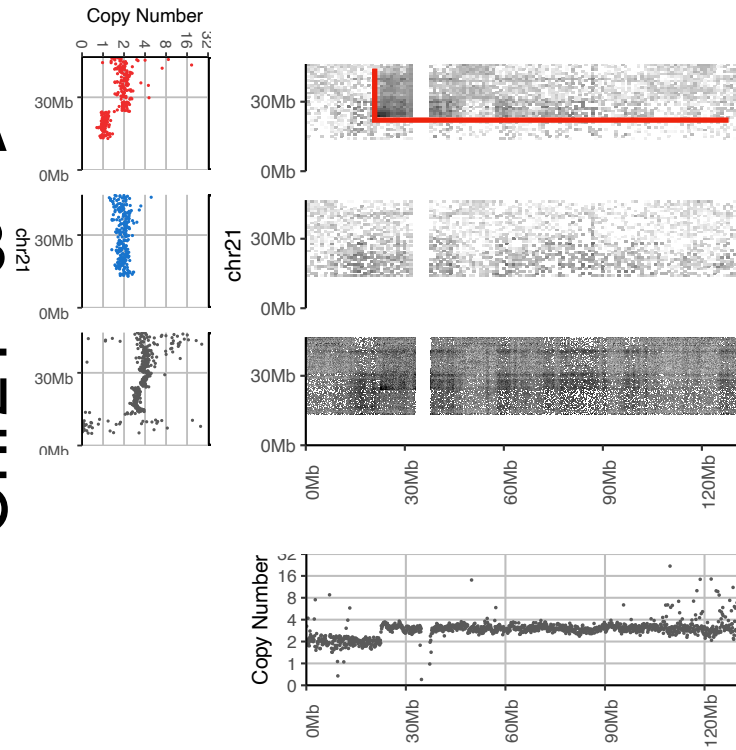

Chr12

B

A

# HiC

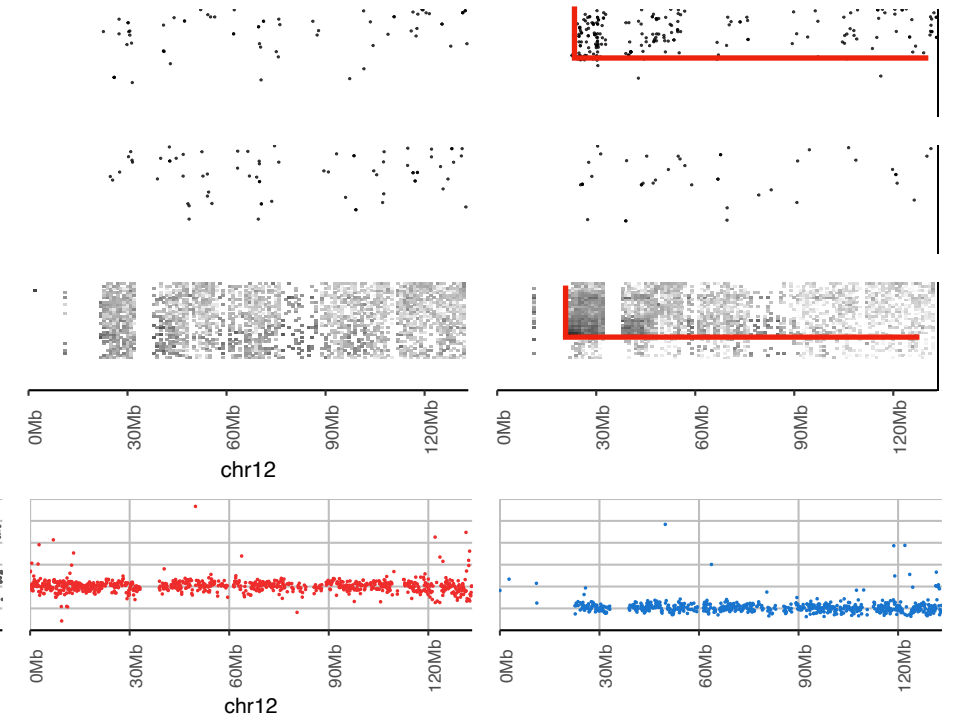

t(3A;10A)      t(3A;10A;17A)

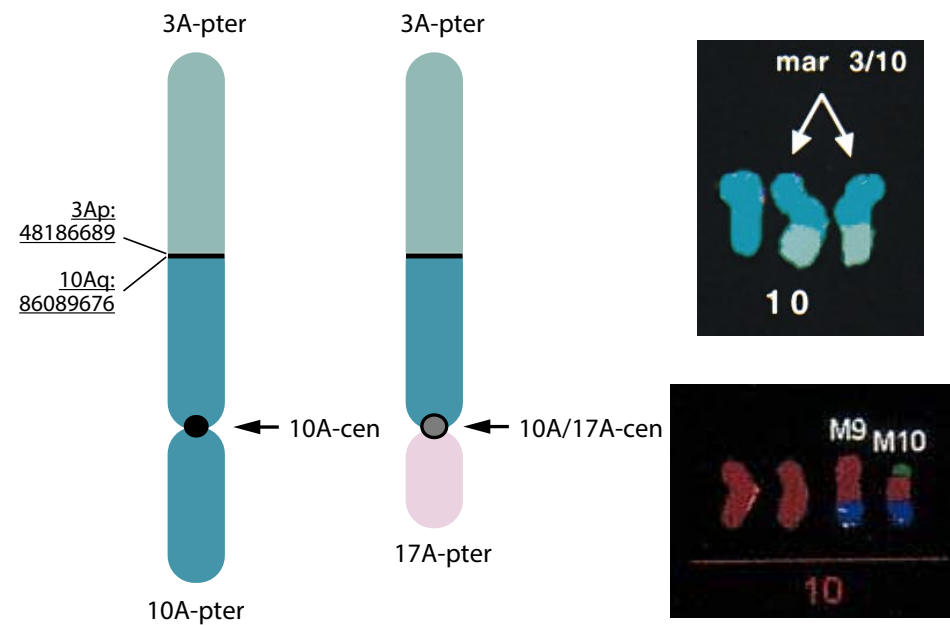

10X

chr3\_48186689---chr10\_86089676

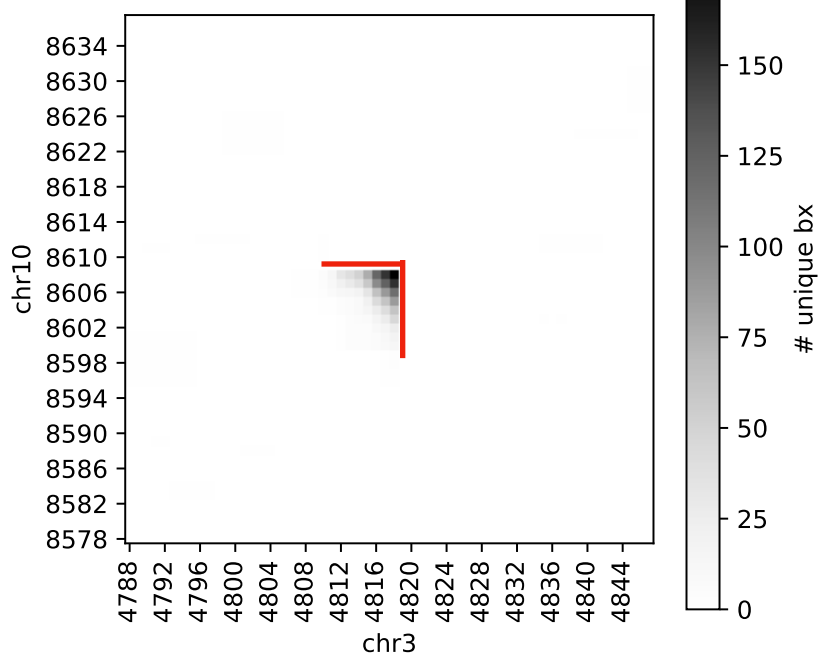

A

B

Chr10

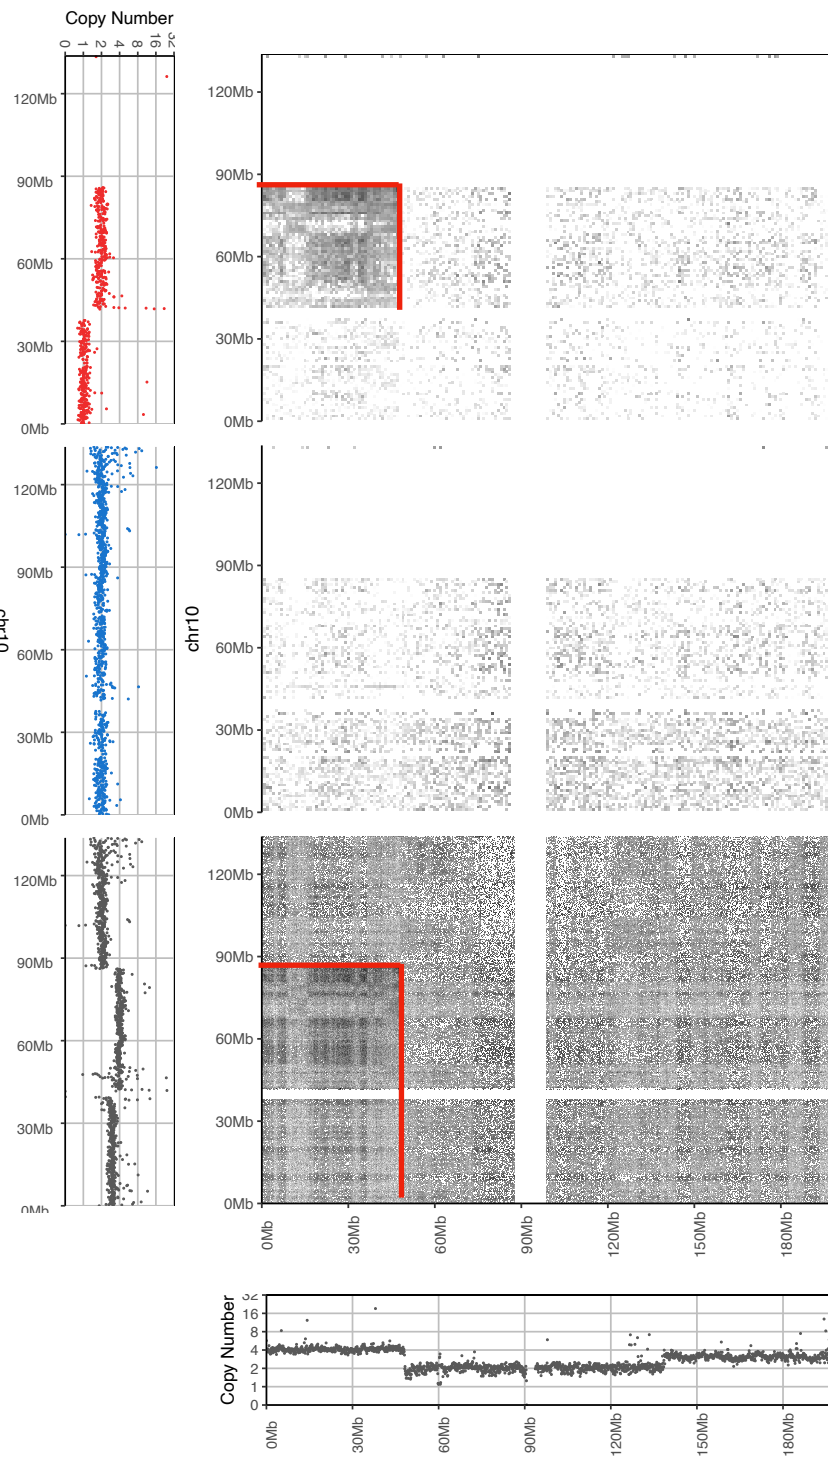

Chr3A

HiC

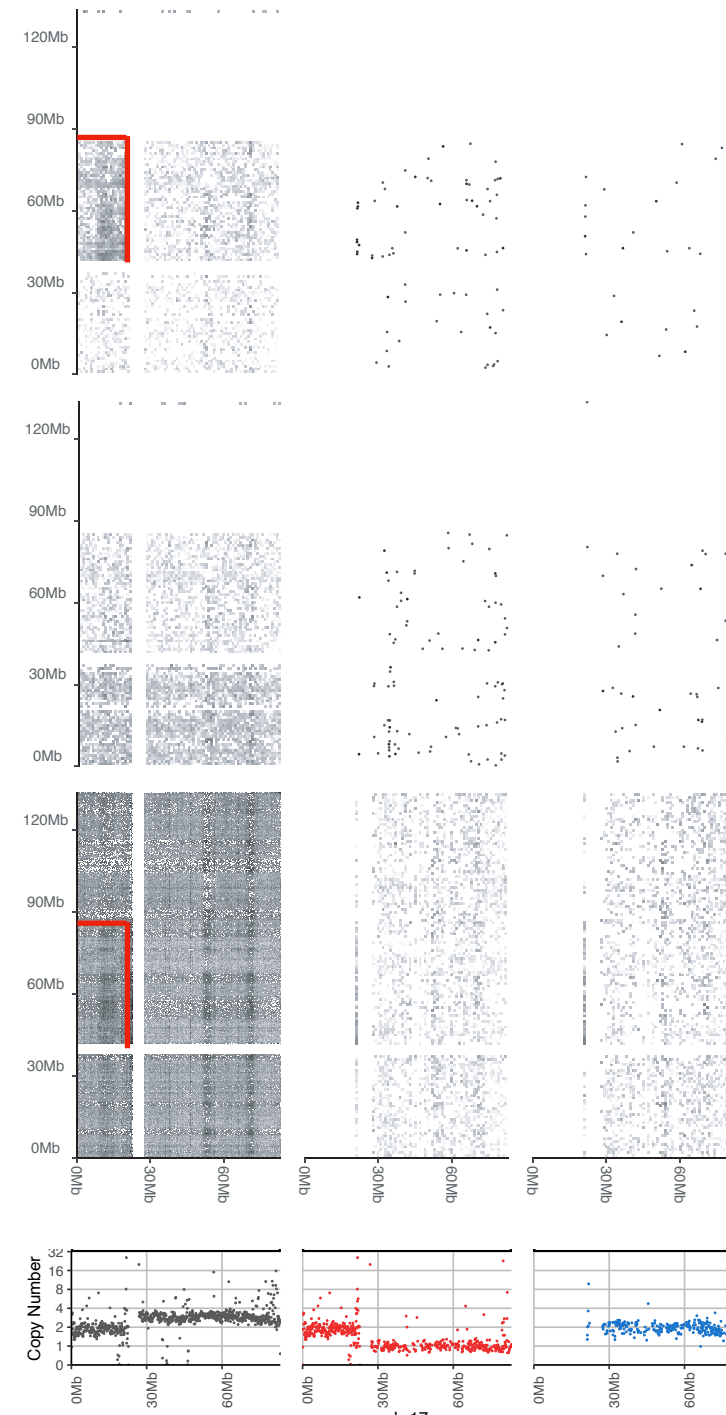

Chr17

A

B

# t(6A;16A; 6B)

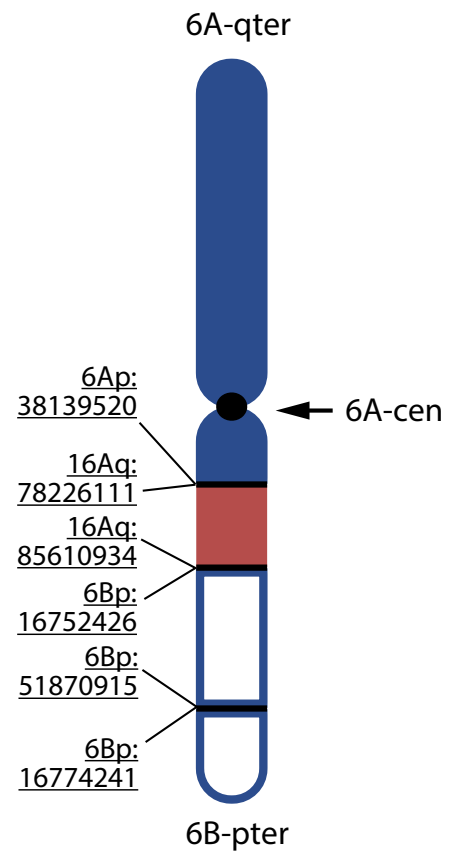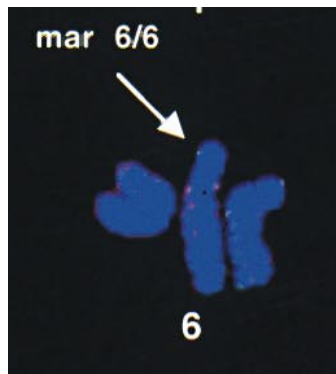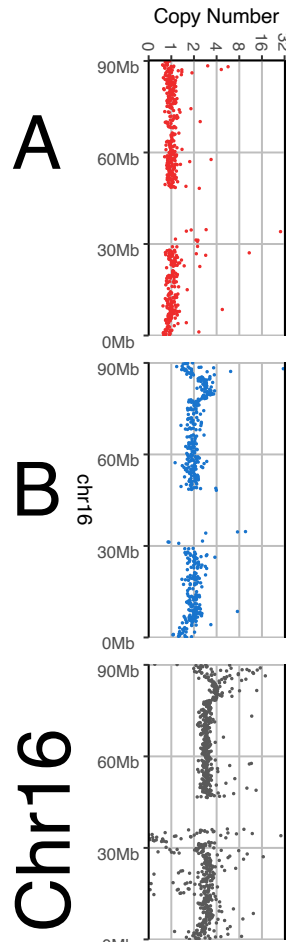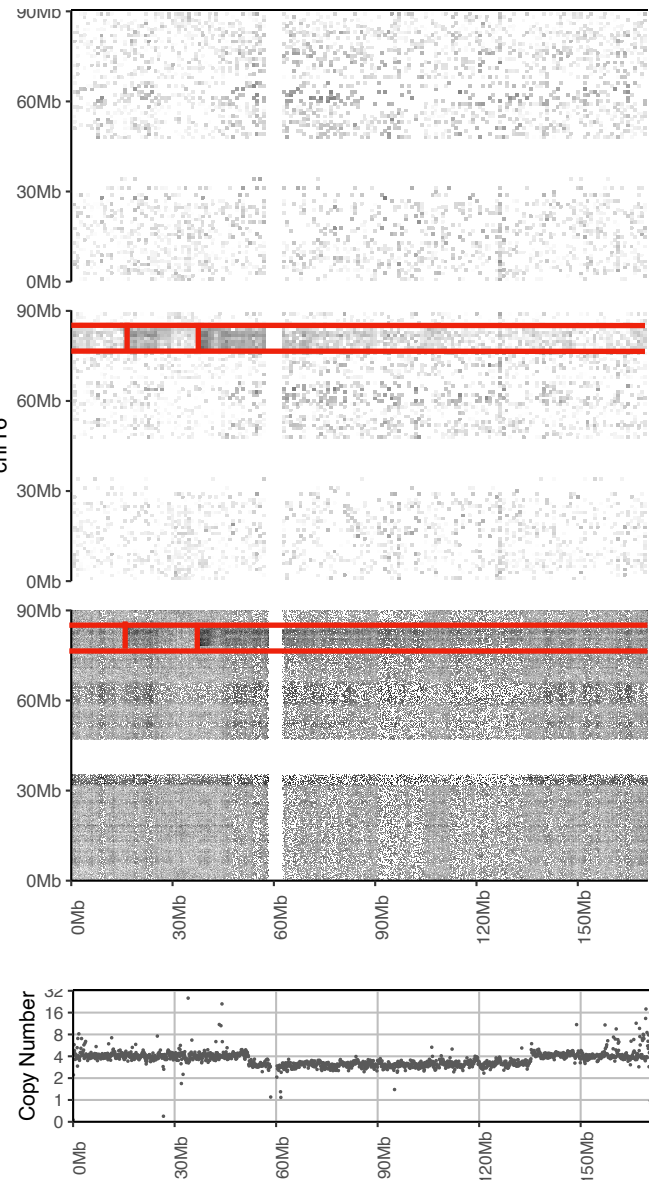

# HiC

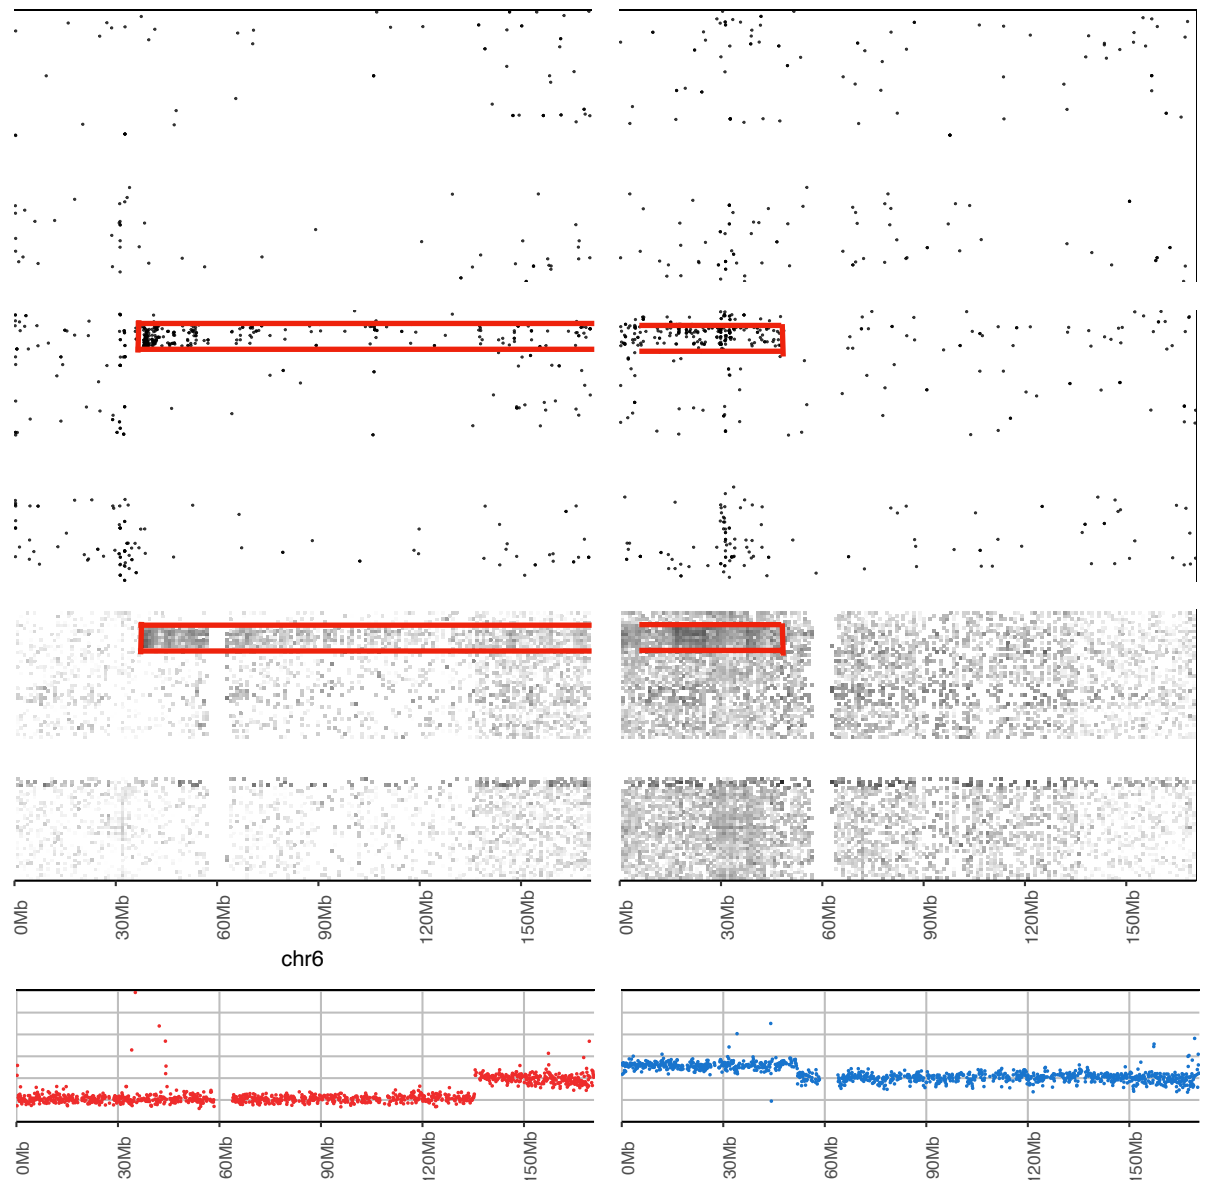

**Chr6**

**A**

**B**

# t(6A;16A; 6B)

# 10X

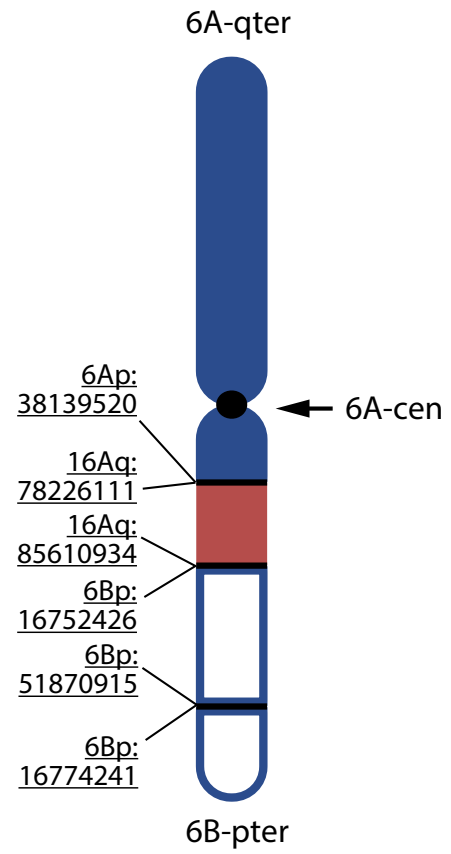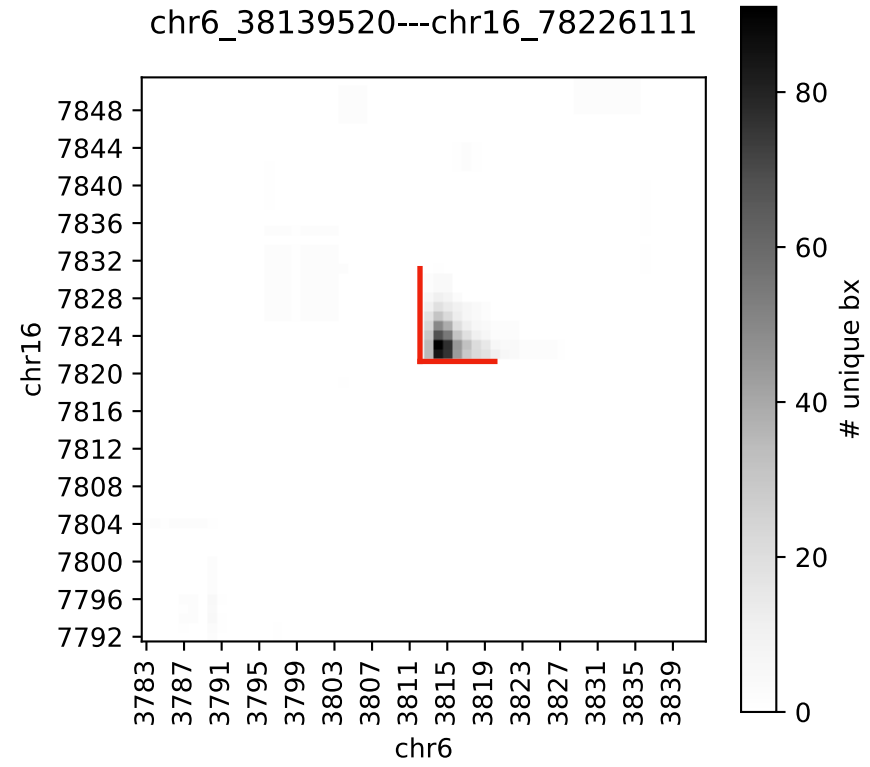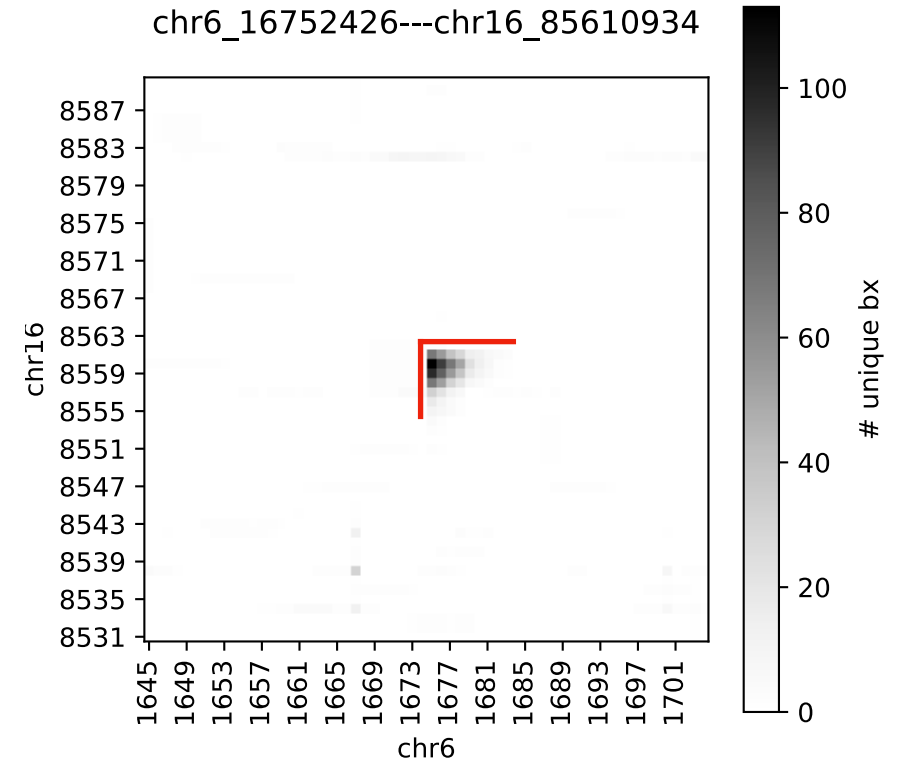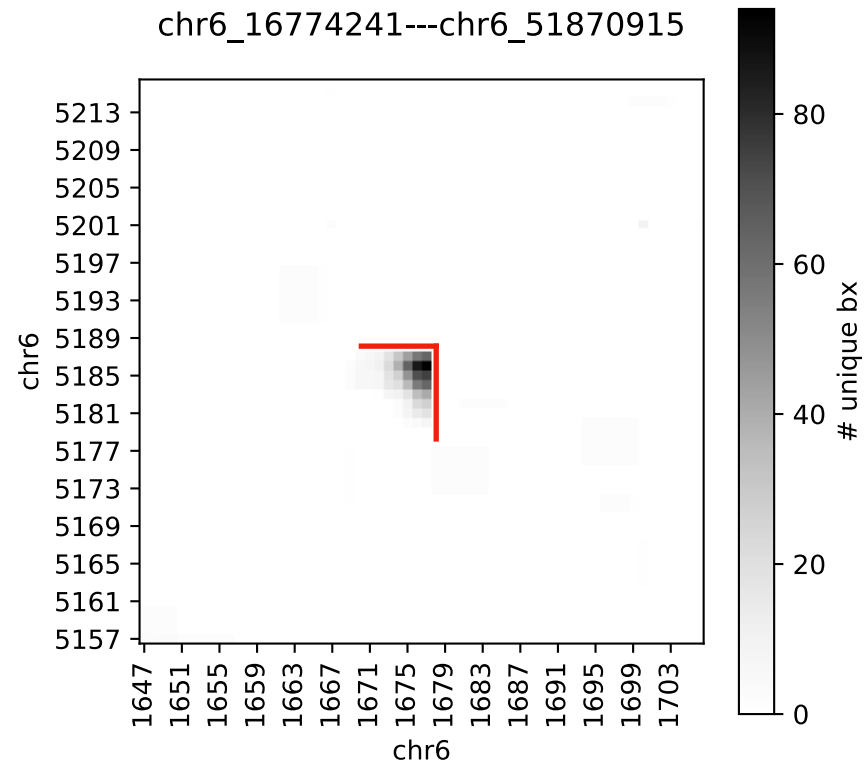



**Marker chromosomes  
with incompletely  
resolved translocations**

t(2A;22A)

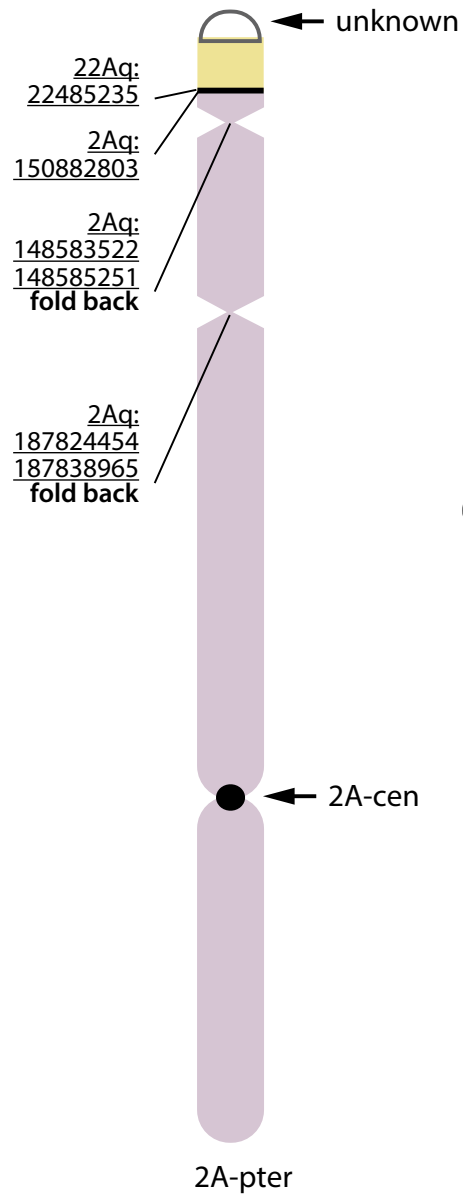

HiC

Chr22

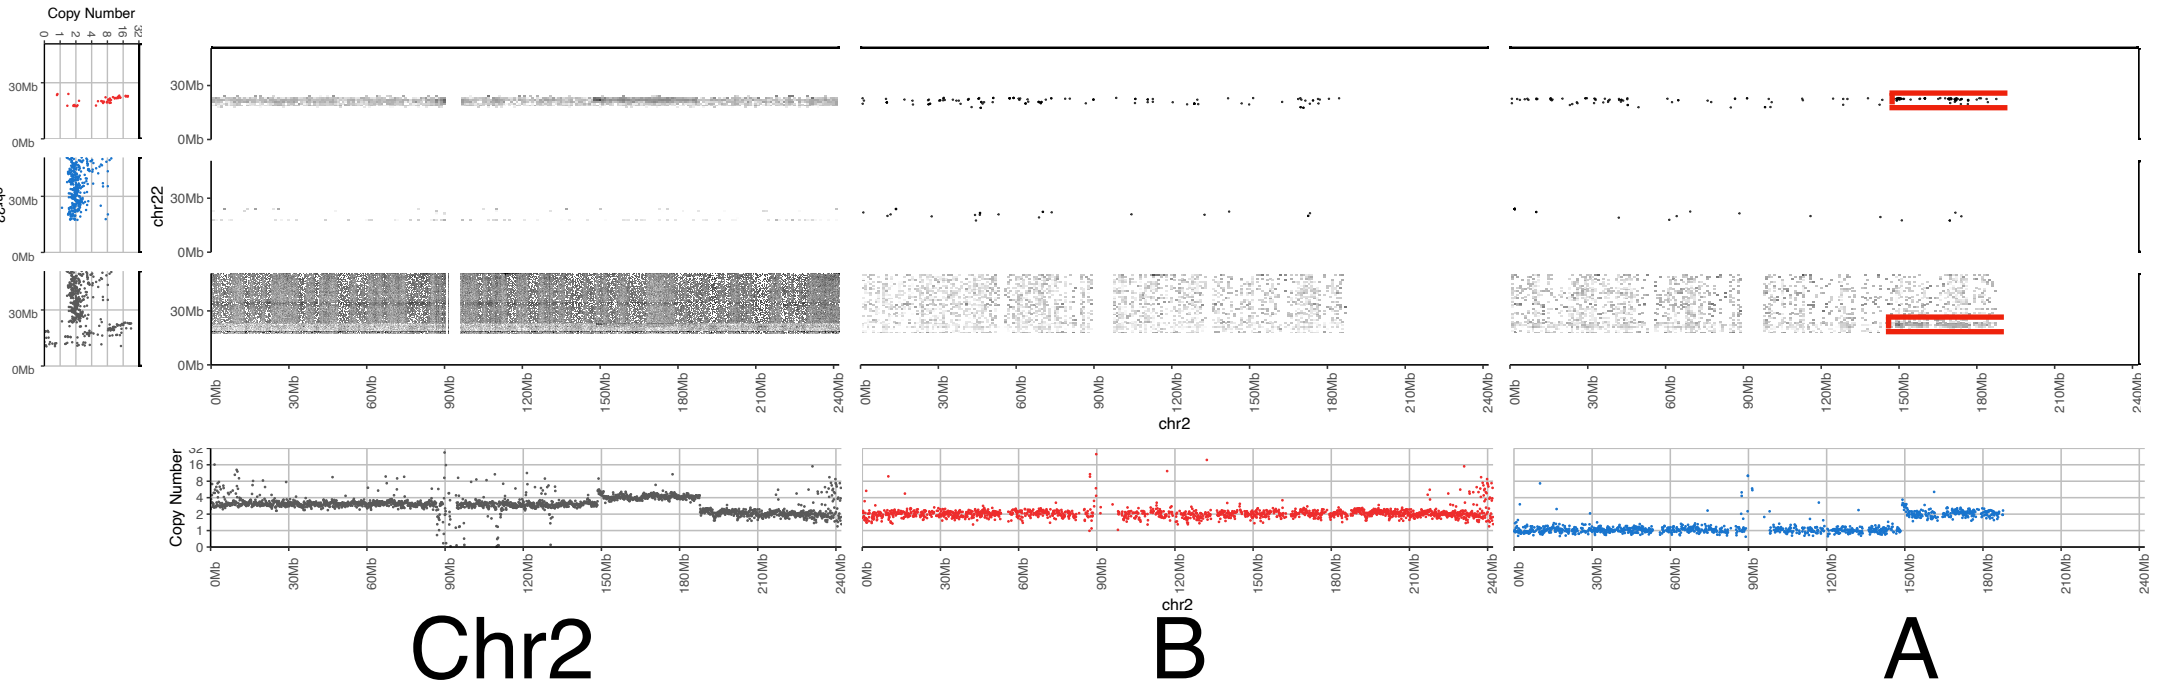

10X

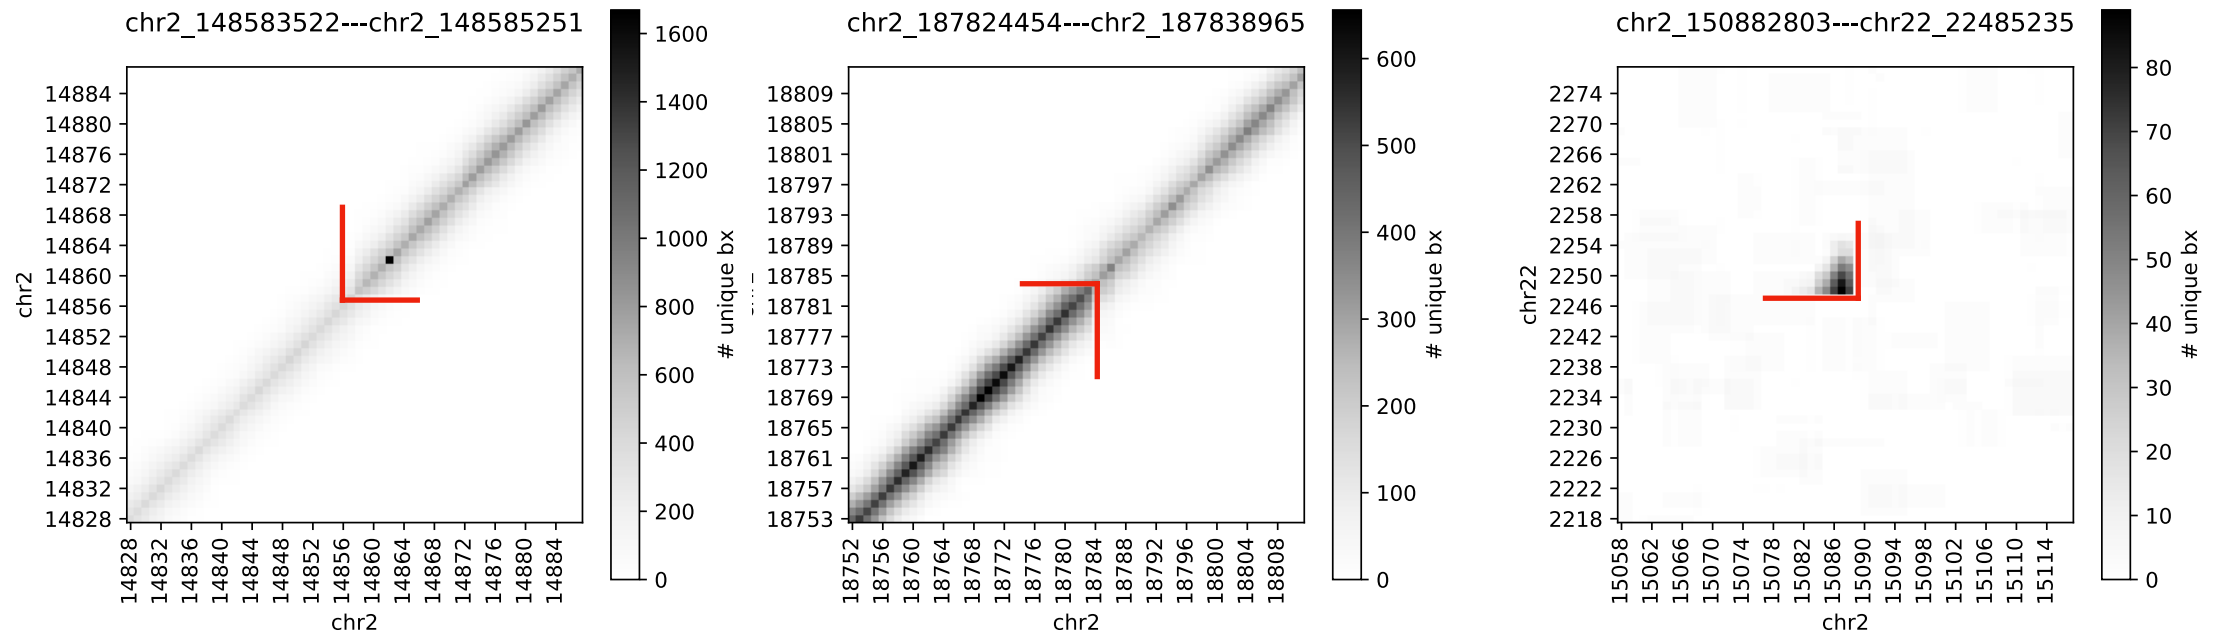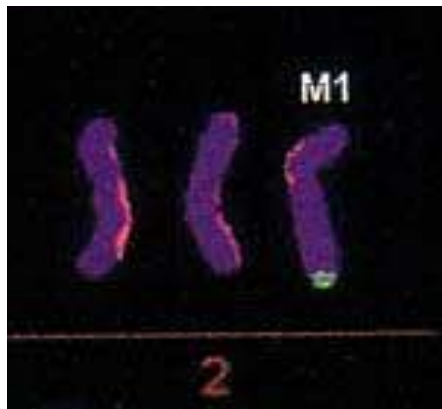

t(1B;21B)

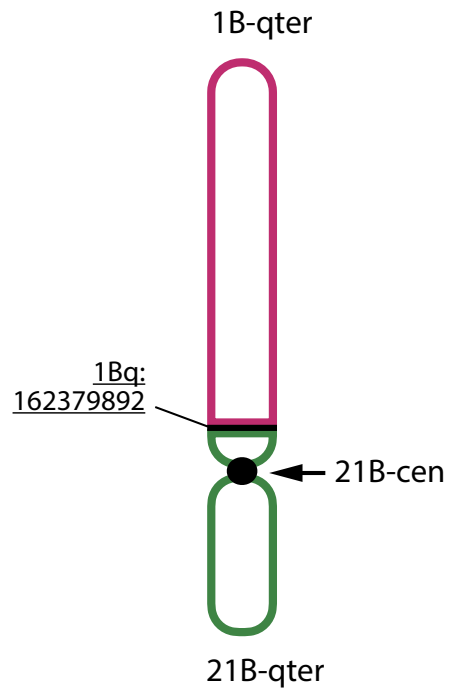

A  
B  
Chr21

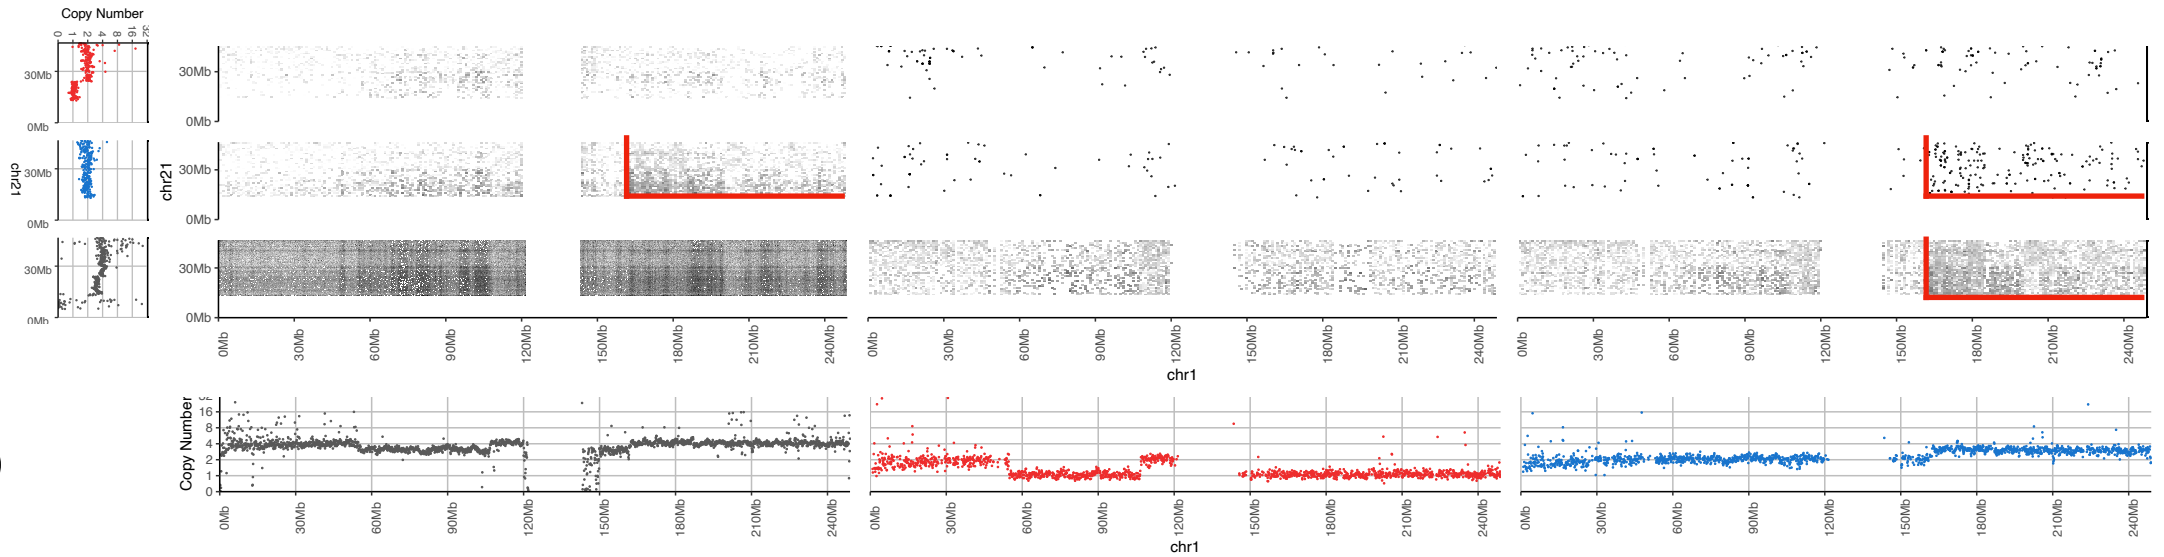

Chr1

A

B

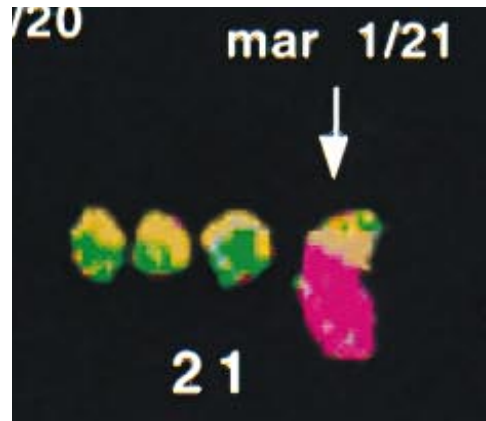

# t(6A;1A; 20A)

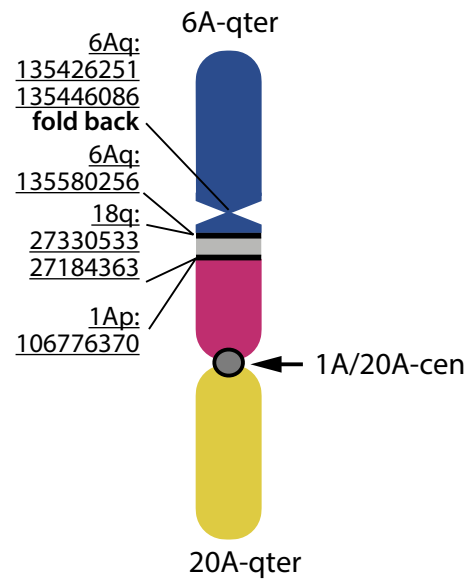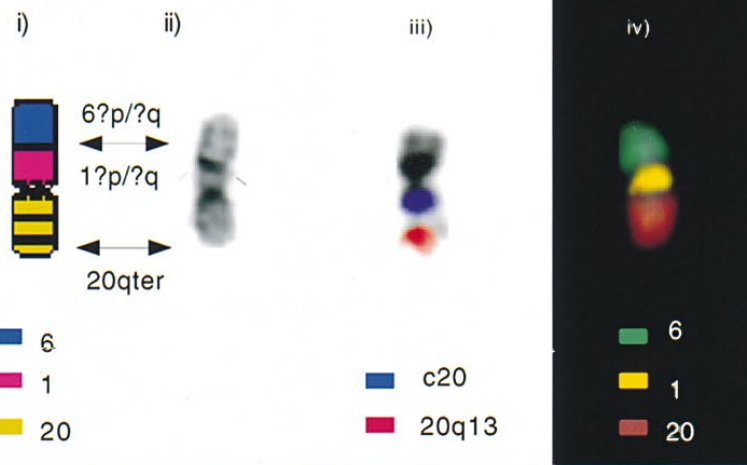

# HiC

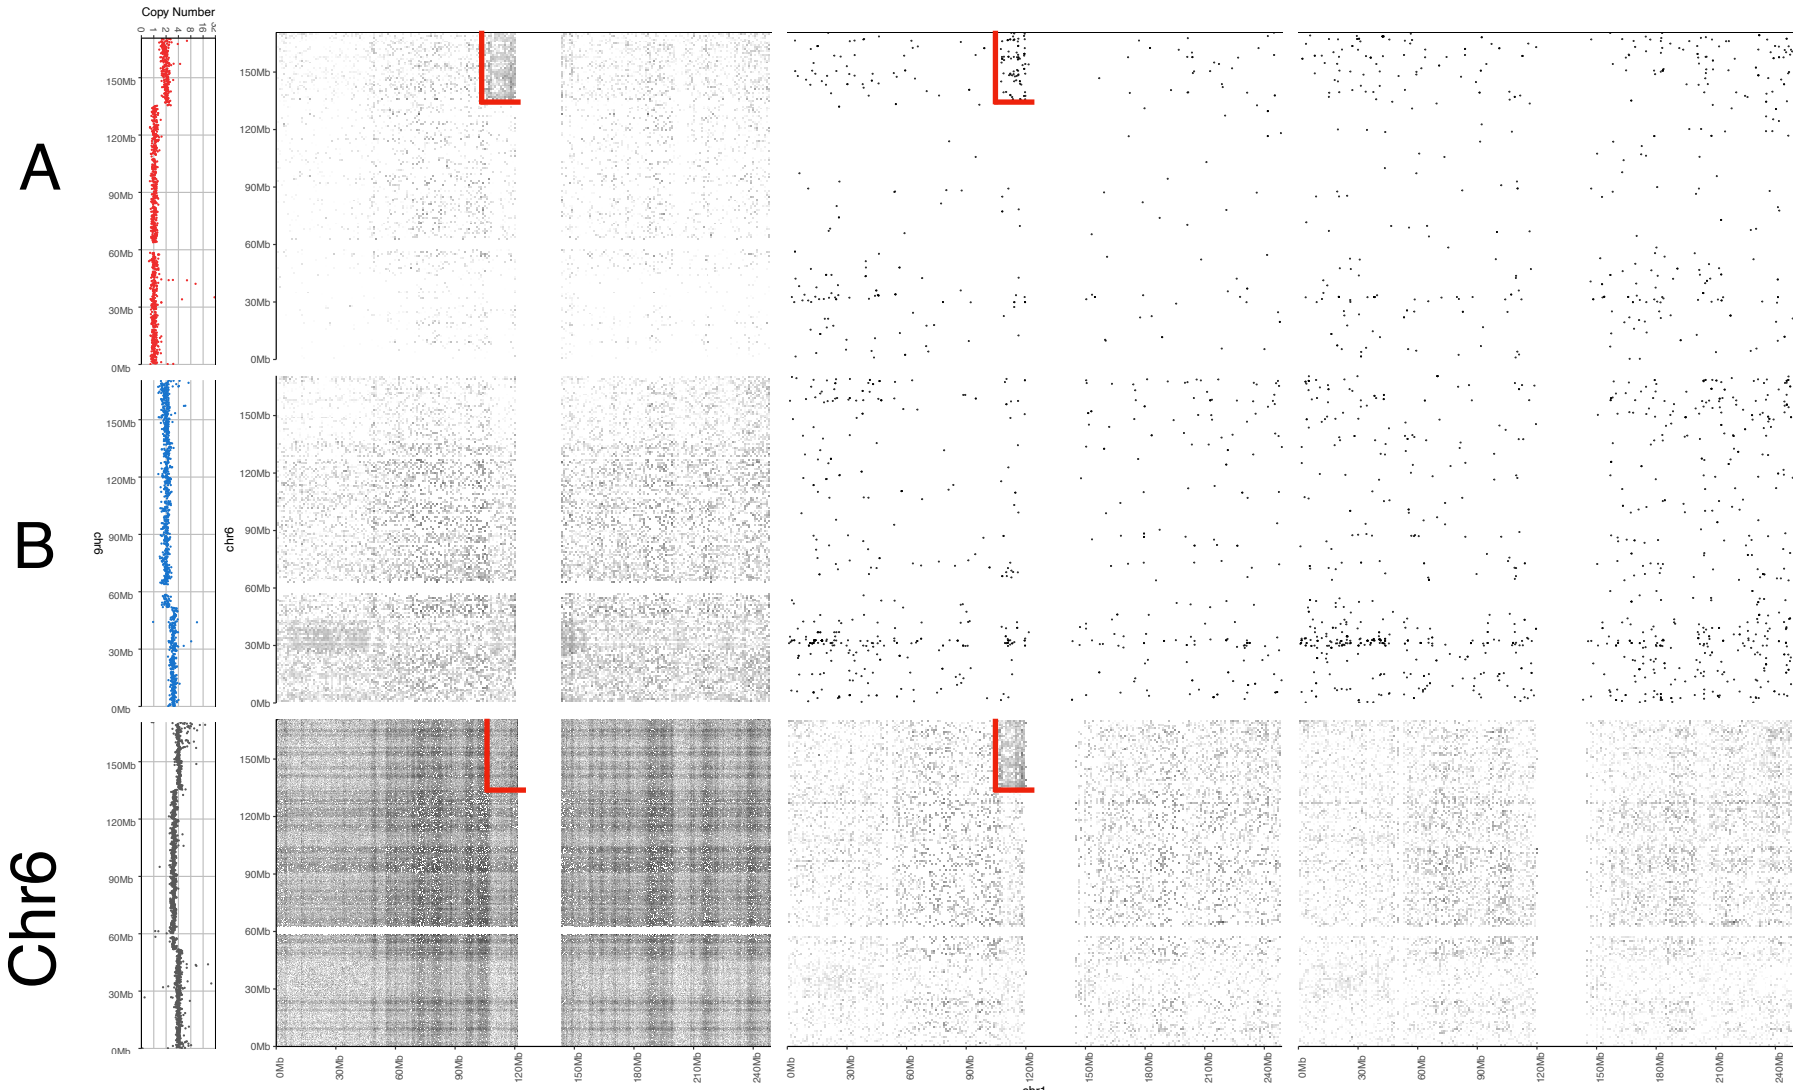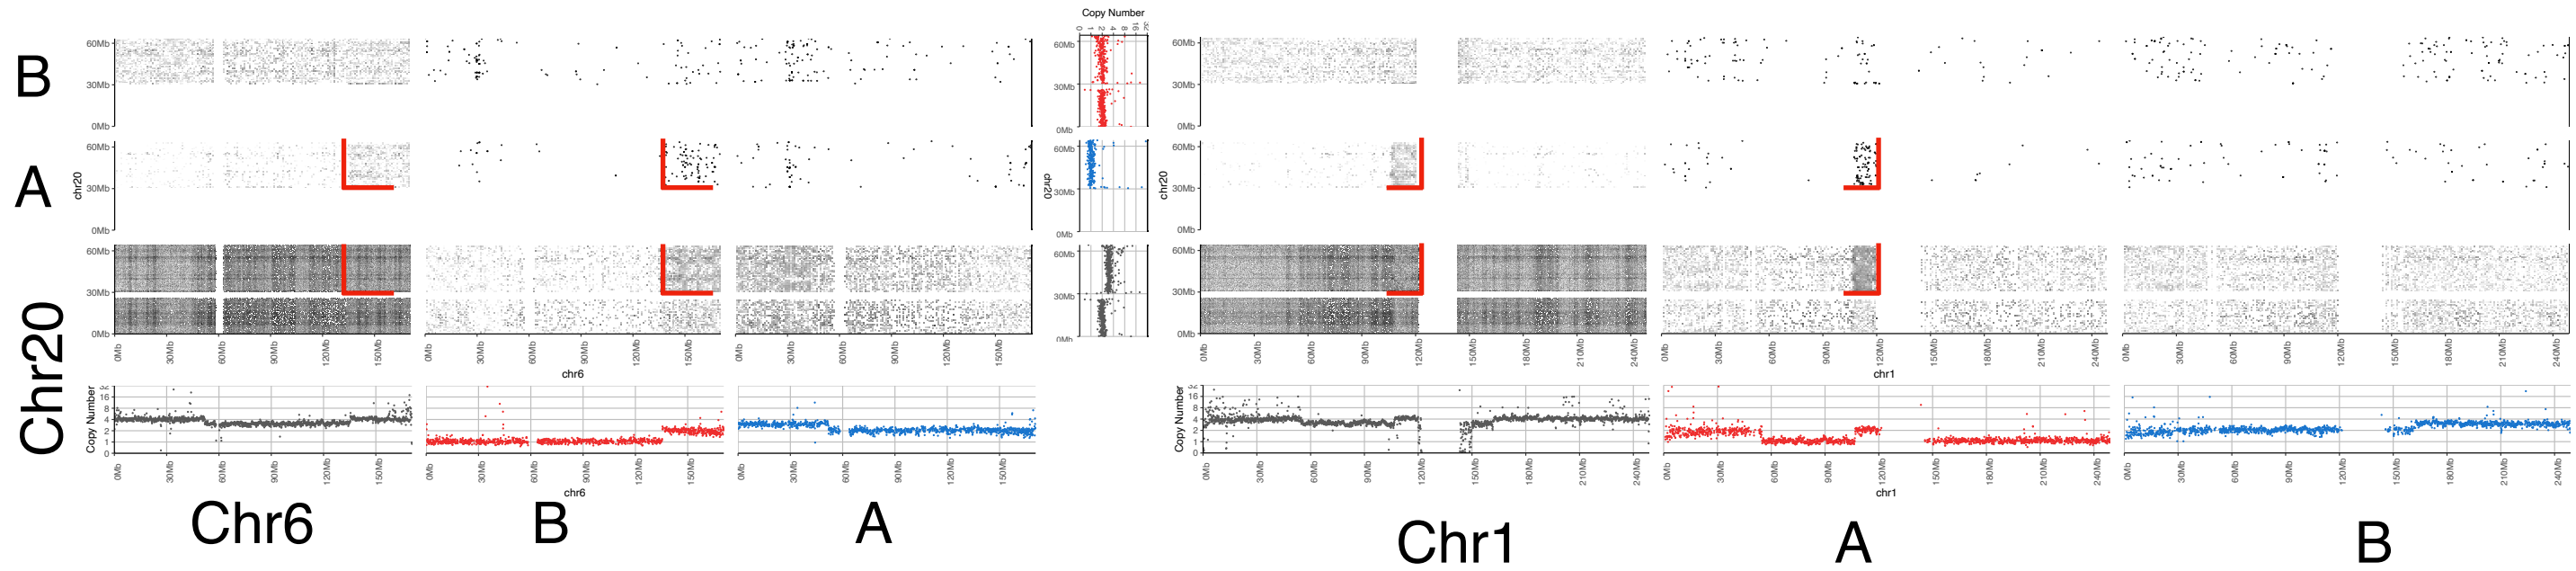

# t(6A;1A; 20A)

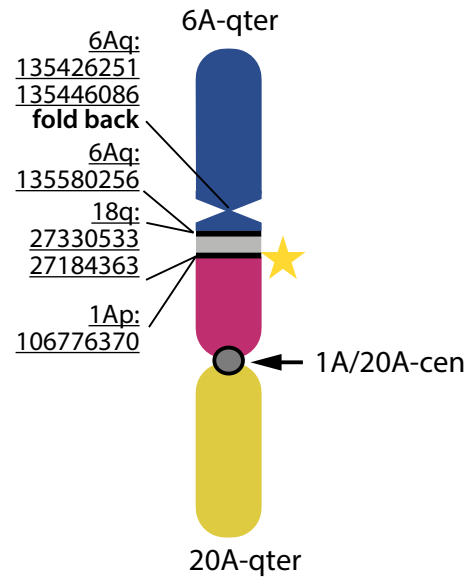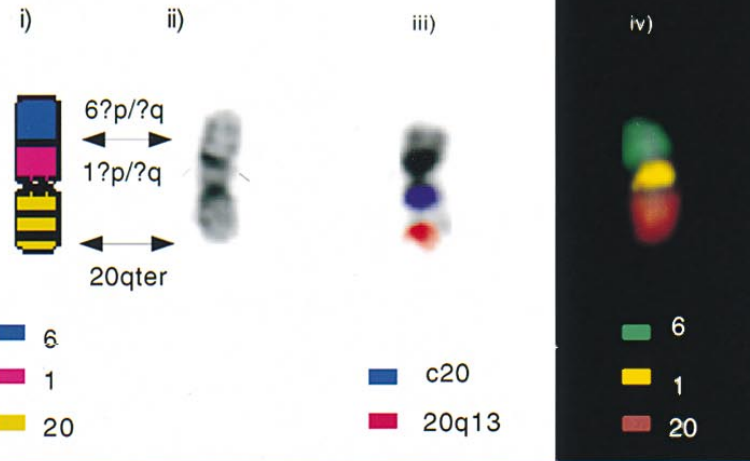

# 10X

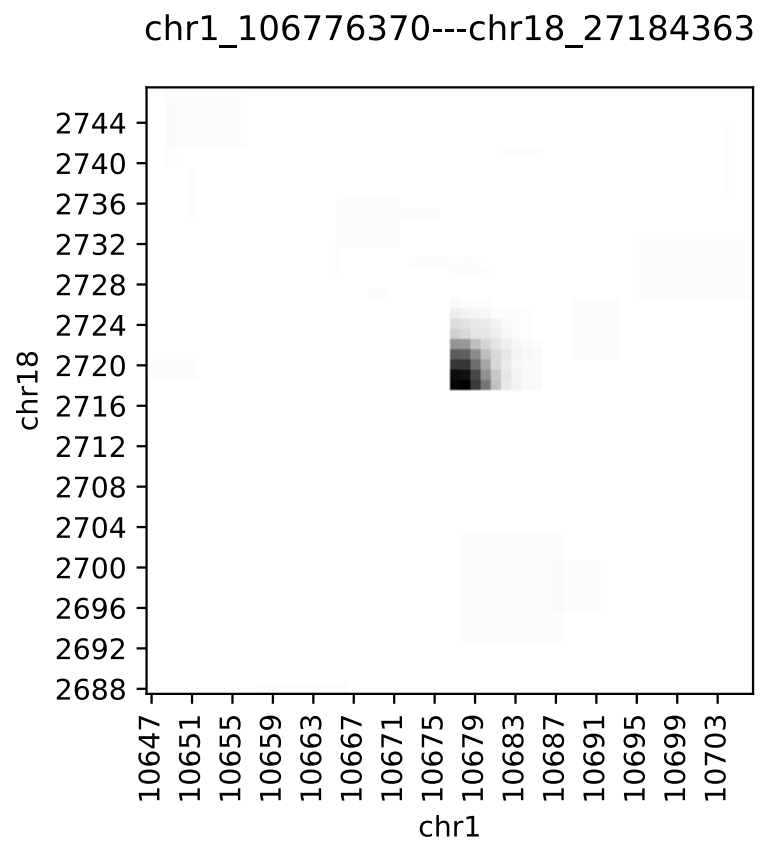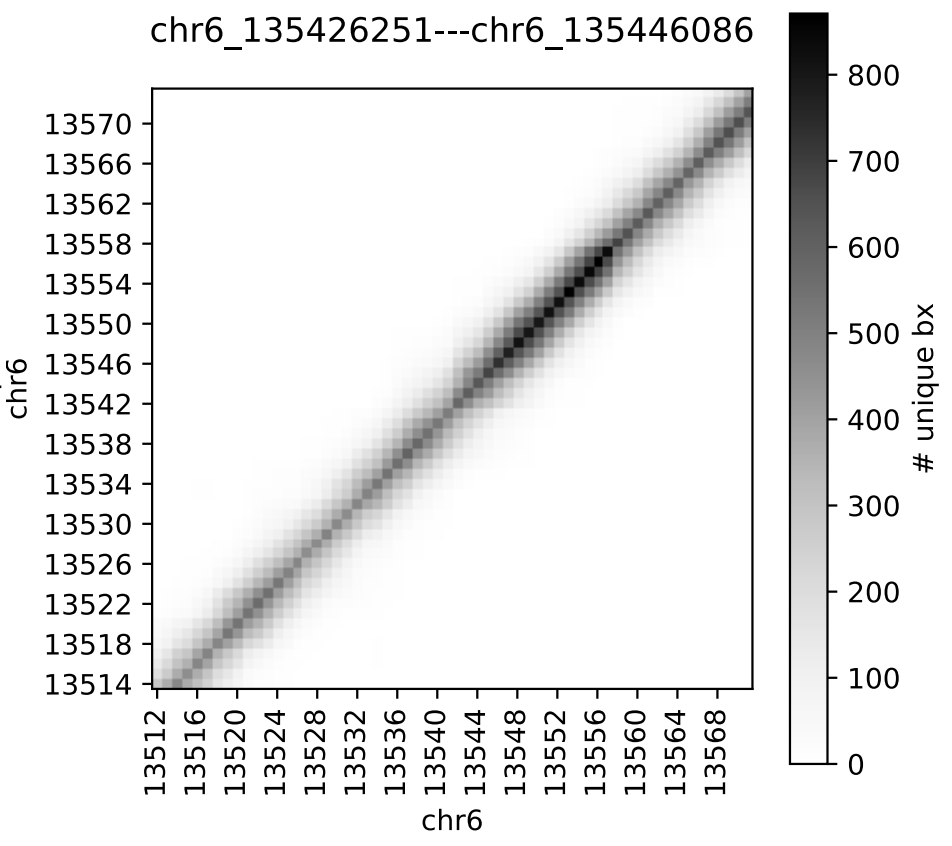

### t(1A;18A)

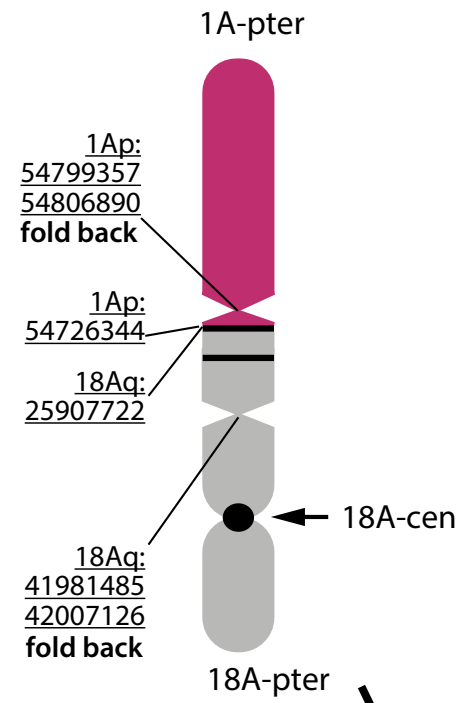

### t(6A;1A; 20A)

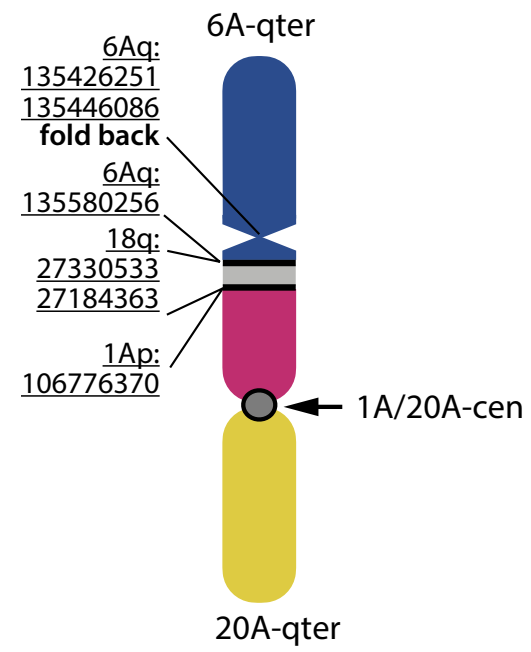

### t(3A;18B)

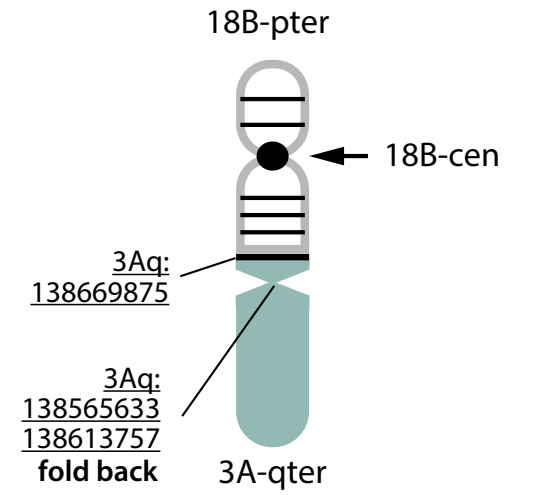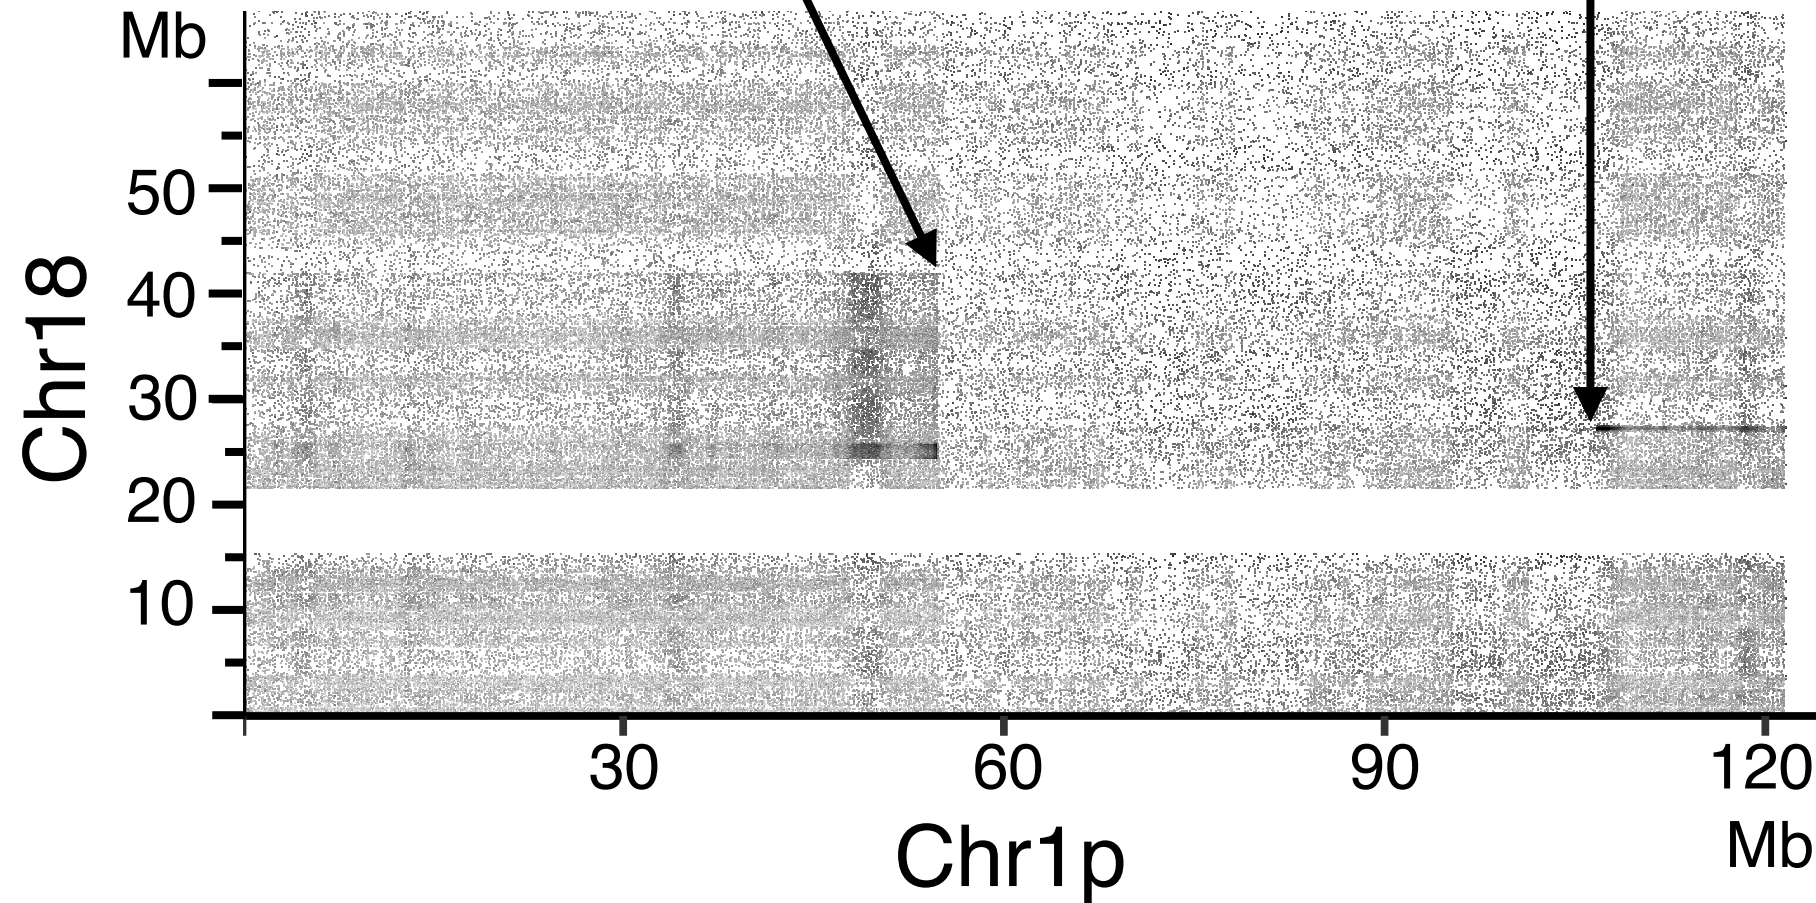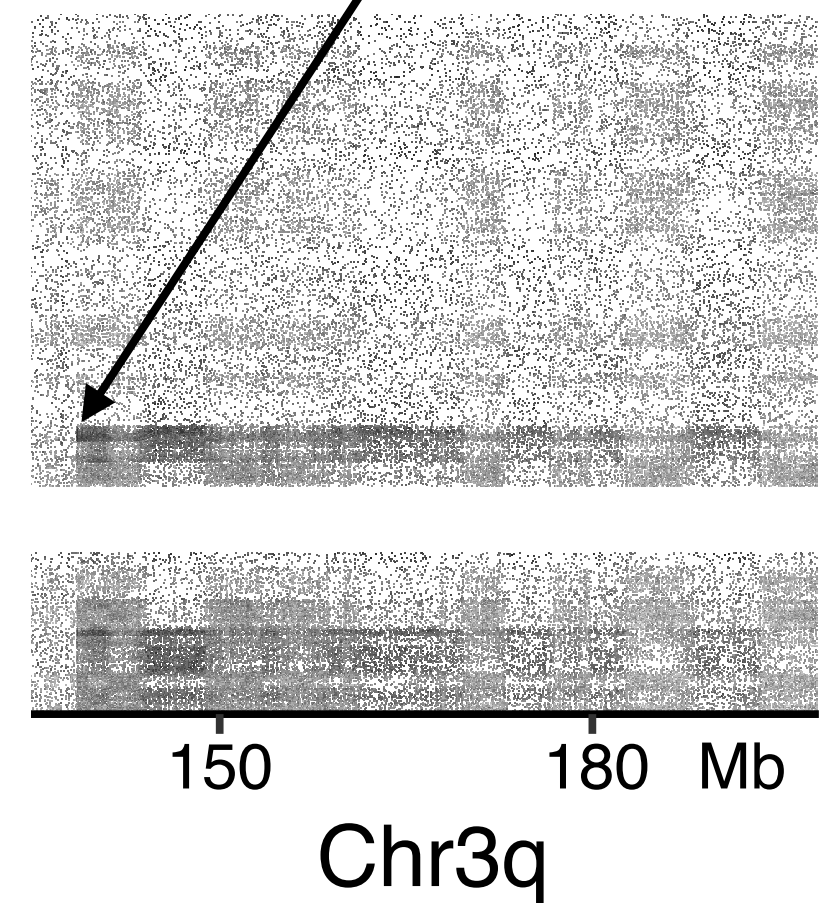

t(1A;18A)

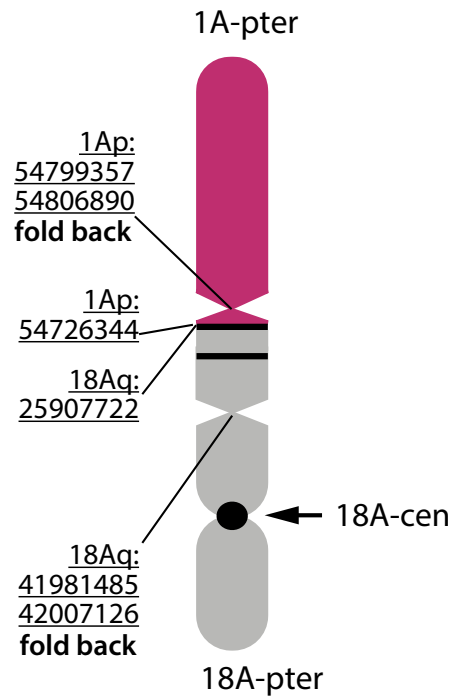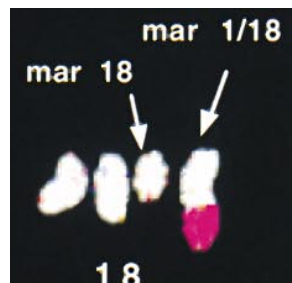

A

B

Chr18

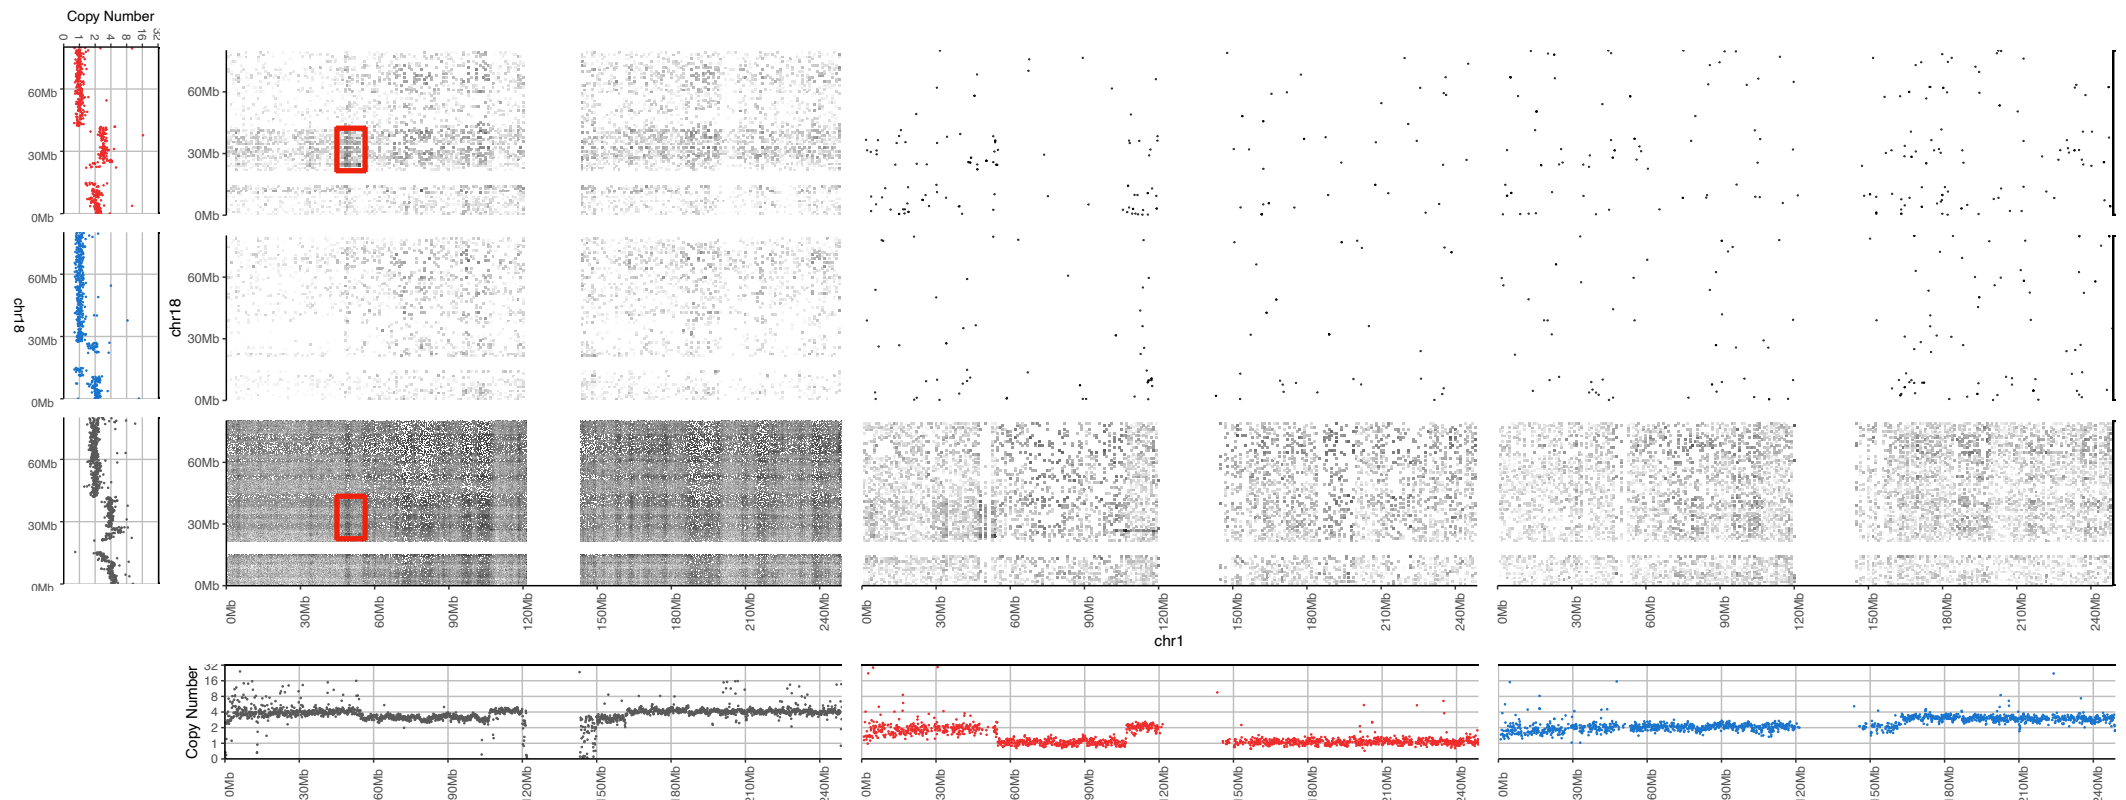

Chr1

A

B

10X

chr1\_54799357---chr1\_54806890

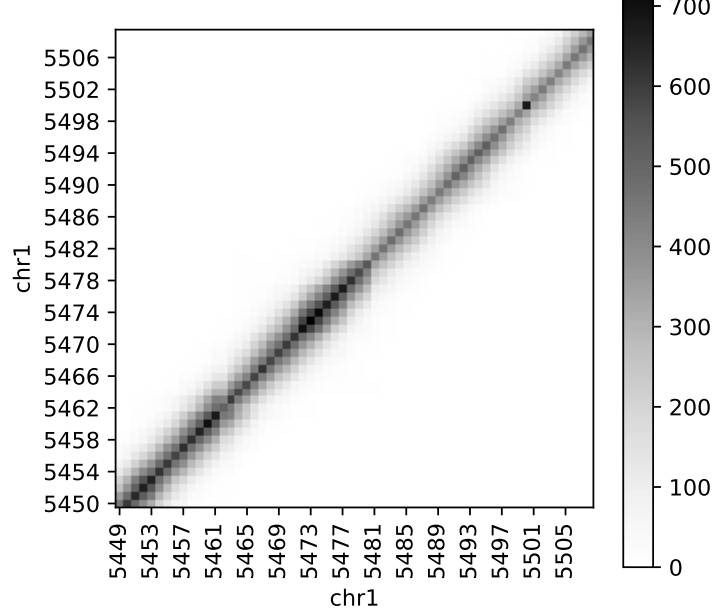

chr1\_54726344---chr18\_25907722

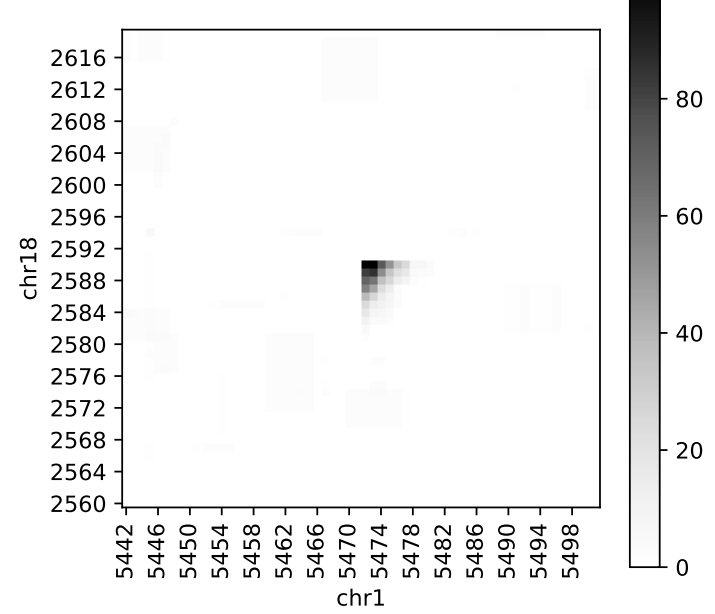

chr18\_26974525---chr18\_26977597

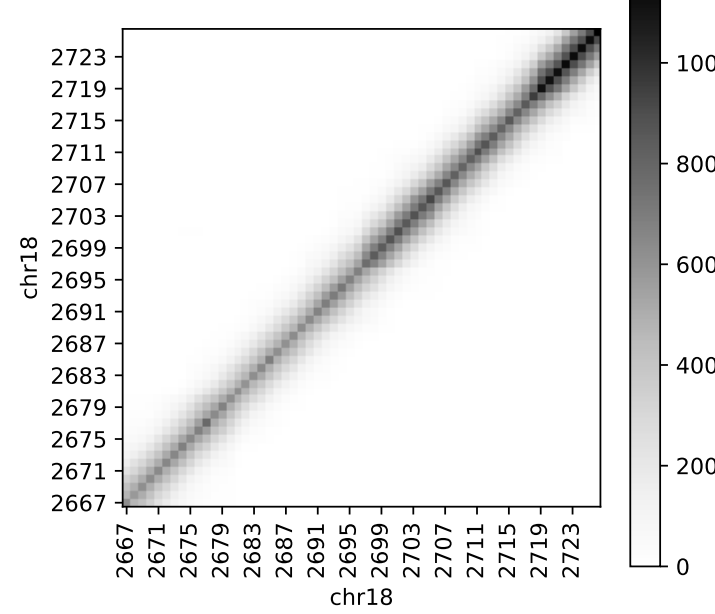

chr18\_41981485---chr18\_42007126

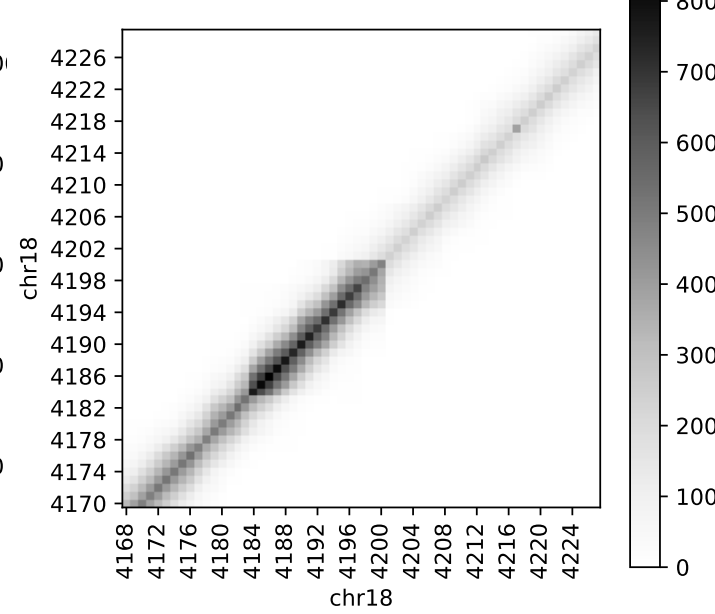

# t(3A;18B)

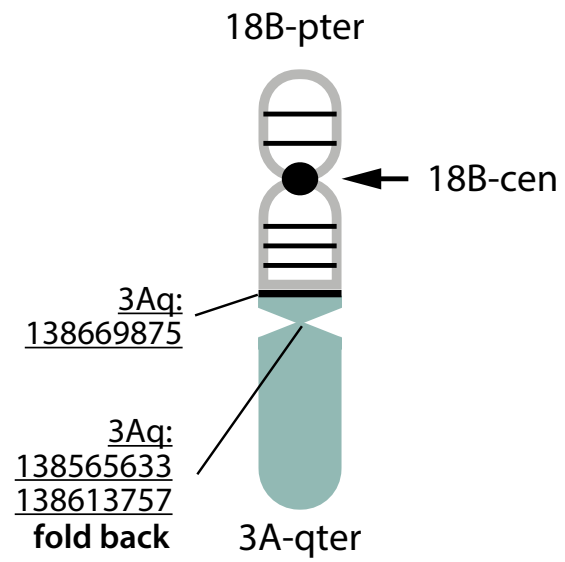

# 10X

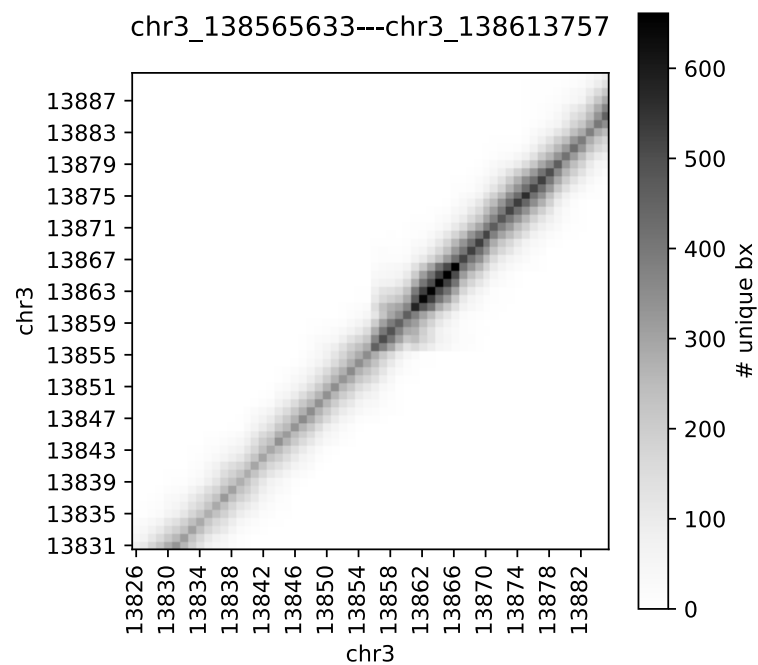

# HiC

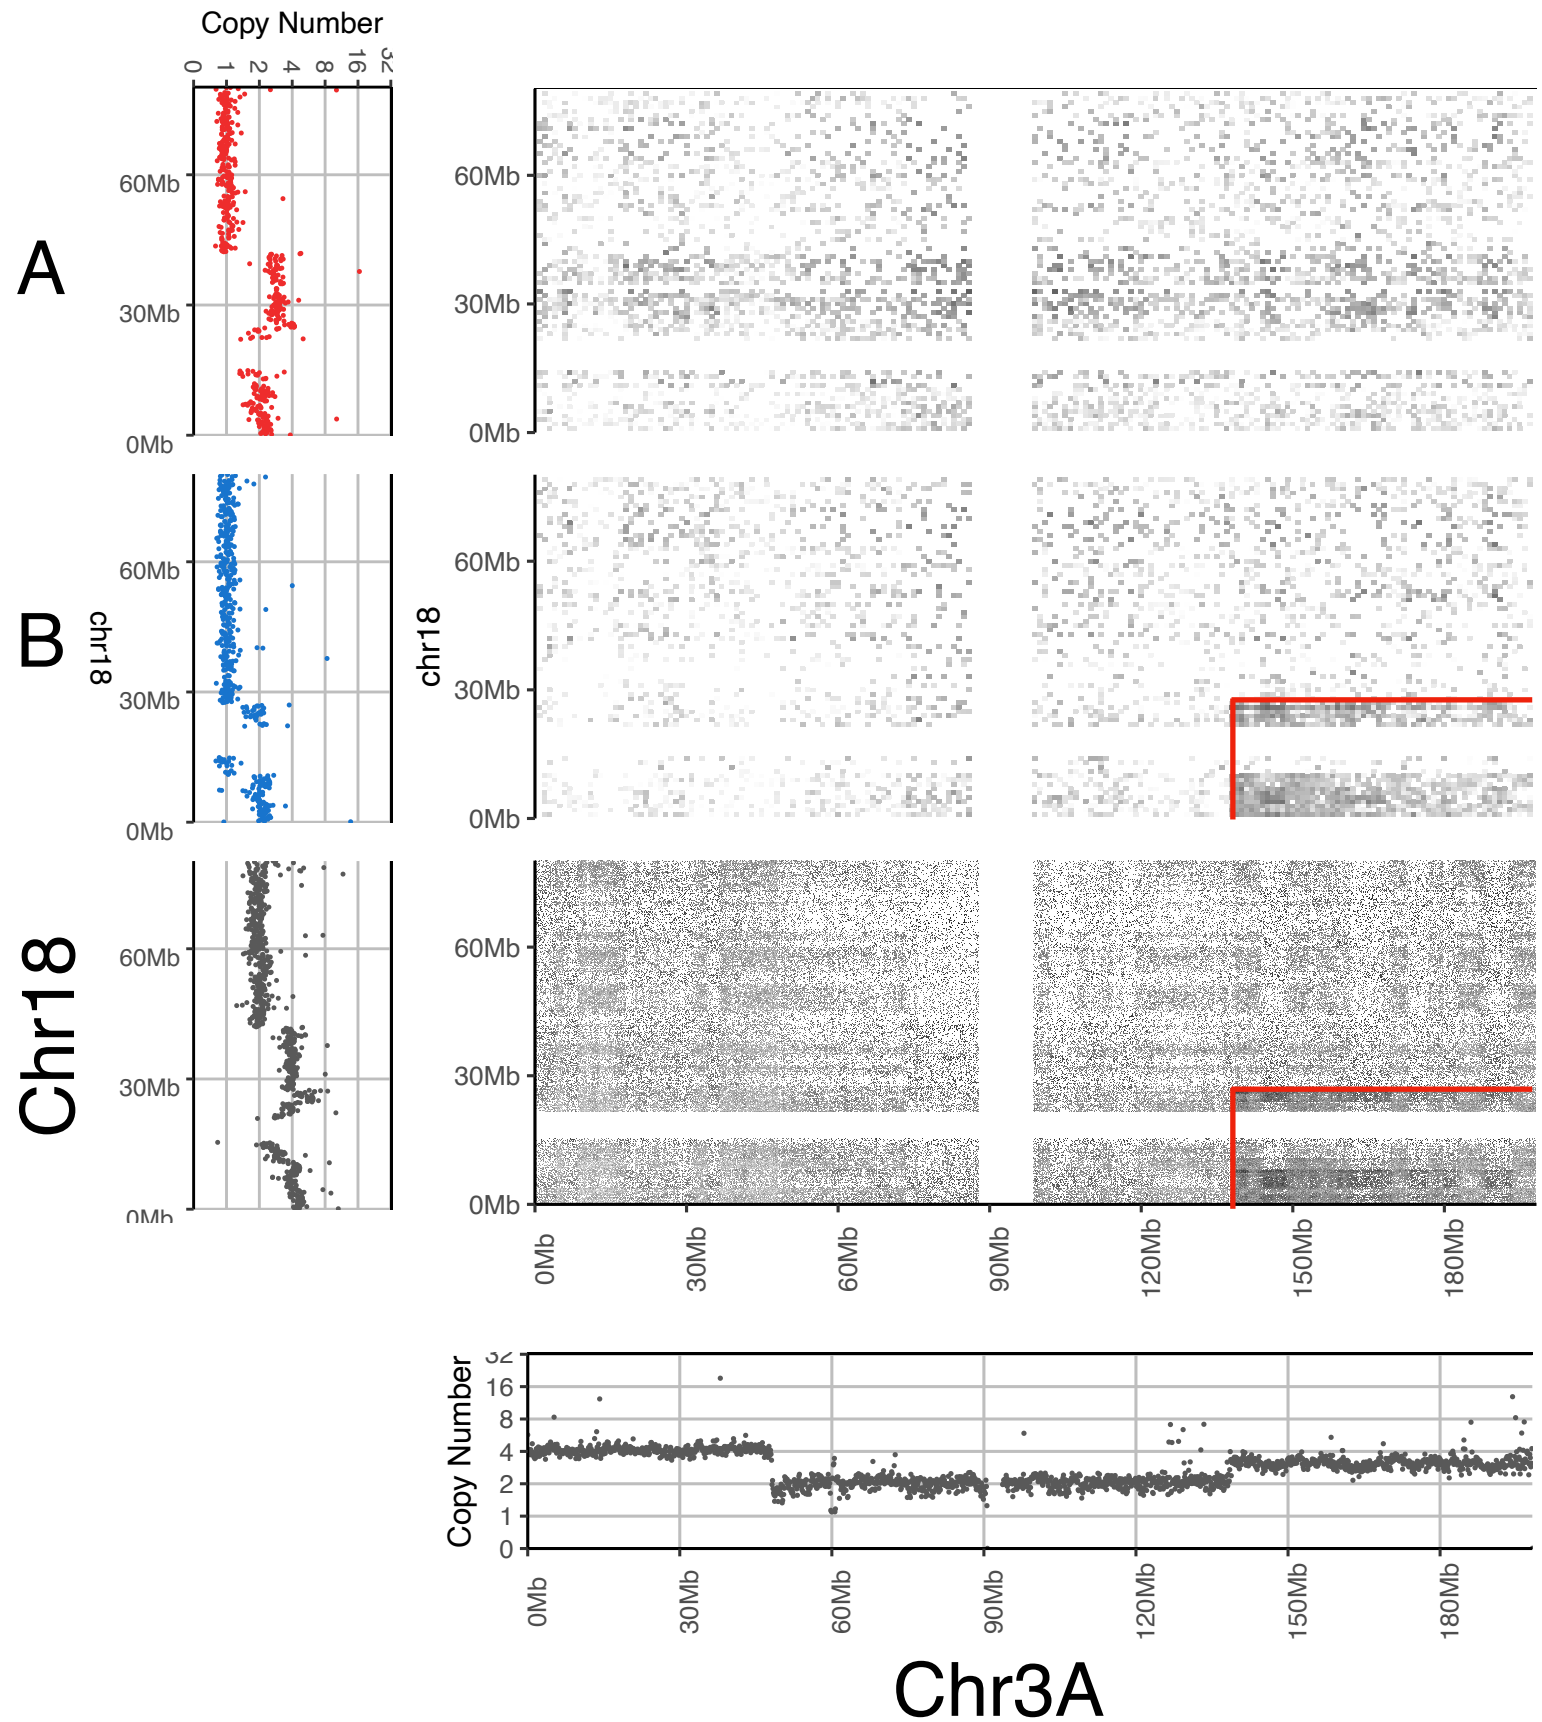



# t(3A;18B)

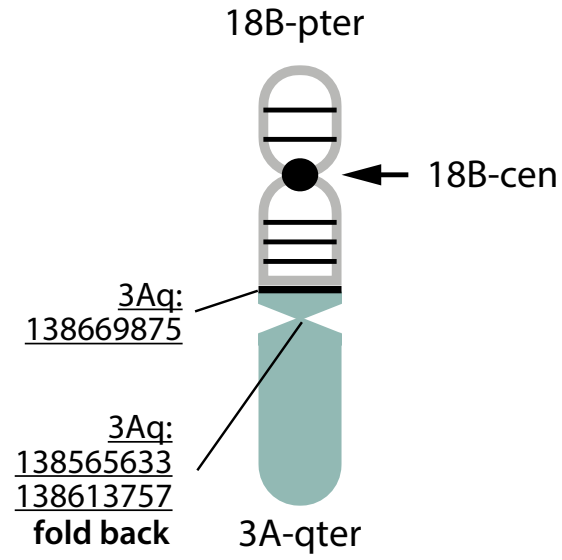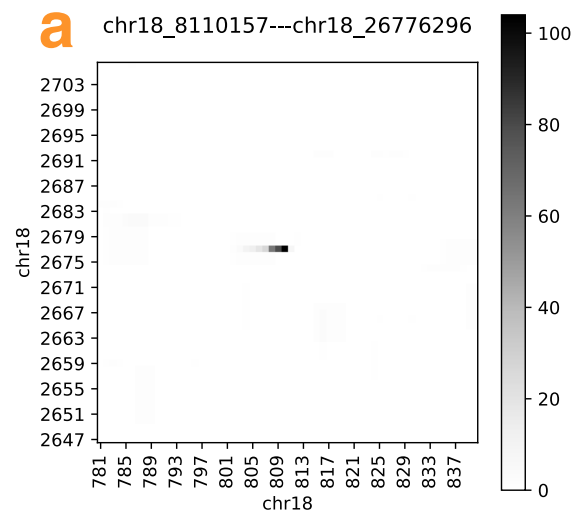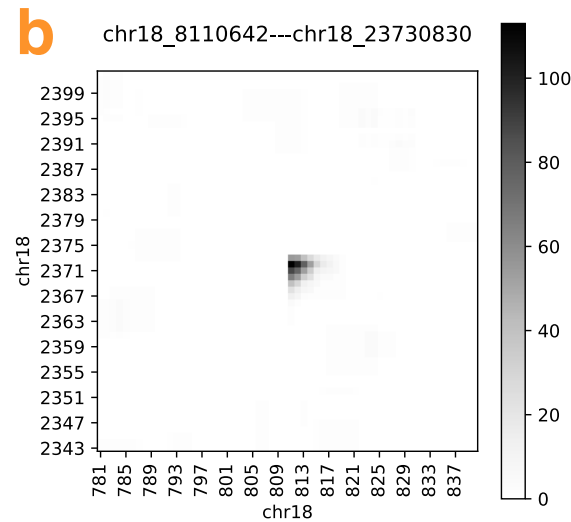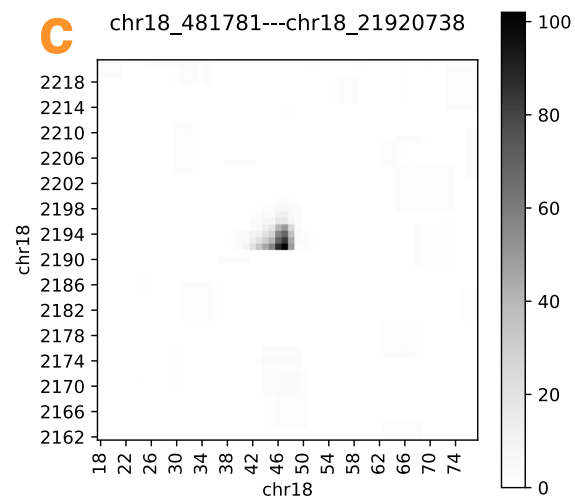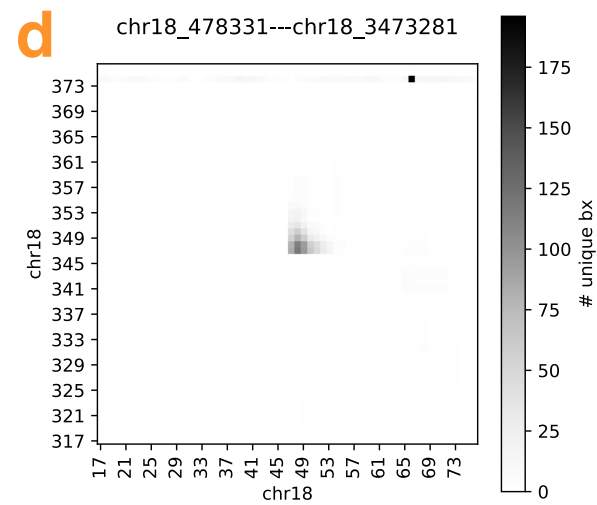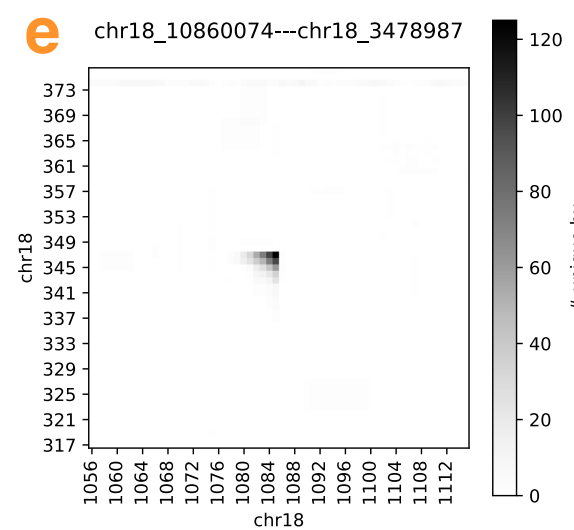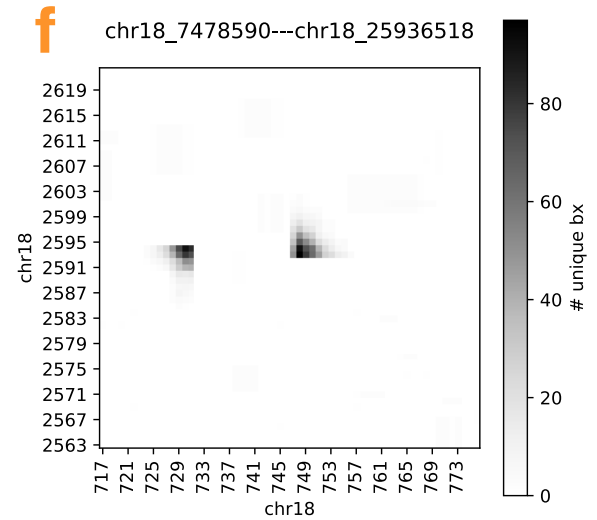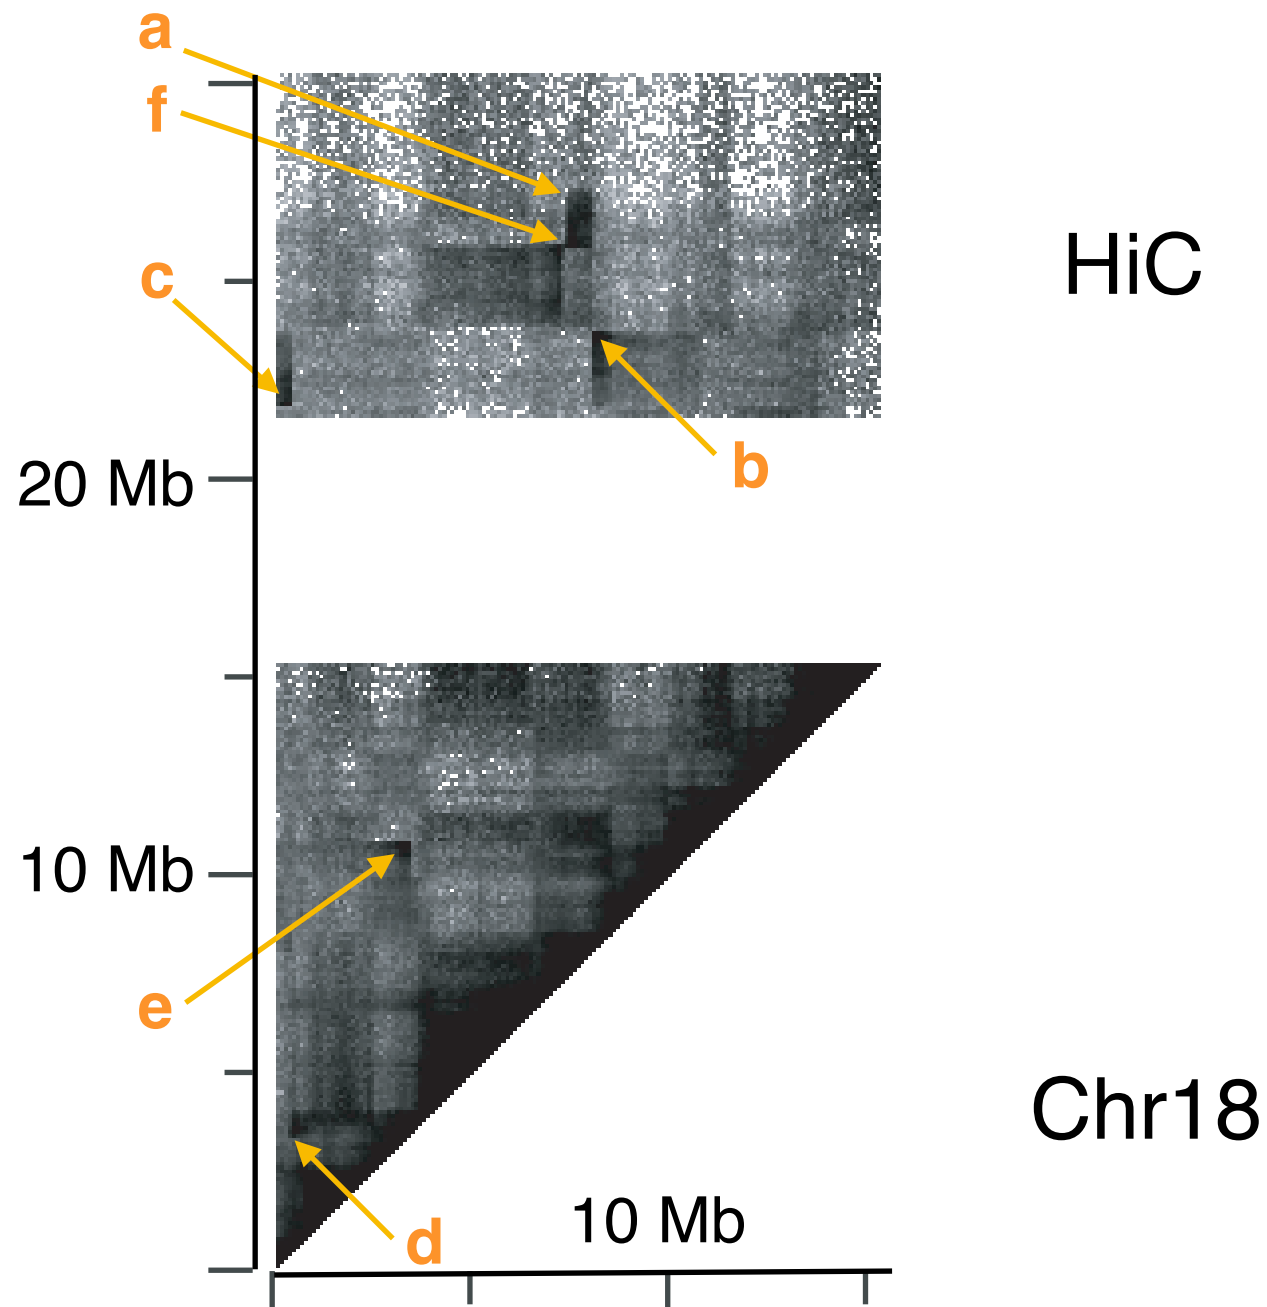

# Chromosomal copy number & rearrangements

Chr.18  
• A  
• B

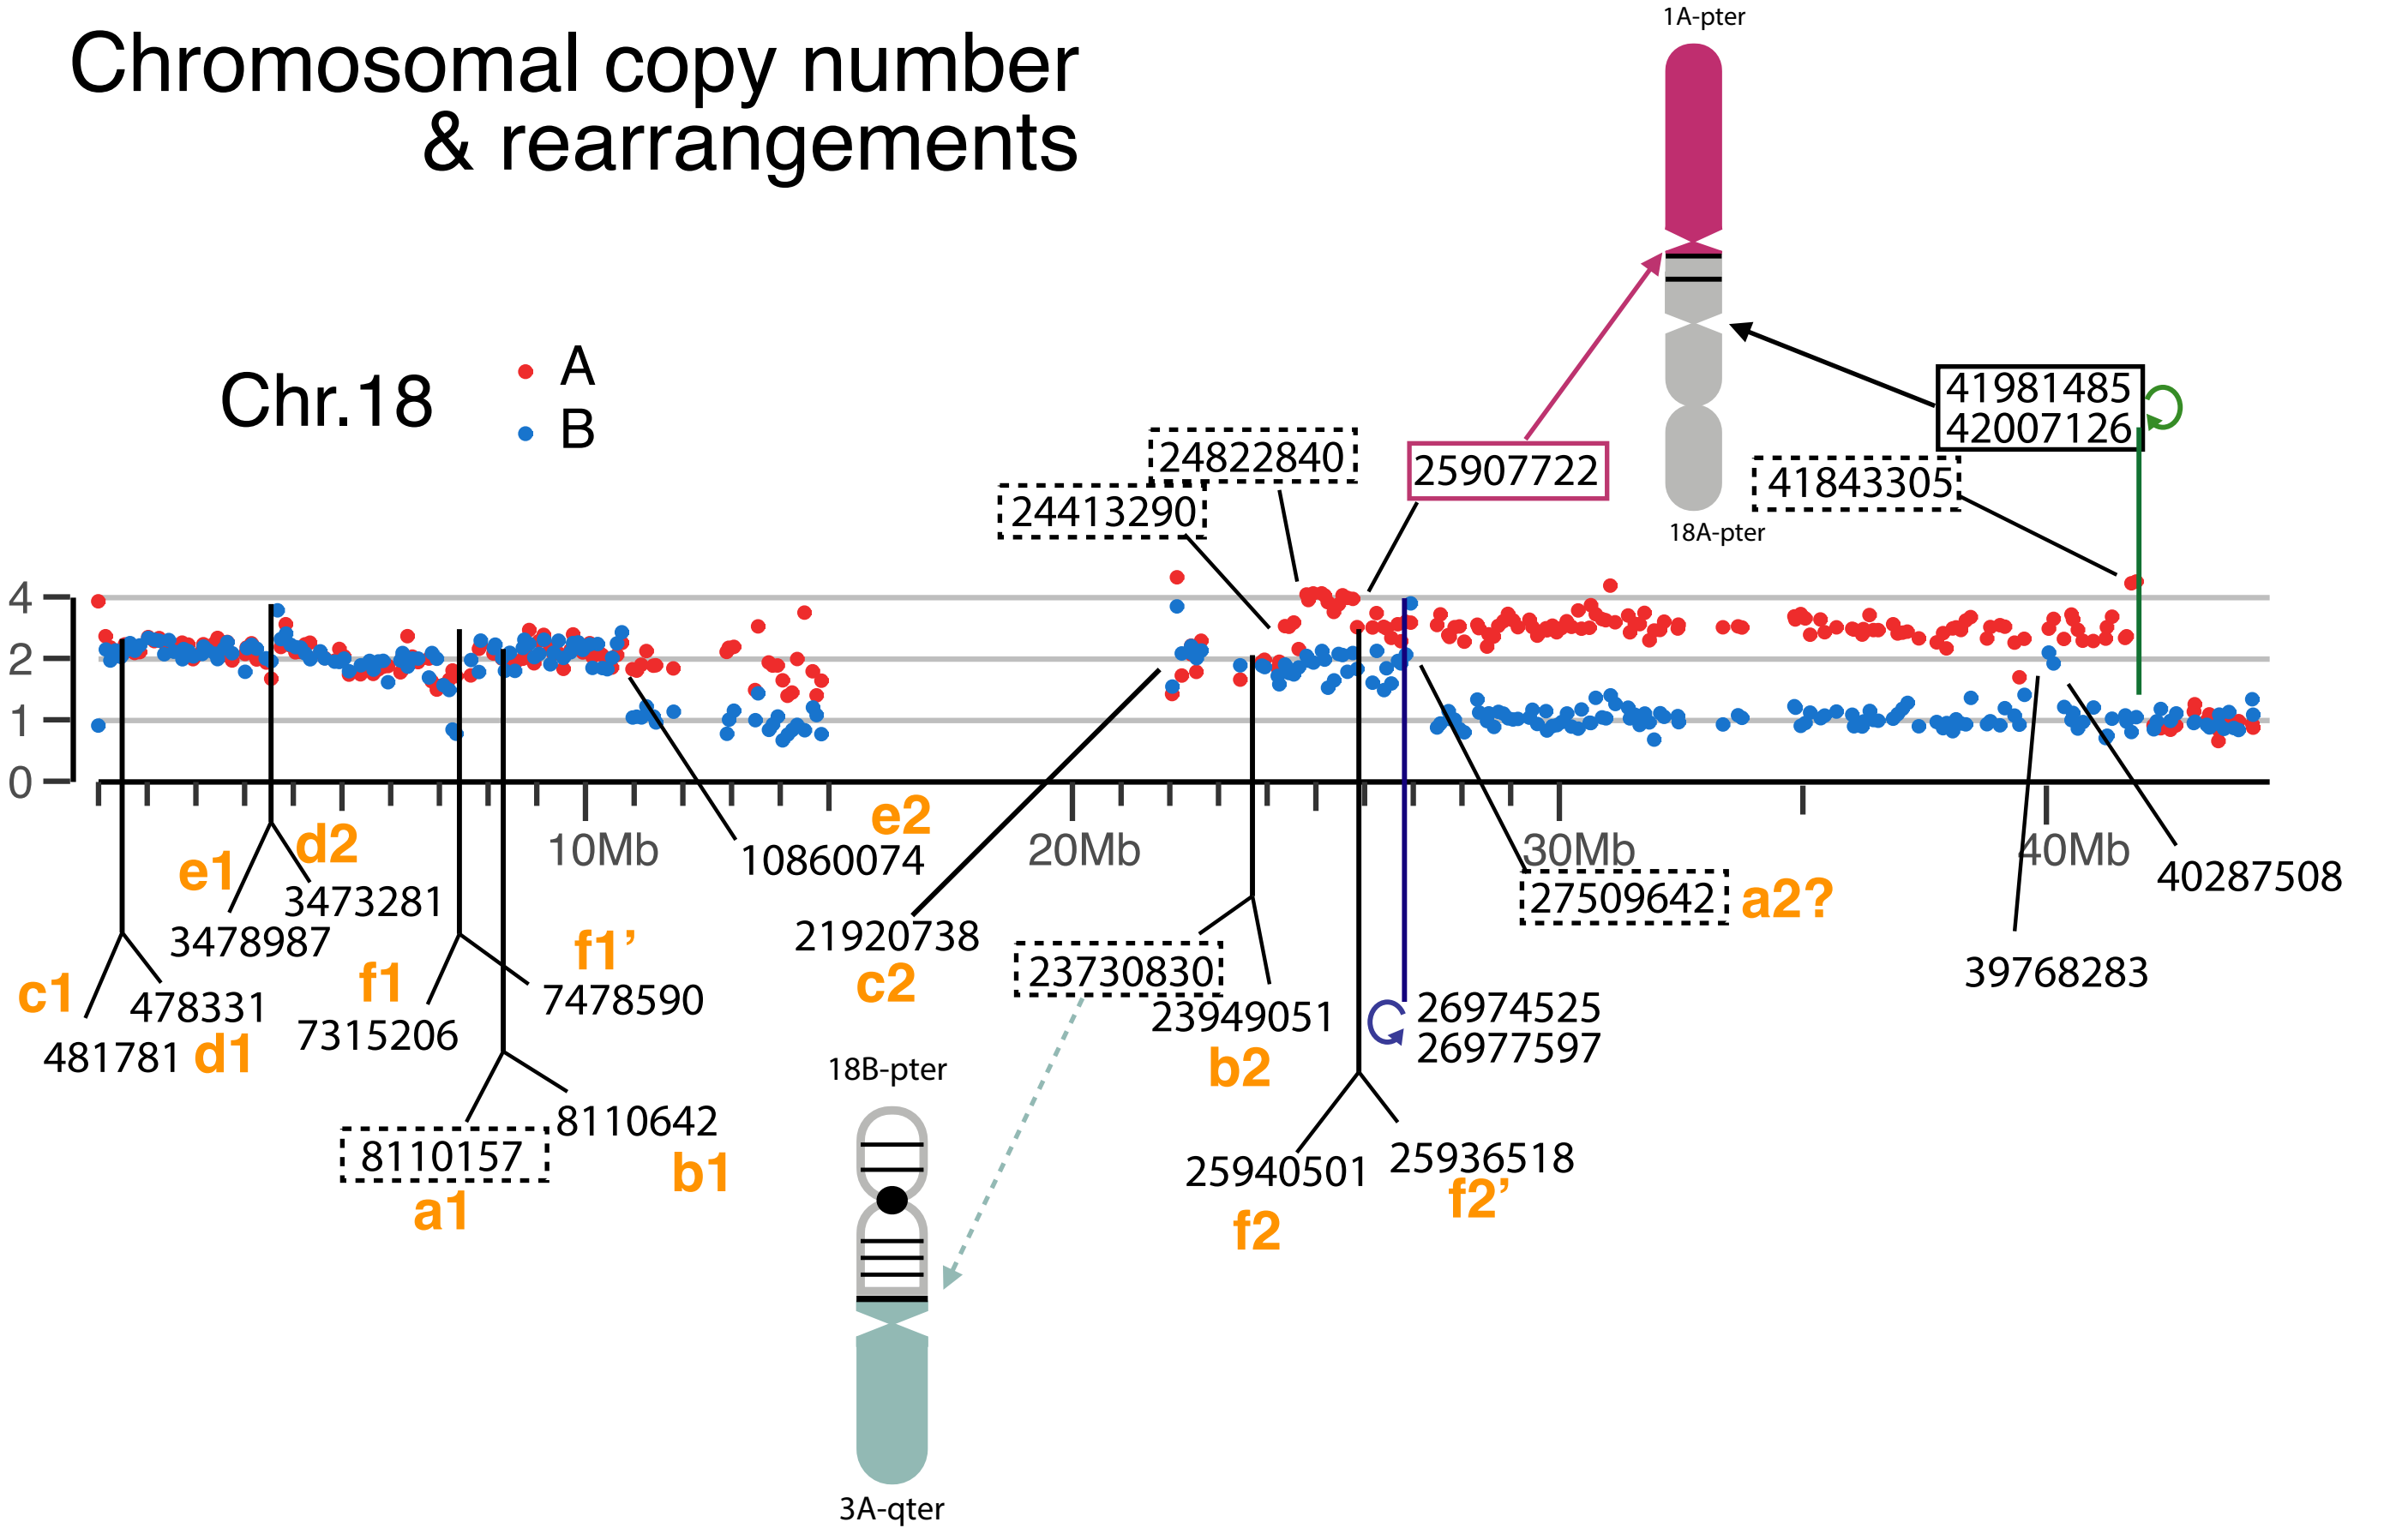

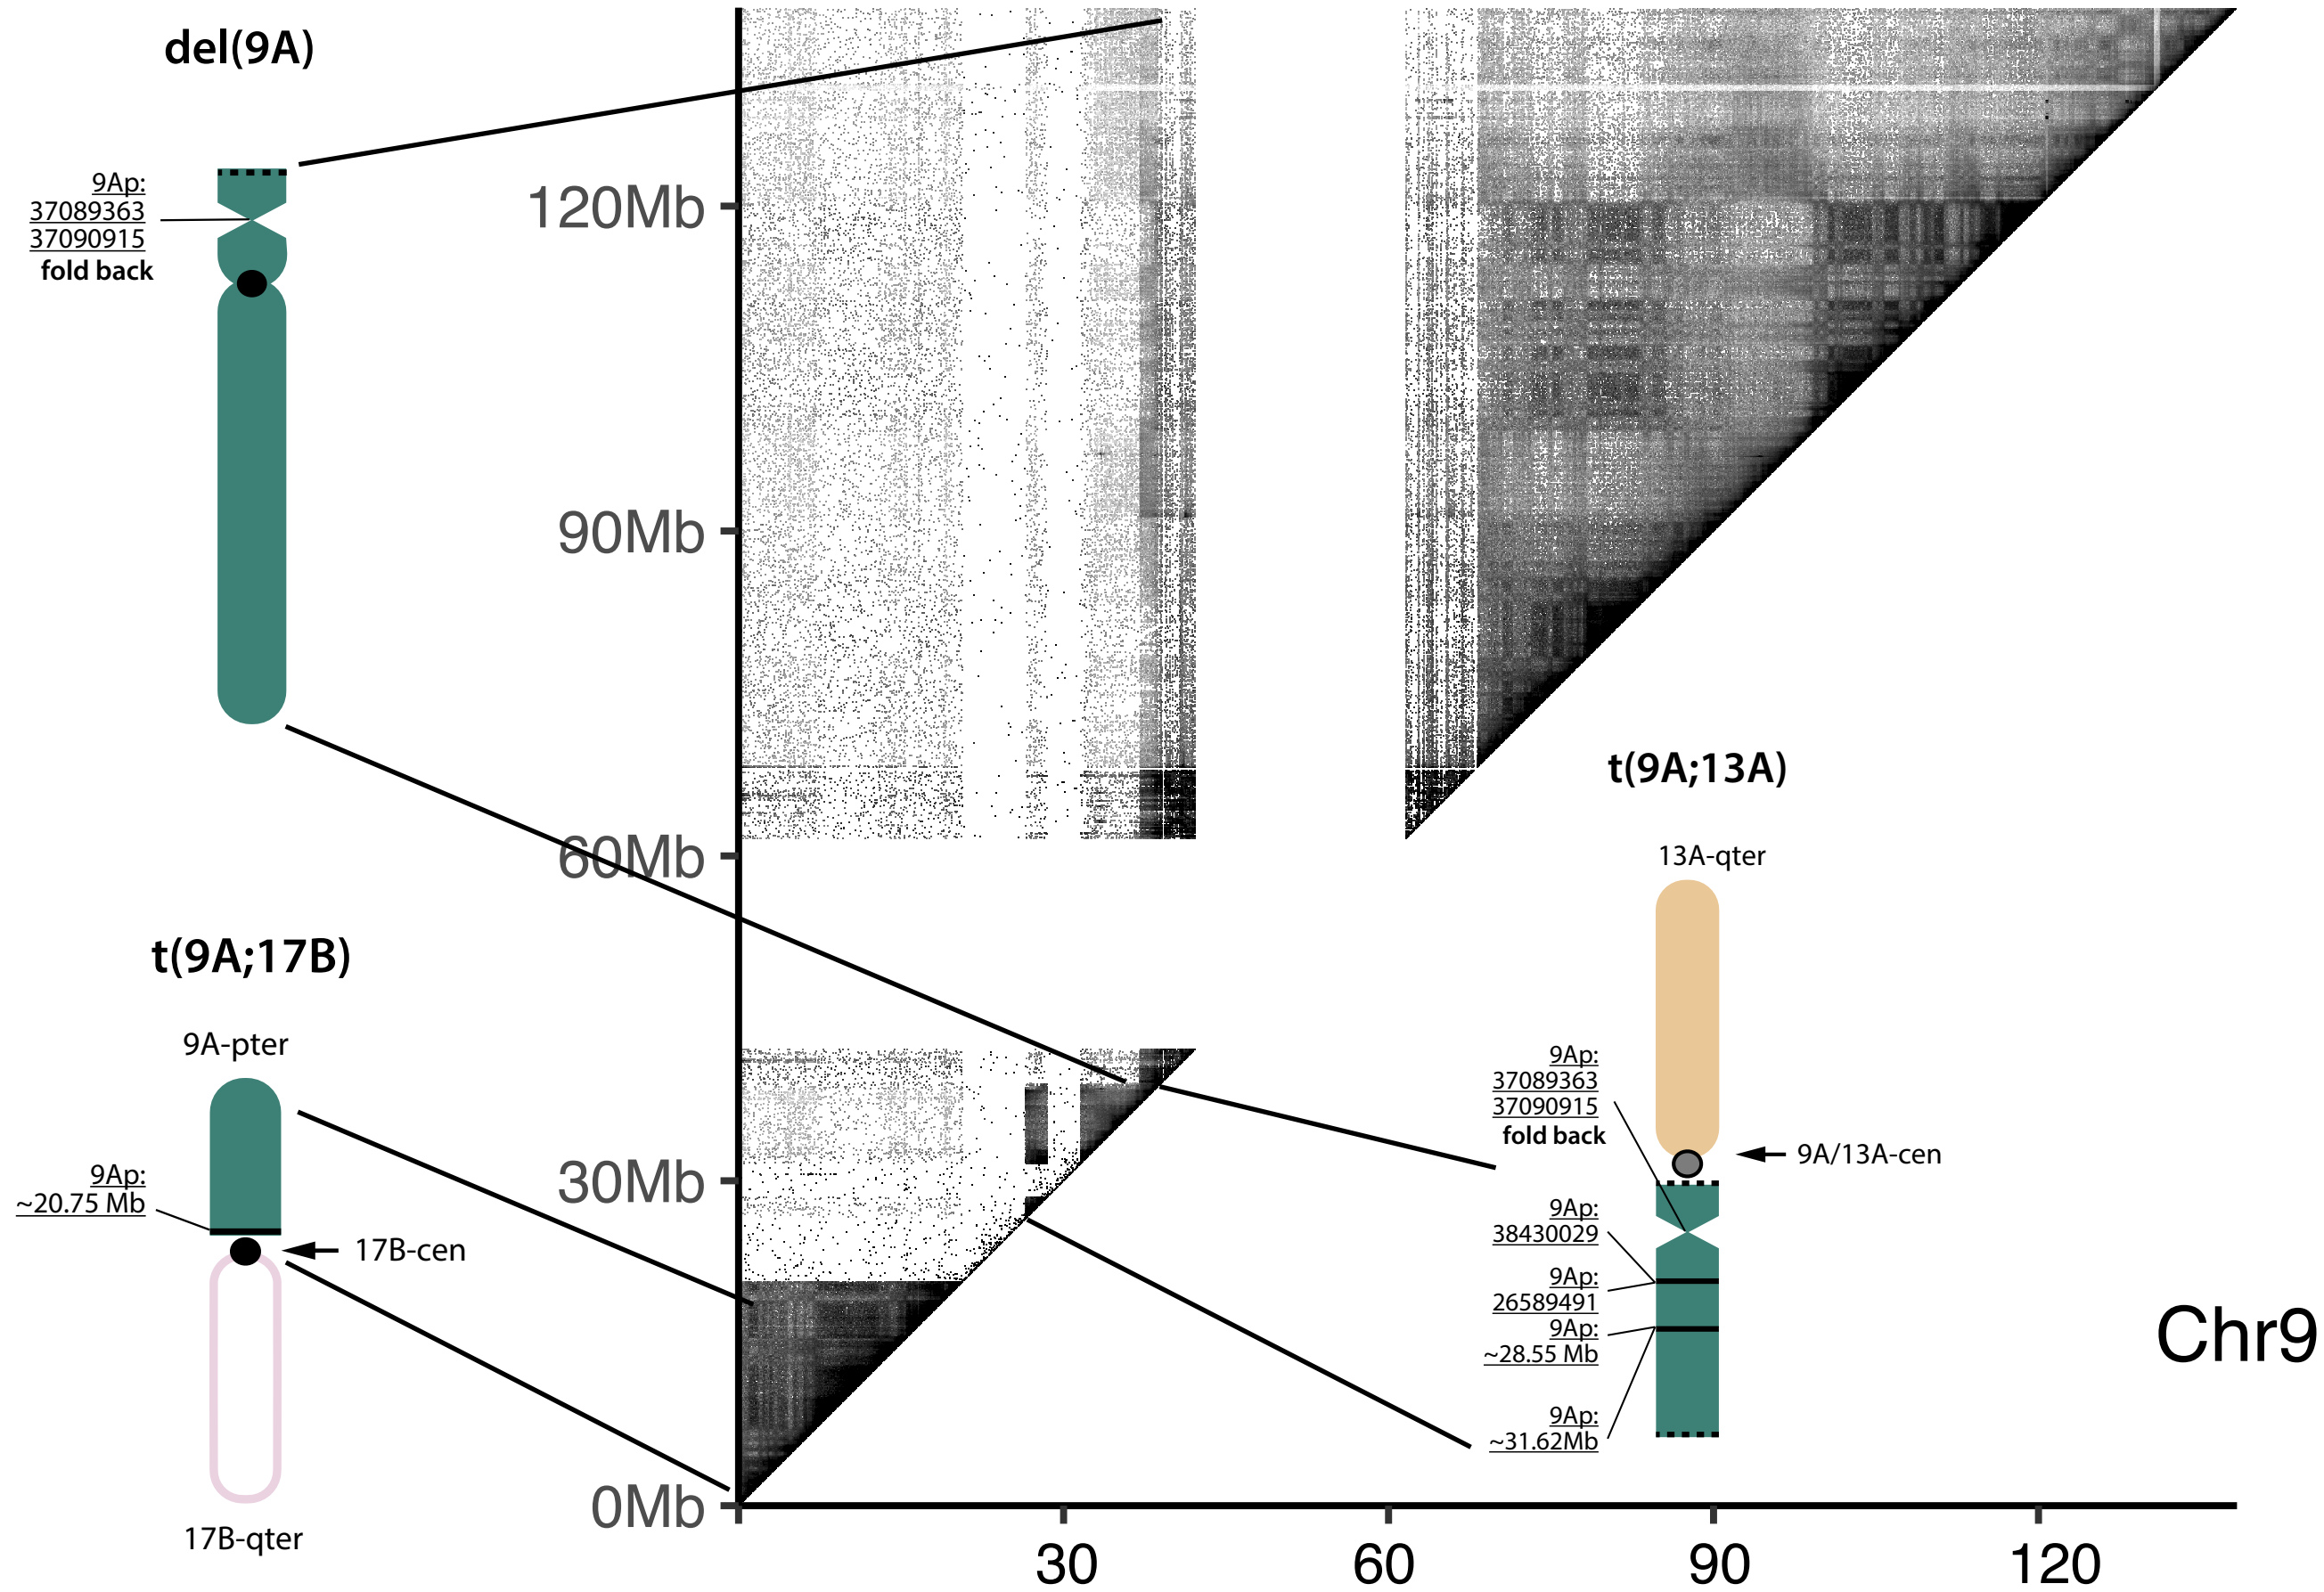

# t(9A;17B)

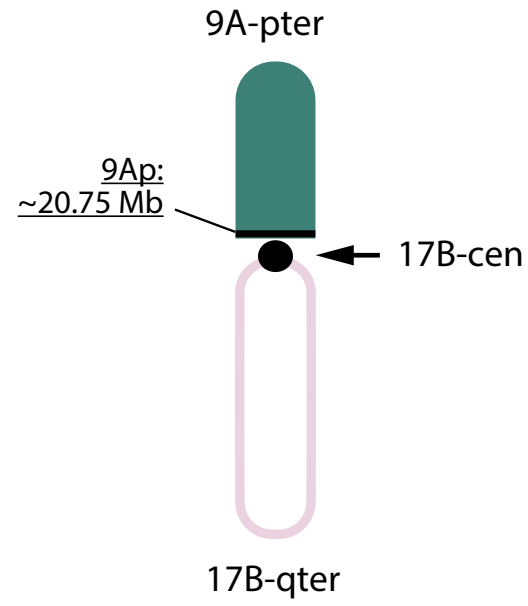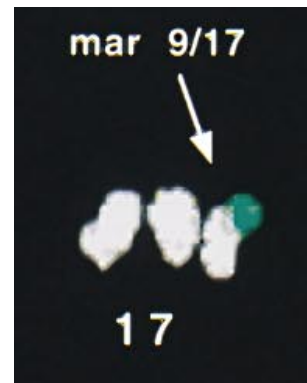

## A

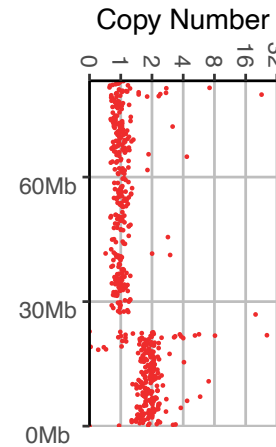

## B

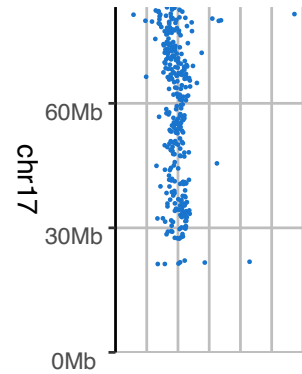

## Chr17

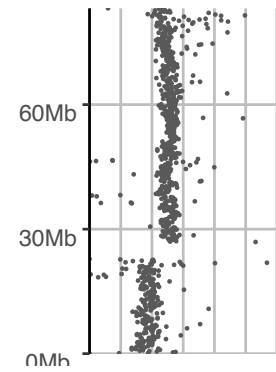

# HiC

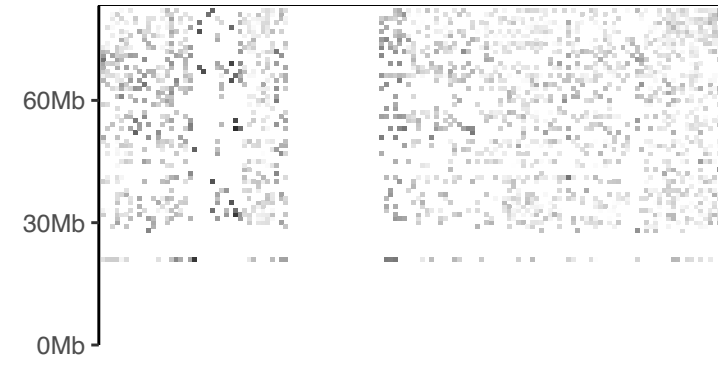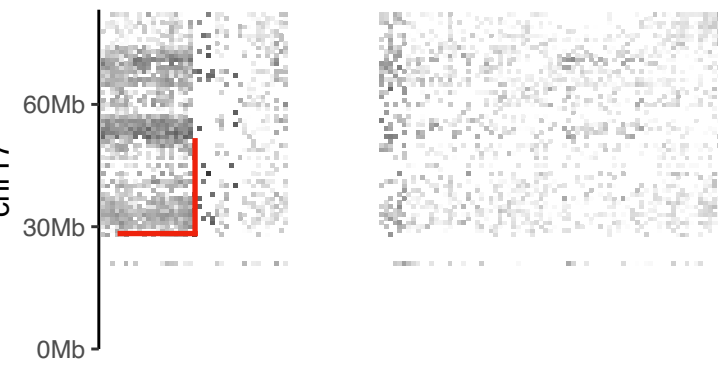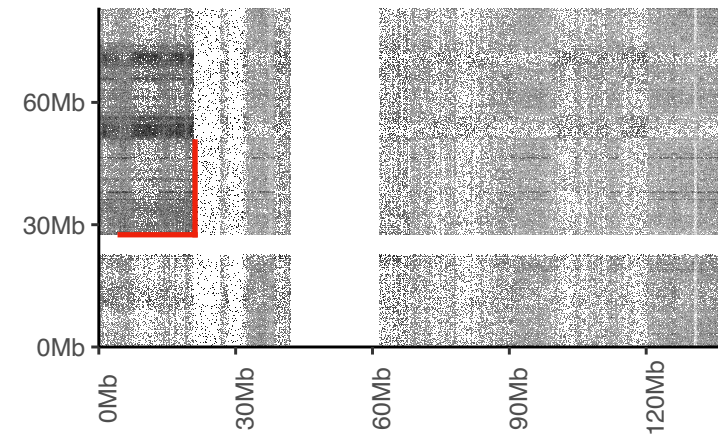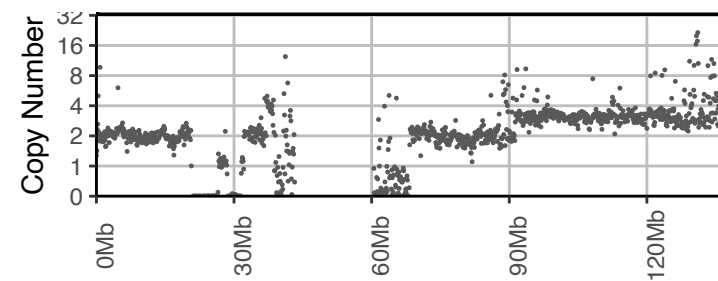

## Chr9A

# HiC

## Chr9A

## Chr13A

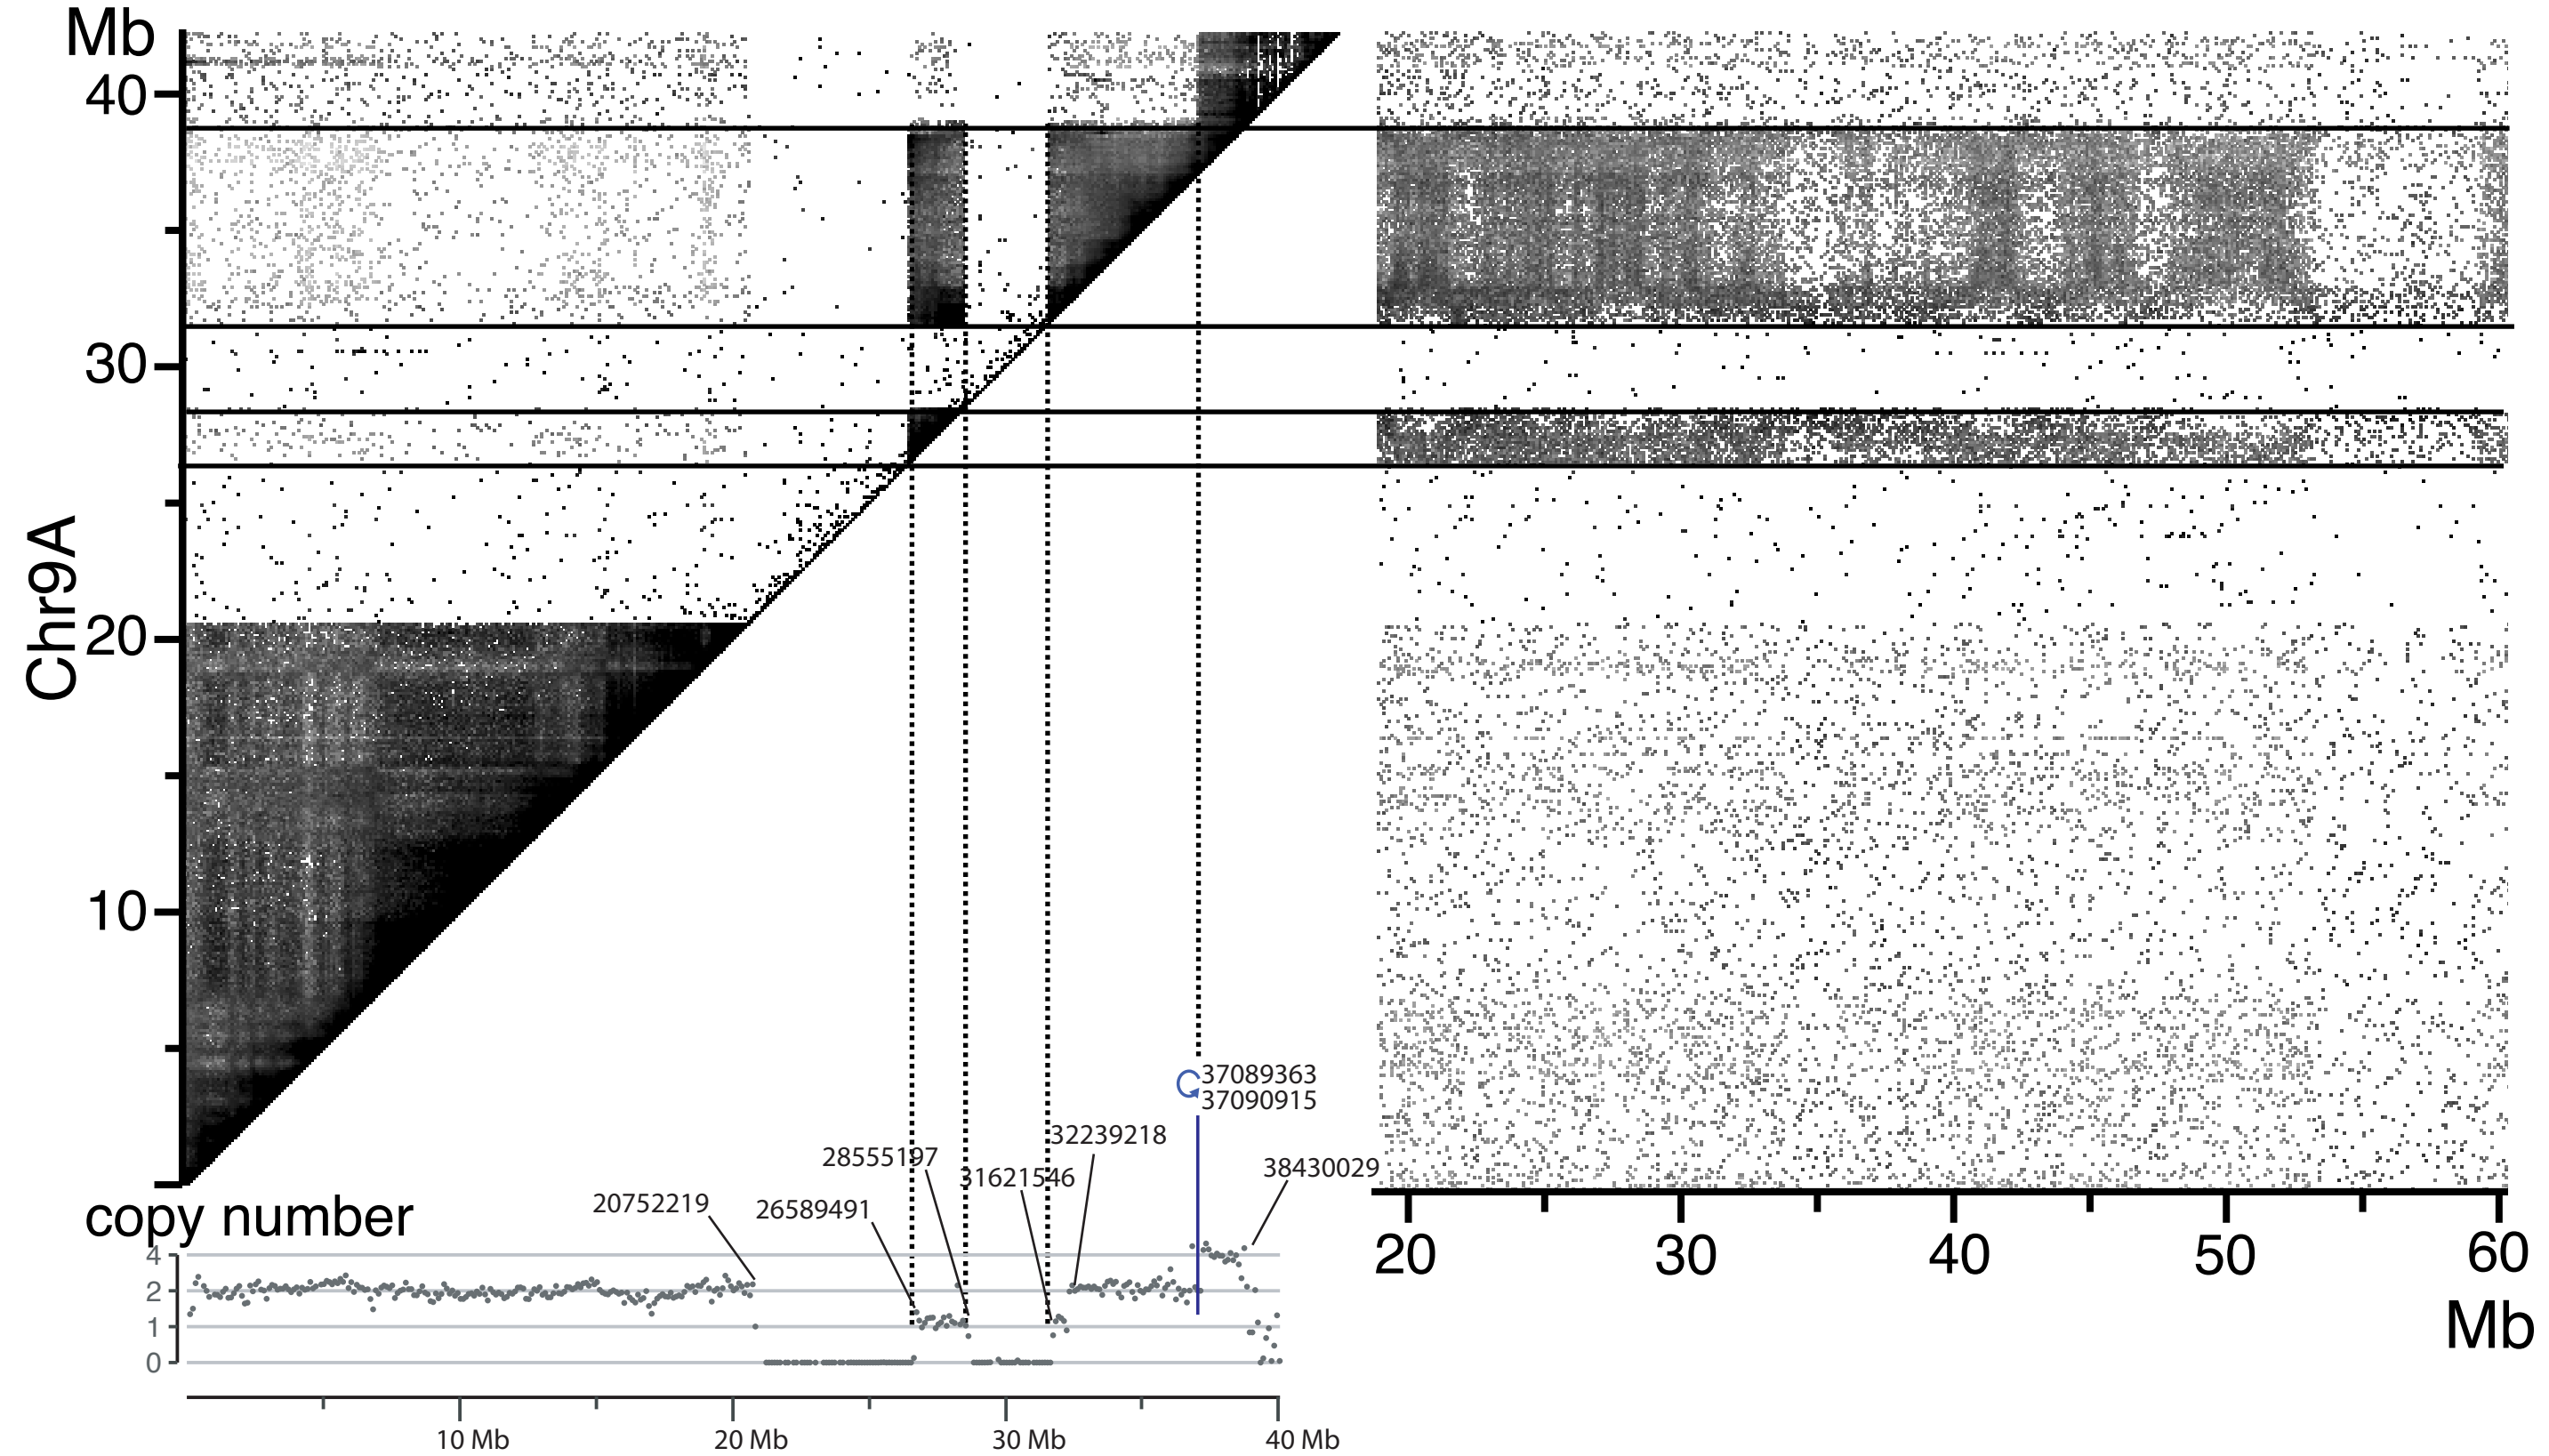

t(9A;17B)

t(9A;13A)

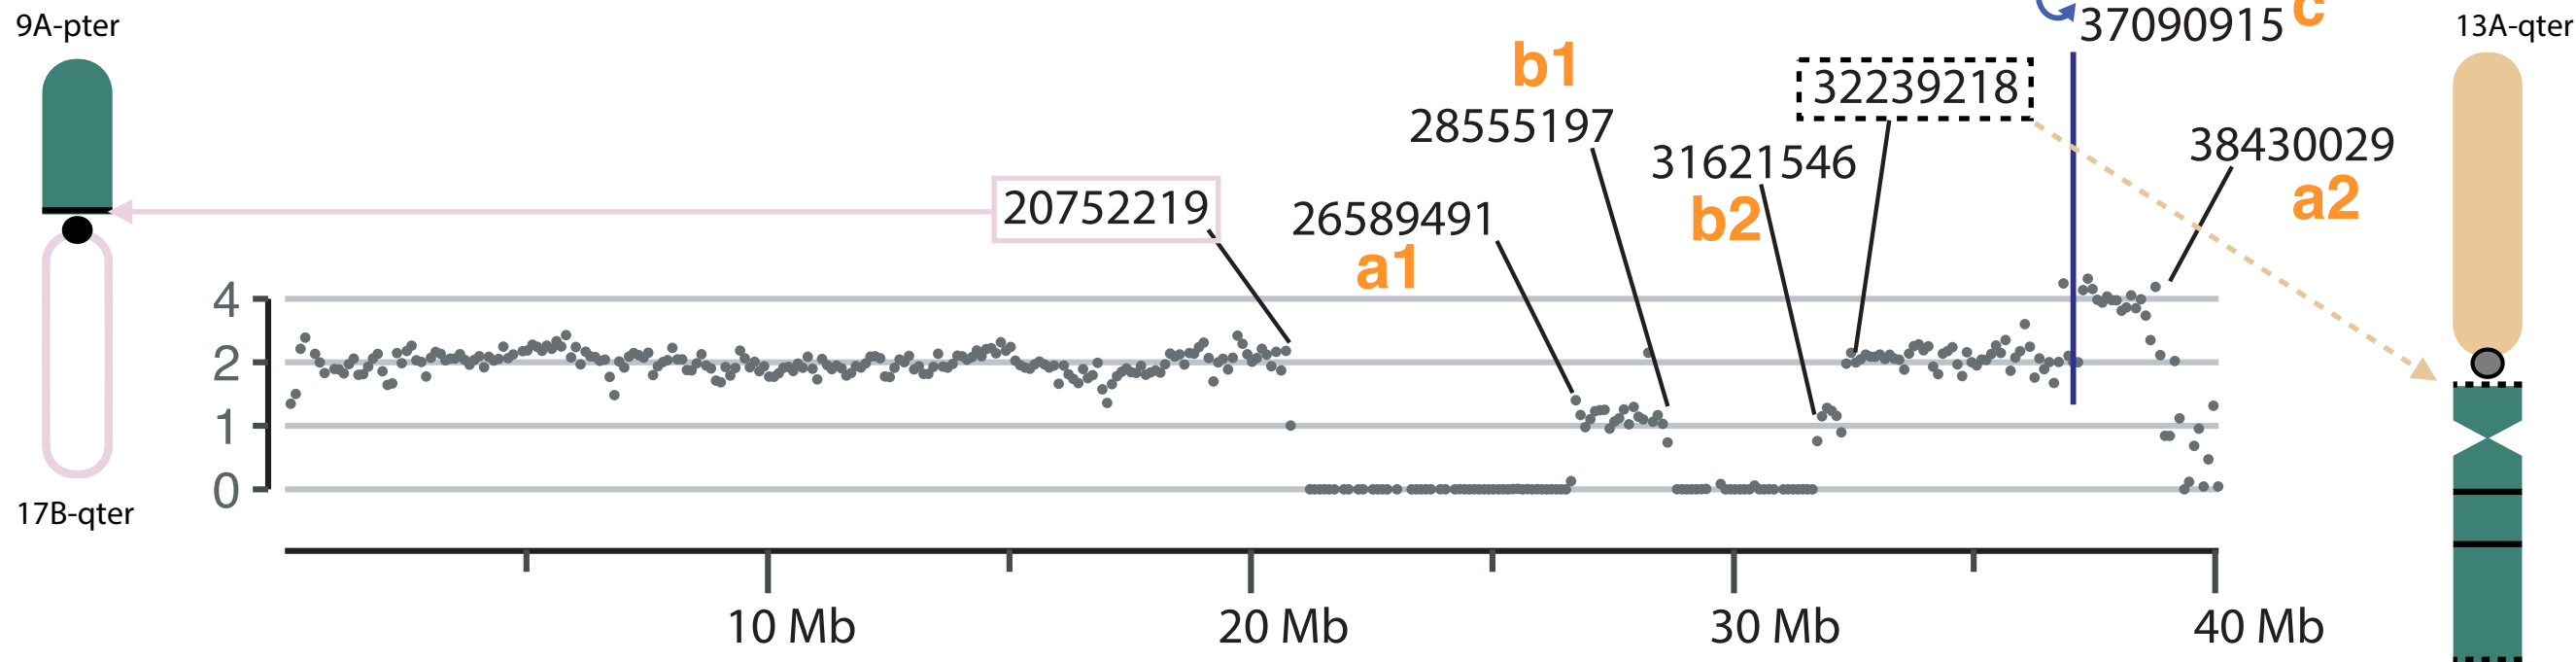

10X

**a** chr9\_26589491---chr9\_38430029

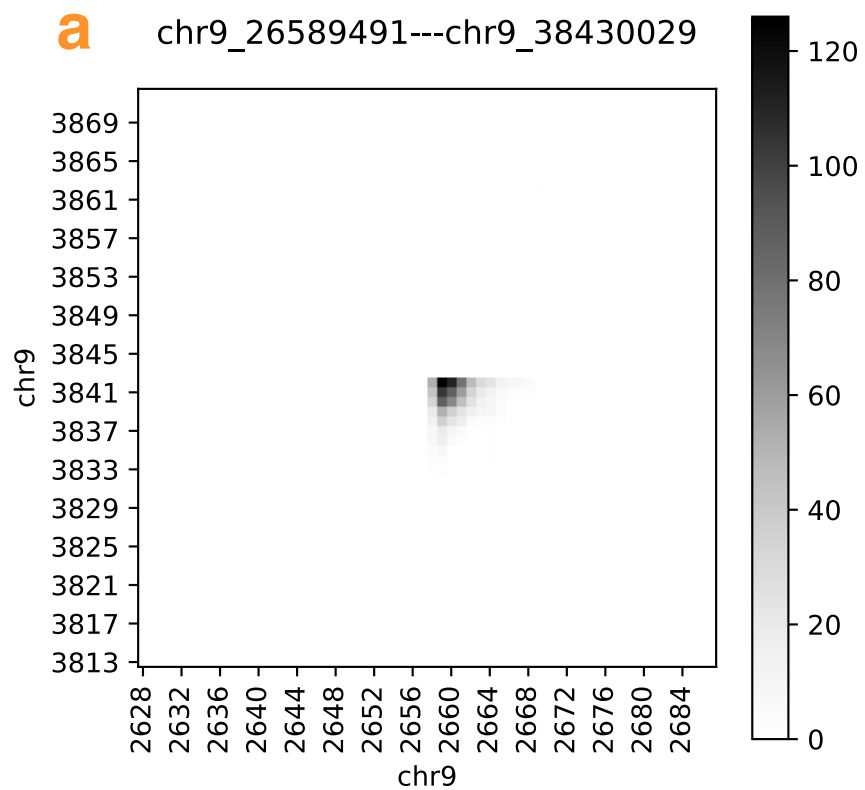

**b** chr9\_28556000---chr9\_31621546

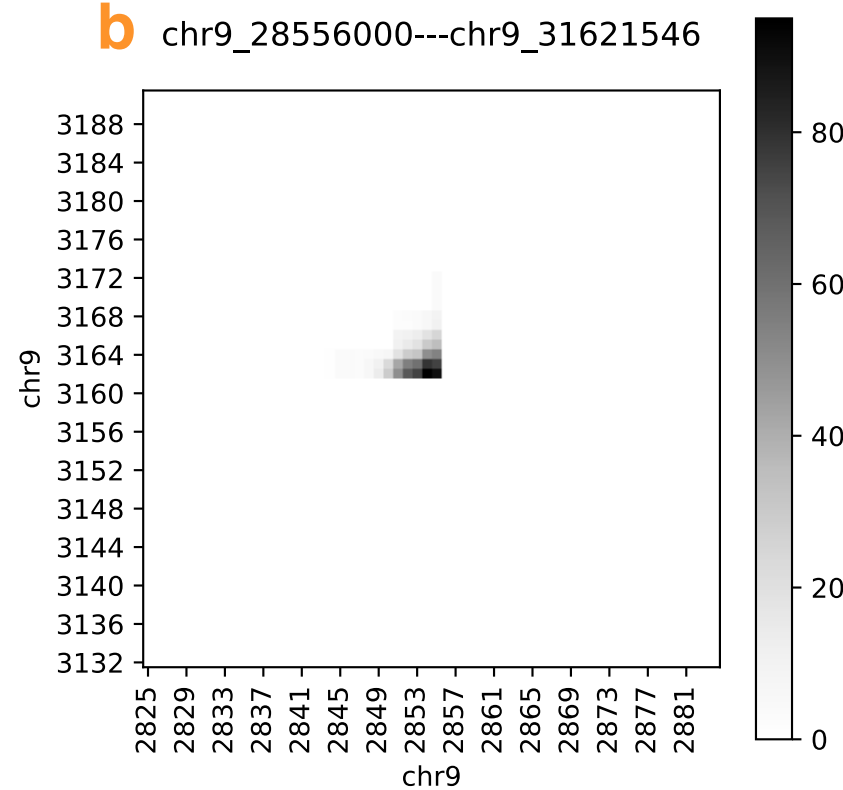

**c** chr9\_37089363---chr9\_37090915

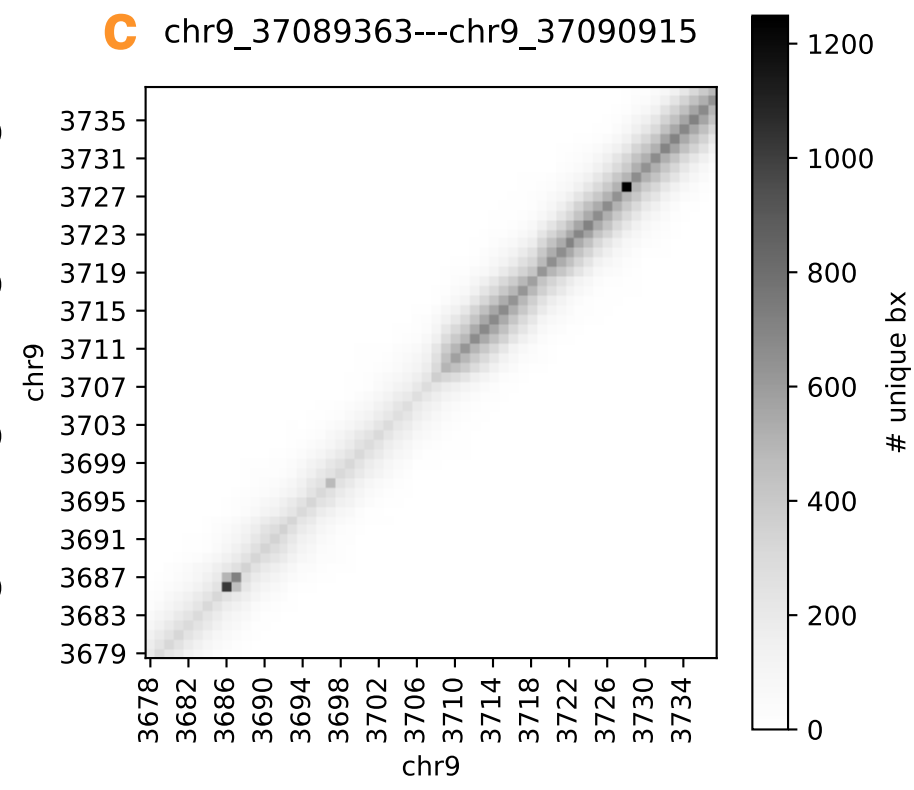

t(9A;13A)

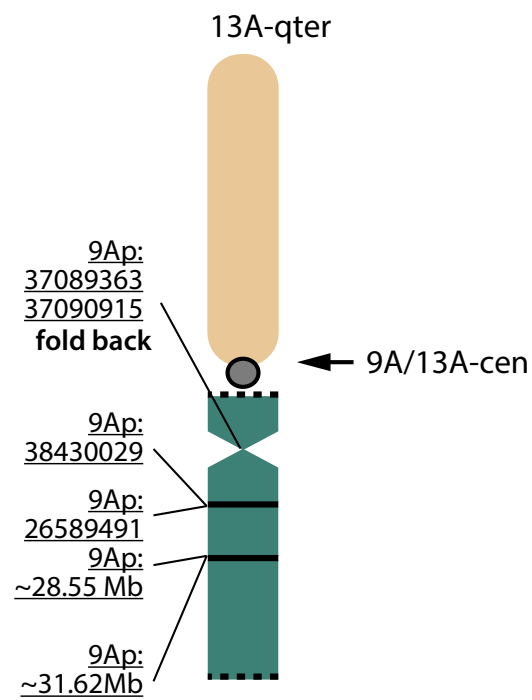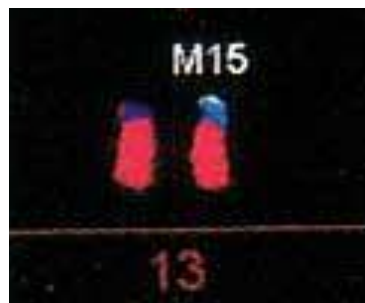

HiC

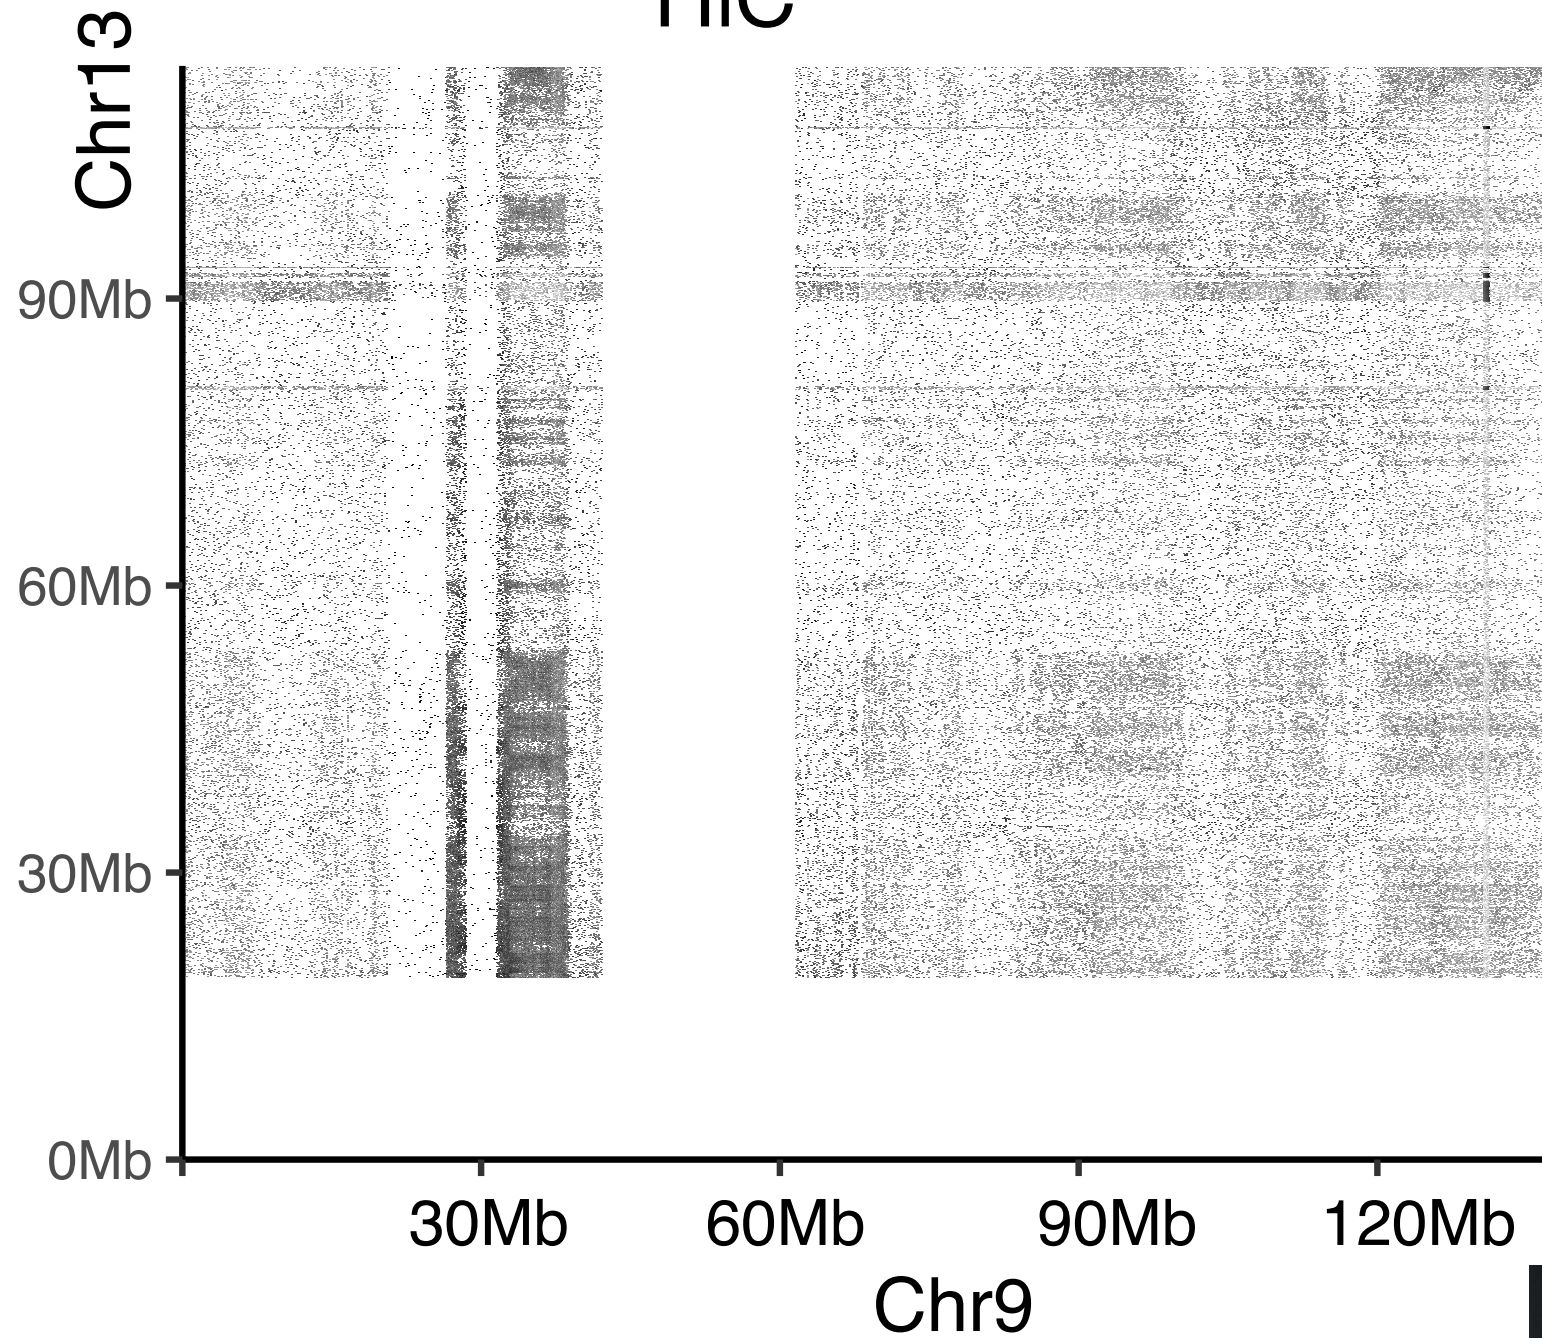

t(22A;9-13-22 hsr)

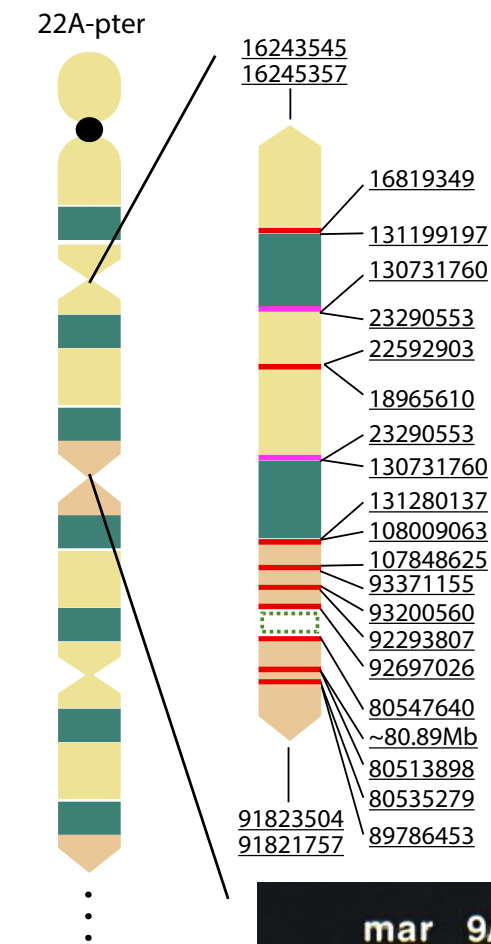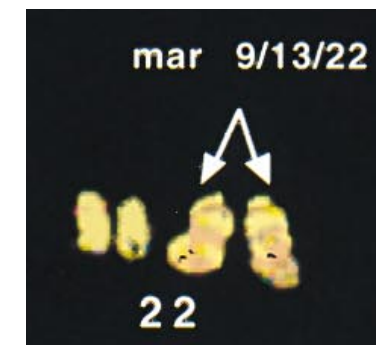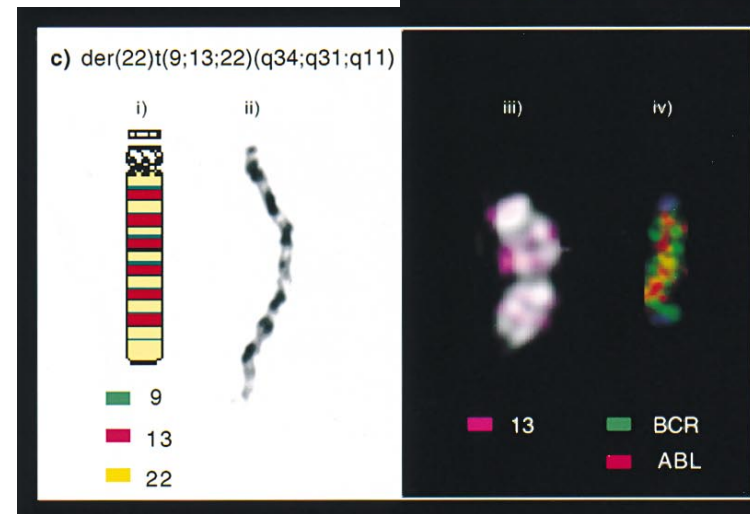

t(22A;9-13-22 hsr)

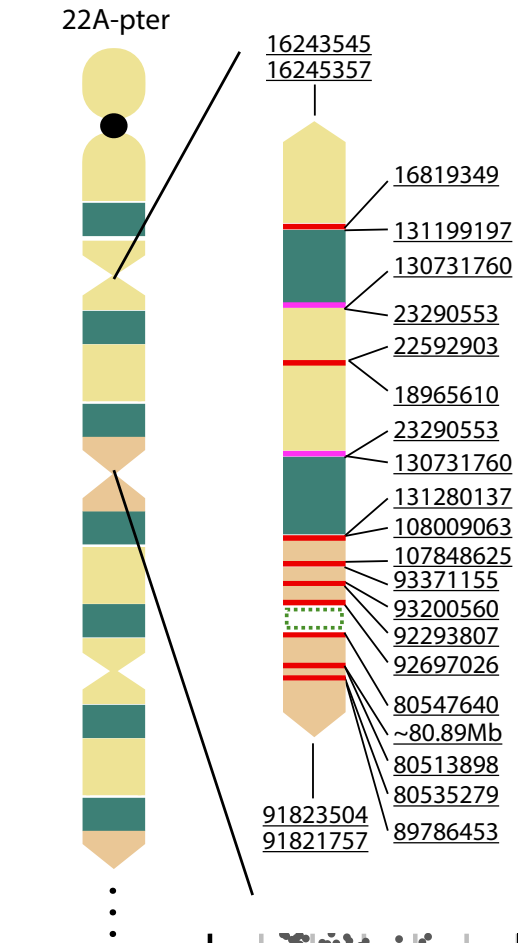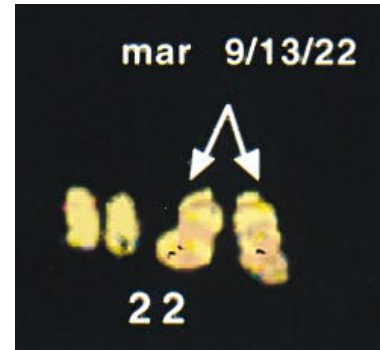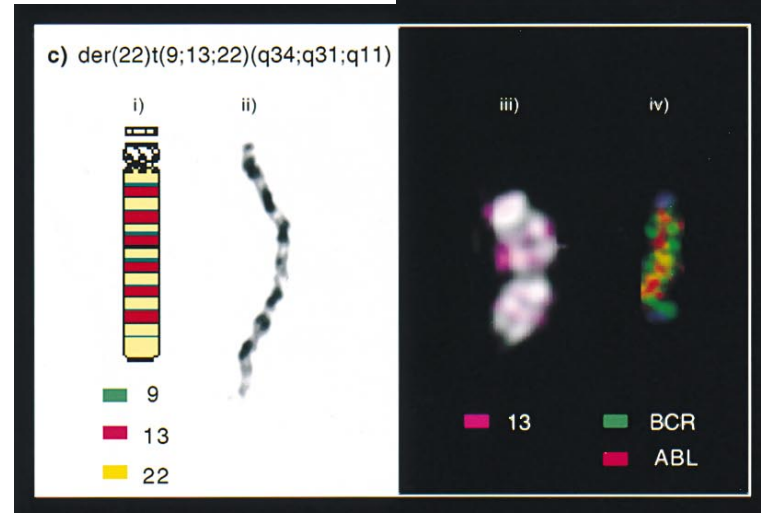

HiC

Chr13

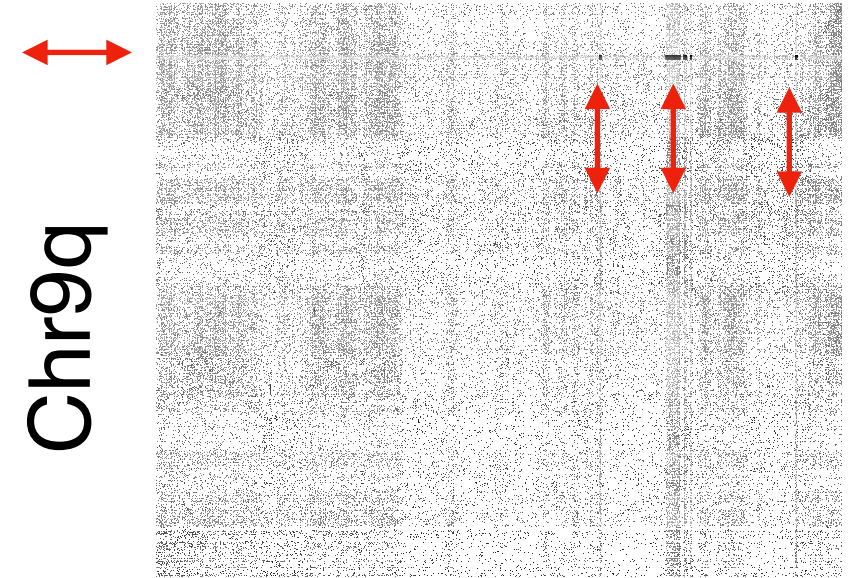

Chr22

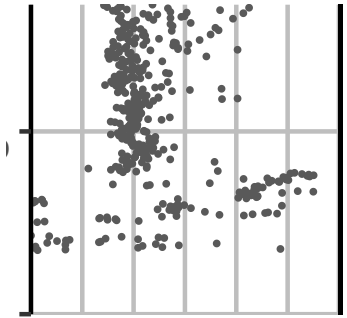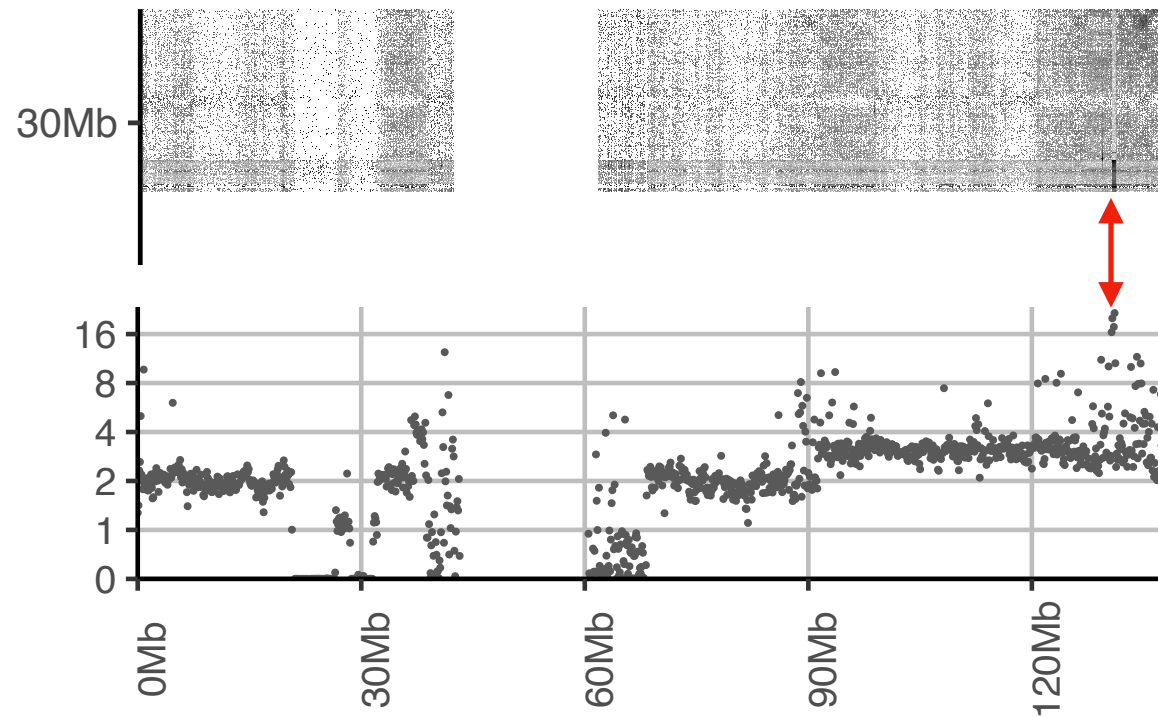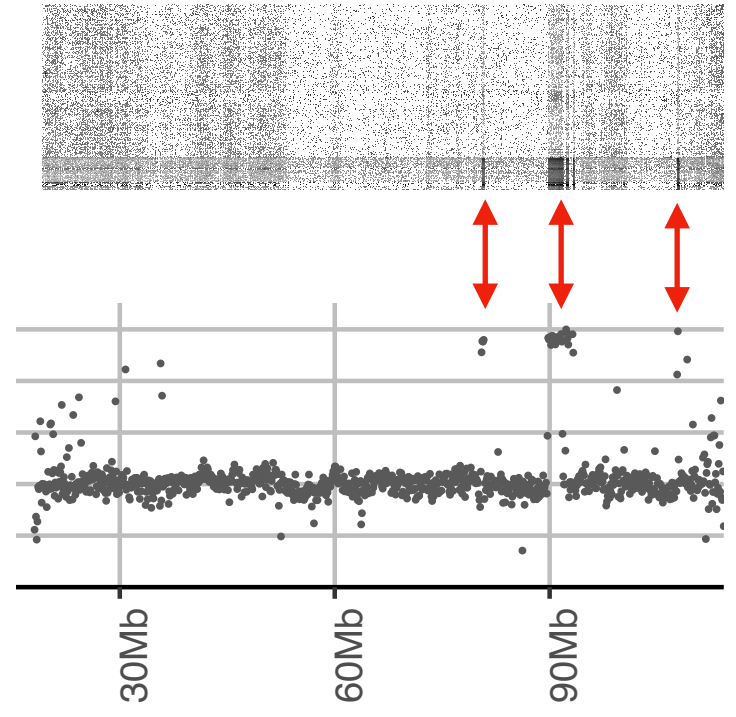



t(22A;9-13-22 hsr)

10X

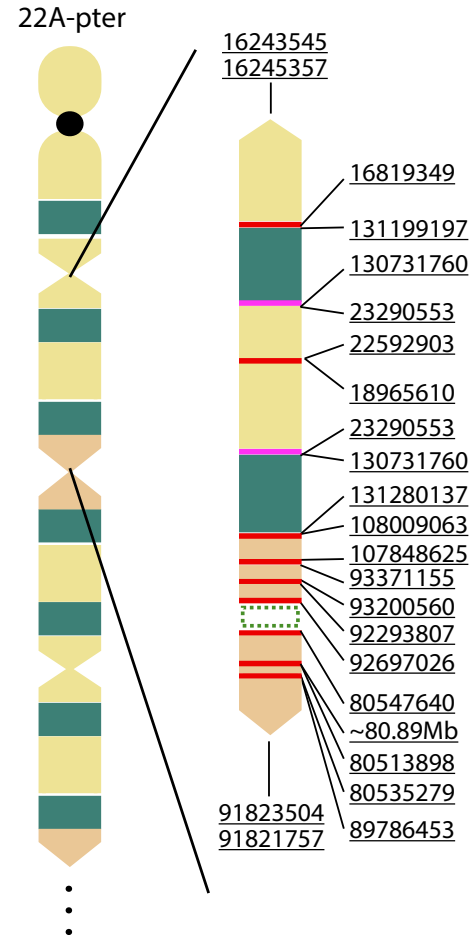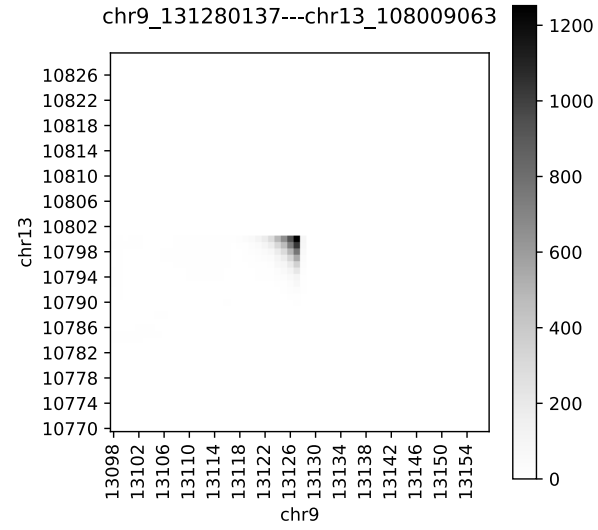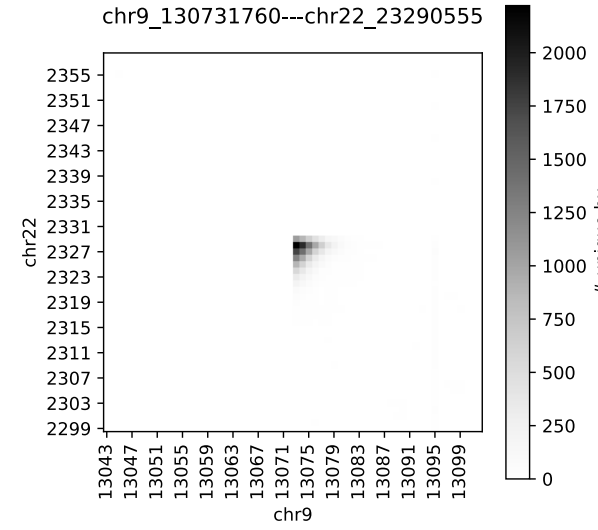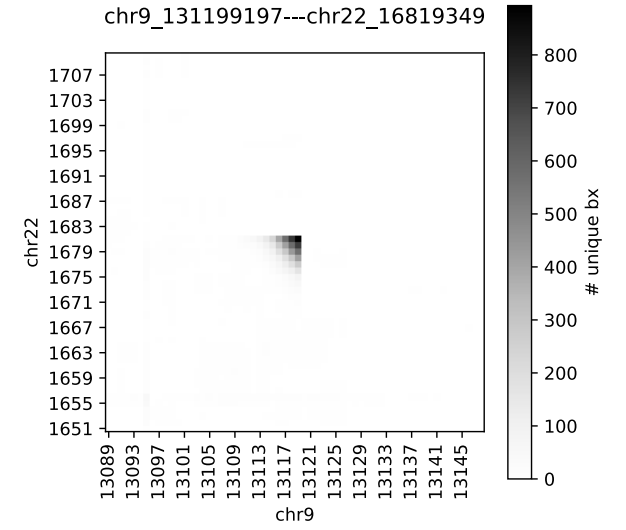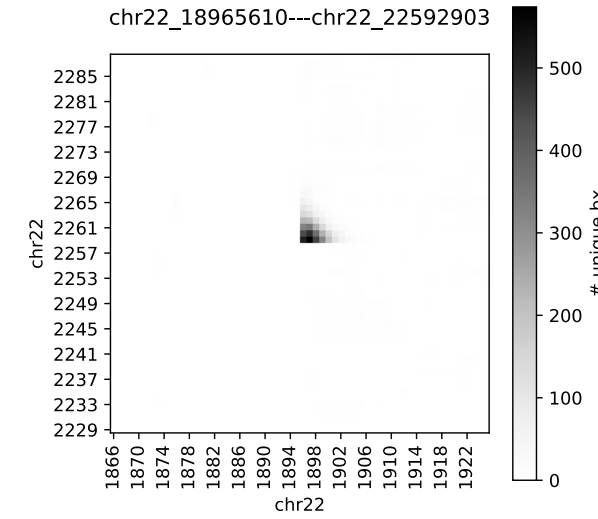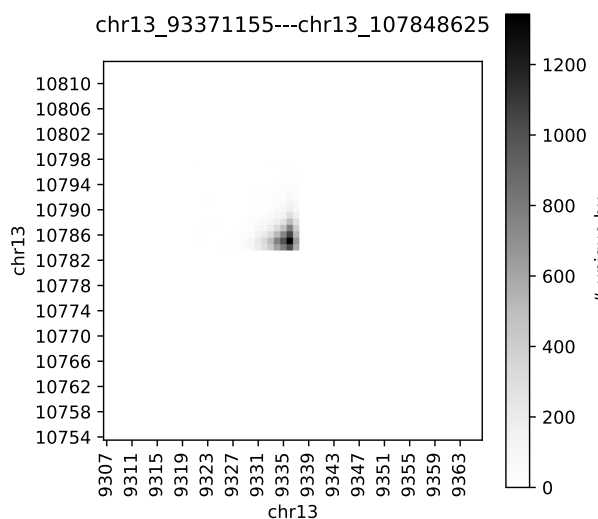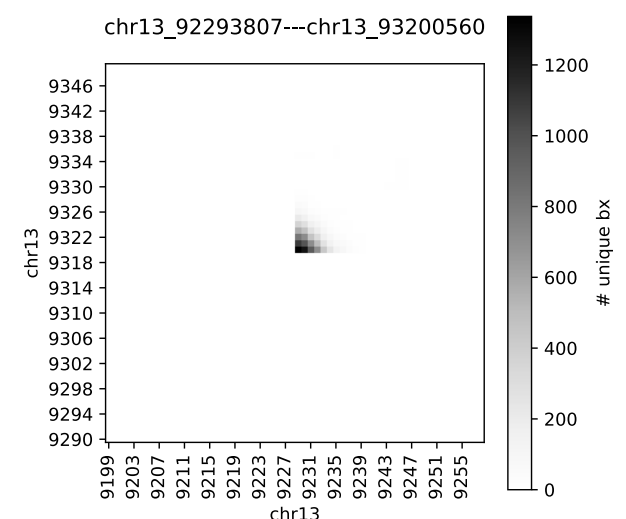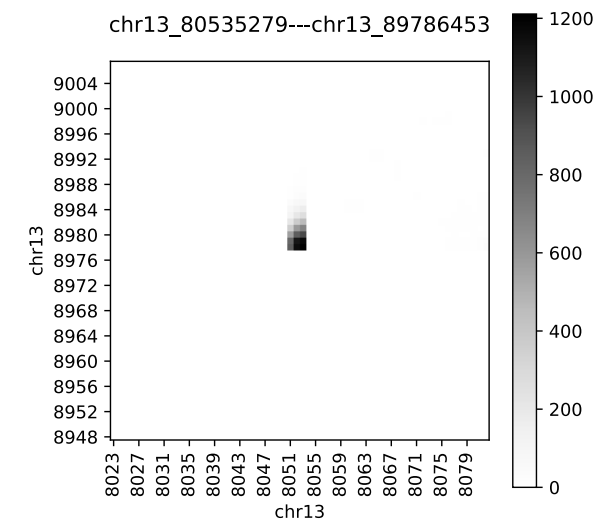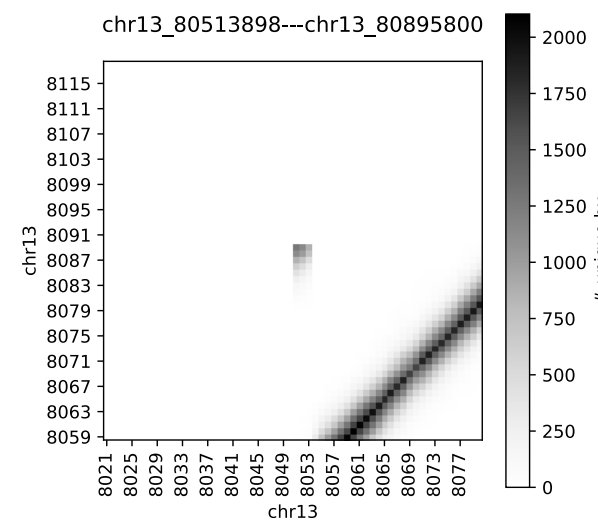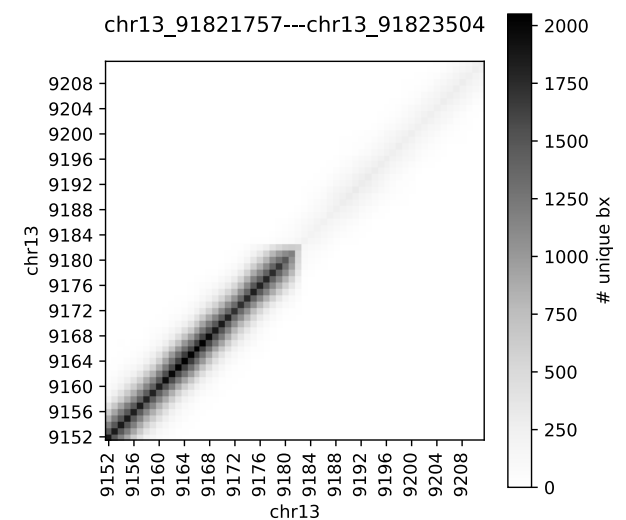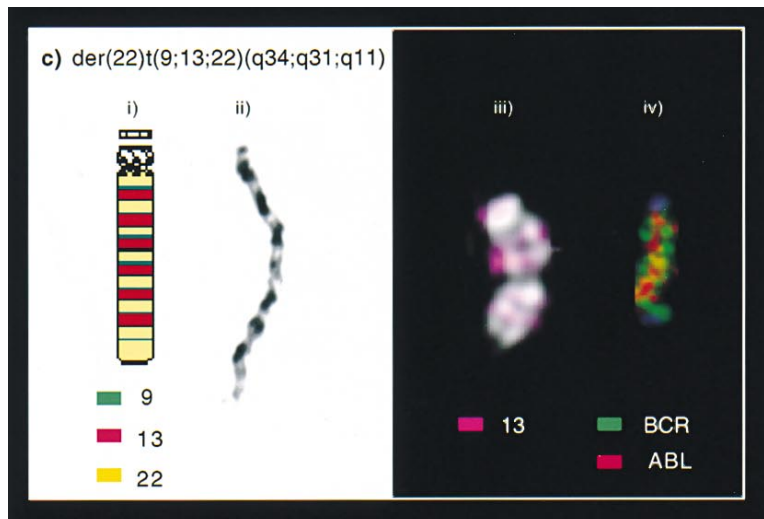

Supplement: 13059_2021_2330_MOESM5_ESM.pdf [file 13059_2021_2330_MOESM5_ESM.pdf]
